# 1 **A comparison of several media types and basic** 2 **techniques used to assess outdoor airborne fungi in** 3 **Melbourne, Australia.**

4 **Wesley D Black** <sup>1\*</sup>

5 <sup>1</sup> Biotopia Environmental Assessment, Melbourne, Victoria, Australia

6 \* [wesblack@biotopia.net.au](mailto:wesblack@biotopia.net.au) (WDB)

7 Received: August 2020; Accepted: **date** TBA 2020; Published: **date** TBA 2020

## 8 **Abstract**

9 Despite the recent increase in interest in indoor air quality regarding mould, there is no single  
10 widely accepted standard media for the detection of airborne fungi, nor verification of many  
11 commonly used techniques. Commonly used media including malt-extract agar (MEA), Sabouraud  
12 dextrose agar (Sab, SDA, SabCG), potato dextrose agar (PDA) with and without antibiotics  
13 chloramphenicol & gentamycin (CG) were compared for their suitability in detecting a range of  
14 common airborne fungi by collecting 150 L outdoor air on a number of different days and seasons  
15 via an Anderson 400-hole sampler in suburban Melbourne, Australia. There was relatively little  
16 variation in mean numbers of colony forming units (CFU) and types of fungi recovered between  
17 MEA, PDA, SabCG media groups relative to variation within each group. There was a significant  
18 difference between SabCG, Dichloran-18% glycerol (DG18) and V8® Original juice agar media,  
19 however. Antibiotics reliably prevented the growth of bacteria that typically interfered with the  
20 growth and appearance of fungal colonies. There was no significant evidence for a growth  
21 enhancing factor from potato, mineral supplements or various vegetable juices. Differing glucose  
22 concentrations had modest effects, showing a vague ideal at 2%-4% with peptone.  
23 Sanitisation/sterilisation of the aluminium Andersen 400-hole sampler top-plate by flame is  
24 possible, but not strictly required nor advisable. The use of SabCG as a standard medium was  
25 generally supported.

## 26 Introduction

27 Mould are the wide range of fungal organisms that flourish under damp conditions indoors and  
28 outdoors, and in humans exposure is linked to the exacerbation of asthma, allergic rhinitis and  
29 occasionally infection. Intoxication from the ingestion of mould/mycotoxin-contaminated foods is  
30 known [1], but the causal relationship between mould inhalation and noted significant respiratory  
31 conditions including acute infant idiopathic pulmonary haemorrhage requires additional  
32 investigation [2].

33 A review of the current literature suggests there is no universally or even widely-accepted  
34 method for detecting, identifying and/or enumerating them within buildings, and similarly a lack of  
35 widely-accepted limits for maximum permissible and/or normal exposure to occupants, or even what  
36 may constitute a 'mouldy' house.

37 Outdoors, various moulds, yeasts, various other fungi and organisms saprophytically degrade  
38 organic matter such as fallen leaves, trees, etc., and are generally ecologically beneficial [2]. The most  
39 common outdoor mould & yeast genera/types noted in studies in the Northern Hemisphere were  
40 *Cladosporium*, *Aspergillus*, *Penicillium*, *Alternaria*, *Candida*, *Botrytis* and *Helminthosporium* [2]. Within  
41 houses not known to be problematic the most common mould & yeast genera/types noted were very  
42 similar to outdoors, but included *Epicoccum* mould and *Streptomyces* bacteria [2]. These indoor  
43 organisms are not usually a problem except in persistently humid or wet areas of houses in which  
44 such organisms significantly grow in number [2]. Exposures to mould varies depending on a range  
45 of factors including regional differences, local climate including outdoor humidity and wind, shade,  
46 organic debris, landscape maintenance, etc., heating and cooling systems, indoor humidity and air-  
47 filtration and ventilation systems [2]. Dampness in a house is also associated with the deterioration  
48 of structural components such as plasterboard / Gyprock / drywall panels [3].

49 Mould has the potential to cause a variety of adverse health effects by both immune- and non-  
50 immune-related mechanisms including immunoglobulin E mediated responses and allergic rhinitis,

51 conjunctivitis and asthma, allergic bronchopulmonary aspergillosis, allergic fungal sinusitis and  
52 hypersensitivity pneumonitis, and actual infection, respectively [2]. Other fungi including yeasts  
53 often found in houses and foodstuffs have been noted as emerging pathogens [4], including  
54 *Rhodotorula*, often seen as the pink stain on tile grout in bathroom showers.

55 There are established health risks associated with living in damp indoor environments per se,  
56 including respiratory symptoms such as wheezing, coughing and allergic rhinitis / ‘hay fever,’ and  
57 asthma symptoms in sensitised persons [2]. It is likely the dampness leads to excess fungal growth  
58 indoors and consequent exposure of occupants, but the precise mechanism remains unclear as yet.

59 While fungi are ubiquitous outdoors and impractical to prevent from being blown into a normal  
60 house, it appears the challenge is to prevent them from actively colonising and growing within the  
61 house, and the key to this is to control indoor moisture by various means [2]. Once a building is wet  
62 enough for such colonisation, remediation is required promptly to prevent further growth by way of  
63 thorough drying ideally within 24-72 hours. Failing this, thorough physical removal of the then  
64 numerous fungal particles including spores and non-spore fragments is also required to reduce  
65 exposure to occupants and site workers [5,6]. There are significant differences of opinion globally on  
66 how best to achieve this, and to what degree, and how to objectively determine if it has actually been  
67 achieved [2,7–13]. This is curious given the increasing number of legal disputes at least in the state of  
68 Victoria, Australia [14] and the Australian Federal Government interest [15].

69 The main established means of determining if a building has been water-damaged and mouldy  
70 is to compare air samples taken from outdoors and in a number of locations indoors, counting fungal  
71 particles by either culture-based methods for ‘viable’ colony-forming units (CFU), or microscopy-  
72 based ‘total-count’ of identifiable fungal particles, or ideally both in order to overcome the limitations  
73 of each, as also airborne and settled particles, and measurement of excess dampness and humidity  
74 [7,16].

75 A long-used method of collecting and enumerating airborne viable particles is the Anderson air  
76 sampler [17]. The unit consists essentially of a calibrated air-pump drawing air through an airtight

77 disk-like top-plate assembly with a set of 200 or 400 small holes directly over a 90 mm diameter Petri  
78 dish of suitable agar gel media held within the assembly. Air drawn through the holes hits the gel  
79 surface, deflecting sharply and hence depositing airborne particles on the damp gel. The Petri dish is  
80 then removed from the assembly and incubated for a period to allow growth of organisms able to do  
81 so on that media at the incubation temperature, and facilitating identification and enumeration.

82 The collection and enumeration of surface-borne or settled viable particles is often by simple  
83 sterile swab collection of a known surface area, then transferred to a similar Petri dish of media and  
84 incubated. Other methods exist such as replicate organism detection and counting (RODAC) touch-  
85 plates that employ a slightly convex agar gel surface with flattened top that is applied to the test  
86 surface then incubated [18,19]. These, however, have been found to have a poor and variable recovery  
87 rate from standardised indicator-organism seeded surfaces between several commercial products  
88 [20]. It also remains to be seen which agar media is best suited to the purpose of viable-counts in  
89 general regardless of the method of sample collection.

90 The use of settle-plates or open Petri dishes exposed to air for a time to enumerate viable  
91 airborne/settling particles has been used in the past [21] or more recently by researchers without  
92 ready access to powered air-sampling devices [22–25].

93 Methods of estimating the degree of microbial contamination of surfaces by the detection of  
94 adenosine triphosphate (ATP), the ‘universal energy currency’ of a living organism is established for  
95 industries such as food preparation surfaces and machinery, surgical operating theatres and sterile  
96 containment facilities for the manufacture of pharmaceuticals [26]. Such methods, however, were  
97 developed more for the detection of actively respiring easily lyseable organisms such as vegetative  
98 bacterial cells and yeasts on surfaces potentially contaminated with foodstuffs more as a means of  
99 determining the efficacy of cleaning and sanitisation protocols. Such systems have been criticised,  
100 however for not considering the significant variation in ATP content between the range of organisms  
101 on any given surface, and their states of nutrition, growth cycle, sporulation/germination, and the  
102 significant relative amount of ATP from fresh foodstuff residues themselves on the same surface [26].

103 More recently, a test that detects ATP, and adenosine diphosphate (ADP) and adenosine  
104 monophosphate (AMP) was developed and is purported to be more sensitive and reliable [27].

105 Airborne particles can be detected and enumerated by other means including LASER particle  
106 counters that monitor the number of deflections and angle or amount of deflection (and hence the  
107 size of the particle) from particles passing through the measurement chamber as they are drawn  
108 through it [28,29]. While widely used in various industrial applications to monitor dusts, such devices  
109 are unable to determine if a particle is a viable spore, nonviable spore, other whole organisms, pollen,  
110 mineral grit, sawdust, skin flakes / dander, hair, animal fur, feathers, jumper/sweater fluff, etc.

111 A pilot investigation conducted in the subtropical-oceanic city, Brisbane, Australia, found no  
112 statistically significant associations between fungal spore concentrations and sub-micrometre particle  
113 concentrations [30]. This is of considerable practical nuisance in a normal inhabited house compared  
114 to perhaps an industrial clean-room or sterile pharmaceutical dispensing suite in which any such  
115 particles are detrimental and kept below prescribed limits such as the ISO 14644-1 Cleanroom  
116 Standards [31].

117 Regardless, the detection of viable fungi by culture for enumeration and identification seems an  
118 important aspect of assessing a damp building that other methods are unable to quite address. Other  
119 studies have described 'indicator' moulds to attempt to estimate how mouldy a house is [32]. This is  
120 an extension of a long-established concept in microbiology in which an 'indicator organism' is used  
121 to determine originally if a sample is positive for faeces in which many pathogens may not be present,  
122 and are often difficult to detect even when present, and thus indicator organisms are used instead  
123 that are known to virtually always be present in faeces and are more easily and reliably detected, but  
124 may not actually be pathogenic themselves. In this case the indicator moulds were used to determine  
125 that there was a correlation between noted dampness, visible signs of mould and damage, and  
126 detectable mouldiness [32]. A study of dust extracted from carpets and rugs in many houses in  
127 Wallaceburg, Ontario, Canada, found that *Alternaria alternaria*, *Aureobasidium pullulans*, *Eurotium*  
128 *herbariorum*, *Epicoccum nigrum*, *Aspergillus versicolor* and *Penicillium chrysogenum* were present in 50%

129 or more of the samples analysed using Rose Bengal agar medium (RBA) with antibiotics, with and  
130 without 25% glycerol, however [33].

131 Various studies have used various media for various purposes. A study of 80 not-notably-  
132 mouldy living areas and 14 notably-mouldy rooms in Germany used dichloran-18%-glycerol agar  
133 (DG18) and malt-extract agar (MEA) media [32]. While the study did draw a correlation, it remains  
134 to be seen that these are the ideal media for these types of studies given they appear to be used more  
135 by tradition than their demonstrated suitability for use in a variety of conditions, locations and  
136 climates, or the specific purpose of assessing indoor air quality. DG18 is used as a selective media for  
137 xerotolerant and mesophilic organisms given its low water-activity ( $a_w$ ) courtesy of its high  
138 salt/solute content [34].

139 MEA media have been used for some 100 years at least, presumably because of its relative low  
140 cost and the high availability of malt extract, and presumably the likely common utilisation of the  
141 dominant sugar, maltose, by organisms rotting or fermenting grains. This was hence a likely subject  
142 of interest to early microbiologists, farmers, bakers and brewers. It is also known that some brewing  
143 / baking yeast (*Saccharomyces cerevisiae*) strains have various utilisation of maltose [35]. It however  
144 remains to be seen that the range of various other fungi growing in other micro-environments and  
145 ecological niches including skin, compost, rotting leaf-litter and damp cardboard or carpets in water  
146 damaged buildings (WDB) would also utilise maltose given its likely typical absence.

147 A study of 64 homes in the UK used Sabouraud 4% glucose chloramphenicol agar media (SabC,  
148 or Sabouraud dextrose agar with chloramphenicol, SDAC) via an Andersen 6-stage sampler, and did  
149 establish a correlation between visible mould and detected mould, albeit with self-noted wide  
150 variance, and noted concerns about the variability of indoor air velocity and activities acting to  
151 suspend dusts and hence increase data uncertainty [36].

152 Sabouraud media was originally formulated well before the discovery of antibiotics for the  
153 cultivation of dermatophyte fungi associated with skin, nail, oral, respiratory and urogenital  
154 conditions. This required a medium able to reliably grow a range of fungi but ideally not the vast

155 number of otherwise harmless resident bacteria, and without the use of antibiotics given the era of  
156 development. Given that a large range of bacteria do not grow well in somewhat acid media but  
157 relatively many fungi do, the original formulation employed an acidic pH plus the fairly universal  
158 energy source, glucose, and a general amino acid / peptide supplement, peptone, made from a digest  
159 of proteins from various sources, such as Mycological Peptone Powder (Oxoid, LP0040), among  
160 others. A study comparing variations of Sabouraud recipes for the isolation of fungi from the sputum  
161 of patients with cystic fibrosis found that a slightly lesser amount of glucose (16.7 g/L) plus yeast  
162 extract (30 g/L) and peptone (6.8 g/L) adjusted to pH 6.3 and including a range of antibiotics was the  
163 most sensitive medium tested for that specific application [37], but remains to be seen regarding  
164 indoor/outdoor airborne fungi.

165 Other media commonly used includes DG18, with dichloran added to limit the spread of some  
166 fast-growing fungal colonies, limiting their diameter [38] and reducing the problem of covering over  
167 other, smaller colonies obfuscating them and making identification and enumeration difficult. DG18  
168 has a relatively low  $a_w$  via the inclusion of salts and 18% glycerol [34,39]. The dichloran appears  
169 however to affect the growth of various fungi differently, barely limiting the growth of some while  
170 completely inhibiting others [39] and is somewhat toxic and hence somewhat less than ideal for  
171 handling and disposal [40].

172 Studies comparing various media used to sample indoor air fungi found that DG18 at 25°C  
173 generally recovered significantly higher numbers c.f., MEA and/or at 37°C [41]. Other workers noted  
174 that *Cladosporium halotolerans* more often survived sudden rehydration on high  $a_w$  media after having  
175 been dried and cultured in low  $a_w$  media than did *Aspergillus niger* and *Penicillium rubens* given these  
176 tended essentially to explode on rehydration [42]. Others suggested that the lower  $a_w$  of DG18 (~0.96)  
177 c.f., other common media (~0.99) may allow better recovery of food spoilage yeasts that originally  
178 grew at low  $a_w$ , presumably having high internal osmolarity and hence at risk of explosion on high  
179  $a_w$  media [39]. For context, typical seawater has an  $a_w$  of 0.98 [43], and many sea salt-preserved foods  
180 have an  $a_w$  of around 0.95 [44].

181 Studies of dust-borne fungi in houses using media including DG18 suggested that spores may  
182 be unable to grow in culture for various reasons including inappropriate nutrients, temperature or  
183 inhibitors, and hence yielding only loose associations in numbers of mould detected in notably-  
184 mouldy and non-mouldy houses [45,46]. Given that DG18 was originally developed to enumerate  
185 xerophilic foodborne moulds and yeasts this is unsurprising [34] and it was also found that it was  
186 less able to reliably culture various food spoilage fungi compared to other newer media and hence is  
187 not now recommended even for this purpose [39].

188 Rose Bengal medium is also used [38,39], being both a selective and differential medium in that  
189 the Rose Bengal dye is taken up by fungi more than other organisms and hence becoming pink/red  
190 in colour, but has the notable problem of the dye becoming toxic when exposed to light [47] and hence  
191 likely introducing greater variability in results. This is not an uncommon effect of dyes [48]. This  
192 medium appears useful more for the selection of mesophilic or xerophilic/xerotolerant fungi in a  
193 sample rather than the enumeration/estimation of the entire range of fungi including those requiring  
194 high  $a_w$ , such as those found in a recently water-damaged building (WDB). There is evidence of a  
195 shift in fungal ecology between the outdoor environment, not visibly mouldy dwellings and visibly  
196 mouldy dwellings, becoming less relatively diverse presumably because of the overgrowth of fungi  
197 especially suited to the dwelling's exact dampness, humidity, temperature, etc. [49,50].

198 Some moulds found in WDB such as *Stachybotrys chartarum atra* and *Chaetomium globosum*  
199 require very high  $a_w$ , nearing total saturation, and may substantially lose their viability soon after  
200 collection from their active-growth site, and are relatively very slow growing, very often being totally  
201 obscured by faster-growing 'early coloniser' mould like *Penicillium*, *Aspergillus*, *Ulocladium*, etc., that  
202 that tend to spread over them [50]. Thus, a low  $a_w$  media may fail to detect these important indoor  
203 fungi.

204 A range of other media are also occasionally used for fungi for various objectives, including the  
205 passaging/sub-culturing of reference strains that have already been isolated and purified, and  
206 especially plant-borne pathogens (potato-dextrose agar, PDA) [51], food-spoilage fungi (DRBC,



207 PCAC, TGYC, DG18) [39] or for selection/identification of fungi and bacteria able to utilise sucrose  
208 and inorganic nitrogen (Czapek-Dox Agar) [52] or enriching for specific subsets of microorganism  
209 populations (tap-water cellulose agar) [53], etc., which are hence significantly different from the  
210 objective of best estimating the numbers of viable fungi associated with WDB and normal  
211 indoor/outdoor airborne fungi.

212 The use of variously enriched media has been explored and does have some popularity among  
213 mycologists, including the addition of minerals and/or vegetable juices such as the commercially  
214 available 'V8® Original' juice by the Campbell Soup Company, a blend of eight vegetables including  
215 mainly tomato juice, with the notion that there is some factor that enhances the growth and detection  
216 of fungi, albeit plant pathogens [32,50,54,55]. Some supplements such as molasses, V8® juice, coconut,  
217 urea and ammonium variously affected the production of conidia, sclerotia and aflatoxins by  
218 *Aspergillus flavus* CA43 [56]. Other workers reported that the numbers of fungi recovered from houses  
219 varied over time when using media including Rose Bengal, MEA, V8 and DG18 agar that had an at  
220 least approximately 20% coefficient of variation [57].

221 The inclusion of anti-bacterial antibiotics in selective media for culturing fungi is now common  
222 depending on the application as bacteria and fungi compete for the same resources for their growth  
223 and hence affect the growth of other colonies nearby by either using limited resources faster and more  
224 effectively thus leaving little for competitors, or actively secreting substances that inhibit their  
225 growth, of which the antibiotic drug penicillin is a notable example, secreted by some strains/types  
226 of *Penicillium chrysogenum* mould in particular [58,59].

227 Some bacteria are known to secrete antifungal and/or antibacterial antibiotic compounds  
228 including chloramphenicol (chloromycetin), secreted by *Streptomyces venezuelae*, a Gram-positive soil  
229 bacterium [60]. Other notable findings were made during the development of antibacterial drugs [61].

230 Various *Lactobacillus* bacteria species are also known to have an antifungal effect against a range  
231 of fungi associated with vaginitis, onychomycosis and/or food spoilage [62,63]. *Bacillus subtilis*  
232 bacteria strains and other *Bacilli* have also been found with antifungal activity [64,65]. Several

233 commercial preparations of probiotic capsules promoted as of benefit to people with various  
234 gastrointestinal complaints such as irritable bowel syndrome (IBS), abdominal pain/discomfort,  
235 flatulence/bloating, include a significant number of live/viable bacteria species noted as having  
236 antifungal activities such as *L. plantarum*, *L. casei*, *L. rhamnosus* and others [66].

237         Given that bacteria exist in vast numbers in ordinary topsoil, dusts, on skin, dander and hence  
238 the normal indoor environment, and they can affect the growth of fungi, antibiotics are often added  
239 to media used to analyse environmental samples. This is of less concern for media used to analyse  
240 typically sterile samples such as body tissues, blood and cerebrospinal fluid. Their relatively recent  
241 development has also meant that old media formulations did not include them, being either very  
242 expensive, not discovered yet, or often simply not stable enough to be autoclave sterilised at 121°C  
243 or stored in aqueous gel solution for a practical time period, or both, and penicillin is an example of  
244 this [58] as also are other labile antibiotics [61] in contrast to the bacterially produced anti-bacterial  
245 antibiotic chloramphenicol that is far more stable and hence suitable for such use [60].

246         It is also the case that while some bacteria can cause severe infections and presumably allergies  
247 when present in number in perhaps a formerly damp house, they are yet to be demonstrated as being  
248 airborne in quite the same manner and number that moulds and some other fungi are, which are  
249 usually well-adapted to this mode of dispersal [67–70].

## 250 **2. Materials and methods**

251 *Sabouraud / SabCG medium agar*: as indicated, either pre-made complete Sabouraud Dextrose  
252 Agar powder (Oxoid CM0041, 65 g/L), mixed into cold reverse-osmosis (RO) purified water, adjusted  
253 to pH 5.6 ±0.2, autoclaved (121°C, 15 min, jacket off, no vacuum pre- or post-autoclave), cooled before  
254 adding 100x chloramphenicol-gentamycin stock (100xCG: 5 mg/mL chloramphenicol (Sigma C0378)  
255 in 50% ethanol, 40 mg/mL gentamicin (Pfizer / DBL / Pharmacia), hence 10 mL/L) before pouring.  
256 Otherwise where indicated, made 'from scratch' from individual components, being mycological  
257 peptone powder (Oxoid LP0040, 10 g/L), glucose powder (APS/AJAX, 40 g/L), bacteriological agar  
258 powder (Oxoid LP0011, 15 g/L) mixed into cold RO water to 1 L, adjusted to pH 5.6 ±0.2, autoclaved,  
259 cooled, with or without 100xGC addition as indicated then poured.

260 *PDA potato dextrose agar*: Pre-made complete PDA powder (Oxoid CM0139, 39 g/L) mixed into  
261 cold RO water to 1 L, pH adjusted, autoclaved, cooled, with or without addition of 10 mL/L of 100xCG  
262 as indicated then poured.

263 *V8 media agar with chloramphenicol and gentamycin (V8c)*: V8® Original vegetable juice (Campbell  
264 Soup Company, Campbell's Soup Australia, Lemnos, Victoria, 200 mL), calcium carbonate (Sigma, 2  
265 g), bacteriological agar powder (15 g), mixed into cold RO water to 1 L, autoclaved, cooled, addition  
266 of 10 mL/L of 100xCG then poured.

267 *Dichloran 18% glycerol media agar with chloramphenicol and gentamycin (DG18c)*: Pre-made  
268 dichloran glycerol agar base powder (Oxoid CM0729, 31.5 g), glycerol (Sigma, 176 mL) mixed into  
269 cold RO water to 1 L, autoclaved, cooled, addition of 10 mL / L of 100xCG added then poured.

270 *Malt extract media agar without/with chloramphenicol and gentamycin (MEA, MEACG)*: malt-extract  
271 powder (Oxoid LP0039, 34 g/L), agar (10 g/L), mixed into cold tap water, adjusted to pH 5.5 ±0.2,  
272 autoclaved (110°C, 25 min), cooled, with or without 10 mL / L of 100xCG as indicated then poured.

273 *Peptone media agar with/without chloramphenicol and gentamycin (PeptoneCG, Peptone-only)*:  
274 Mycological peptone powder (Oxoid LP0040, pH 5.3 at 2%), powdered agar and other components

275 as indicated, cold RO water, autoclaved, cooled, with or without 10 mL / L of 100xCG as indicated  
276 and then poured.

277 *Maltose agar media*: maltose monohydrate powder (Sigma M2250, 40 g/L) was added to liquid  
278 medias as indicated prior to being autoclaved, cooled, with or without 10 mL of 100xGC addition as  
279 indicated and then poured.

280 *Mineral supplement #1 (MS1) media agar*: 50xMS1 stock was prepared as 25 g CaCl<sub>2</sub>·2H<sub>2</sub>O (Sigma),  
281 RO water to 100 mL, then autoclave sterilised. MS1 medium was prepared as follows: 40 g glucose,  
282 10 g peptone, 15 g bacteriological agar, RO water to 1 L. Autoclaved, cooled to approx. 50°C, 20 mL  
283 of 50xMS1 stock added dropwise with stirring of the liquid medium, 10 mL of 100xCG stock, pH  
284 adjusted to 6.7 +/- 0.3 and then poured.

285 *Mineral supplement #2 (MS2) media agar*: 50xMS2 stock was prepared as 40 g Ammonium  
286 dihydrogen phosphate (NH<sub>4</sub>)H<sub>2</sub>PO<sub>4</sub>, 5 g Potassium Chloride KCl, 5 g Magnesium Sulphate  
287 MgSO<sub>4</sub>·7H<sub>2</sub>O, 0.1 g Ferrous Sulphate FeSO<sub>4</sub>·7H<sub>2</sub>O, 0.1 g Zinc Sulphate ZnSO<sub>4</sub>·7H<sub>2</sub>O, 0.032 g Cupric  
288 Sulphate (anhydrous) CuSO<sub>4</sub>, RO Water to 100 mL then filter sterilised (Thermo Scientific™ 597-4520,  
289 0.20 µm pore diameter). MS2 medium was prepared as per MS1 medium, but using the 50xMS2 stock.

290 *Vegetable supplements*: Tomatoes (hydroponic 'truss' variety) and celery were bought fresh from  
291 a local supermarket (Sim's IGA Supermarket, Footscray, Victoria, Australia) and each were juiced via  
292 kitchen food processor (Sunbeam). V8® Original vegetable juice (Campbell Soup Company, in UHT  
293 sterilised bottles) were similarly acquired, being a combination of tomato, beets/beetroot, celery,  
294 carrot, lettuce, parsley, watercress, spinach juice concentrates and water.

295 *Clarification of vegetable juices*: coarse filtration through clean/washed calico cloth, warming  
296 filtrate to approx. 50°C in a microwave oven, adding 1/4 volume of liquid agar stock (2% in RO water)  
297 that had been molten and cooled to approx. 50°C prior to addition, mixed then cooled to 4°C and

298 filtered through clean calico cloth using some manual pressure, settled at 4°C for 30-60 minutes in a  
299 tall jar, decanted and filter sterilised (Corning 431218, 0.20 µm pore diameter).

300 *Heat-treatment of tomato juice:* 30 mL of freshly clarified sterile tomato juice in a sterile 50 mL  
301 plastic tube with a slightly loose lid was placed in approx. 200 mL boiling water in a borosilicate glass  
302 vessel and placed in a microwave oven, gently boiling for approx. 10 minutes, then cooled. Then 1  
303 mL of each sterile supplement was added to the top of previously poured, set, room-temperature and  
304 slightly dried SabCG media plates and a sterile glass L-shaped bacteriology cell-spreader (Merck,  
305 S4522) was used to spread the liquid evenly over the entire surface and allowed to soak/dry before  
306 use.

307 *Air sampling:* QuickTake30 (SKC Biosystems) with 'SKC Biostage-400' single-stage 400-hole  
308 sampler assembly attachment as per Andersen, 1958 [17] without any attachments atop the sampler  
309 top-plate, and at 1.5 m height, approx. 2 m from buildings, with wind-speeds approx. 2-5 knots on  
310 each occasion (i.e., still air and windy days were avoided, as also rain). Typically 150 L air samples  
311 were taken in triplicate in a 'collated' sequence, being all of the first plates of each different media,  
312 then all of the second plates, then all of the third plates, to best minimise the effect of differing air  
313 velocities and wind direction shifts, local dust-raising activities, etc.

314 *Bacteria powder:* 'Double Strength Probiotic' powder in capsules (Life-space Probiotics company),  
315 containing a combination of *Lactobacillus rhamnosus* Lr-32 & GG & HN001, *Bifidobacterium lactis* BI-4,  
316 *L. plantarum* Lp-115, *Streptococcus thermophilus* St-21, *L. casei* Lc-11, *L. paracasei* Lpc-37, *B. animalis* ssp.  
317 *lactis* HN019, *B. breve* Bb-03, *B. longum* Bl-05, *L. gasseri* Lg-36, *B. infantis* Bi-26, *L. delbrueckii* ssp.  
318 *bulgaricus* Lb-87 and *L. reuteri* 1E1, in approximately that order by number. A single capsule of  
319 supposedly 64 billion CFU/capsule was opened and a fine stream of the powder was blown by small  
320 electric fan towards the QuickTake30 sampling unit while in operation approximately 1 m away. This  
321 was intended only as an excess of bacteria known to interfere with fungal growth at >17,520 CFU/m<sup>3</sup>  
322 air and hence at least one CFU for each of the 400 holes of the Andersen 400-hole sampler.

323 *CFU/m<sup>3</sup>*: The term ‘airborne CFU/m<sup>3</sup>’ is used to generally describe viable airborne mould  
324 (*Actinomycetes*, *Zygomycetes*), yeasts, presumably also other fungi possibly including mushrooms,  
325 toadstools, earth-stars, puffballs, timber brown-rot, white-rot, etc., (*Basidiomycetes* generally), fungal  
326 plant pathogens and other organisms unaffected by chloramphenicol / gentamycin, slime-moulds  
327 and antibiotic-resistant bacteria able to grow at 27°C to a size detectable after 3 days on the stated  
328 media.

329 *Lugol’s Iodine*: 50 mg/mL iodine in 100 mg/mL potassium iodide solution as supplied in a  
330 standard Gram staining kit (Magnacol Pty Ltd, UK).

331 *Data processing and graphing*: MS-Excel for Mac v16.35 (Microsoft). Analysis of variance  
332 (ANOVA) was by “Anova: Single Factor” [sic] method via Excel’s analysis tools package, as also  
333 mean and standard deviation (SD).

## 334 Results

### 335 Media tests: glucose, maltose, peptone and SabCG

336 Testing various malt-extract and maltose-based media (Fig 1) in late-January 2020 (summer) in  
337 Melbourne, Australia, indicated a significant variance in the number of CFU detected within media  
338 types relative to their means, often greater than the variation between media types. Importantly,  
339 PeptoneCG (no sugars) had fewer CFU than SabCG 'stock' (using pre-prepared complete powder)  
340 and 'from scratch' (using the same individual components used in other media), but comparable CFU  
341 to MaltosePeptoneCG and GlucoseMaltosePeptoneCG. The AgarCG and MaltoseCG were similarly  
342 very low in detected CFU, and each had fungal colonies that were similarly very poorly developed  
343 and difficult to see, in no way comparable to colonies observed on the other media, and very difficult  
344 to identify although several had *Alternaria*-like chains of dark spores at the surface despite a lack of  
345 distinct hyphae, hence definitely not the full gamut of outdoor airborne organisms, and would not  
346 normally be counted as CFU at 3 days incubation.

347

348 **Fig 1. Maltose utilisation by outdoor airborne fungi.** Media included SabCG 'premade stock' with  
349 CG antibiotics added, SabCG 'scratch' made from the individual components used in the other  
350 media, PeptoneCG (with no added sugars), AgarCG, 4% MaltosePeptoneCG and  
351 GlucoseMaltosePeptoneCG (hence 8% total sugars). Error bars are +/- 1 SD to better indicate the noted  
352 variance between three replicate plates of each medium.

353

354 One-way ANOVA analysis indicated was a significant difference between all media ( $p = 0.0089$ ),  
355 but for SabCG(stock), SabCG(scratch) and PeptoneCG, significantly more variation within groups  
356 than the variation between groups ( $p = 0.623$ ).

357 The results suggested that maltose was not commonly utilised by the fungi sampled from the  
358 outdoor air, being similar to PeptoneCG despite a noted degree of hydrolysis of maltose to glucose.  
359 The variation was quite significant and hence the association was not very strong at the number of  
360 replicate plates used per experiment.

361 That the PeptoneCG medium showed appreciable numbers of CFU was somewhat surprising  
362 as the standard understanding is that fungi typically require carbohydrates. The standard SabCG  
363 with 2-4% glucose seems OK for practical purposes, but the 4% (the standard formula of many years)  
364 is likely slightly more useful in comparisons with historical data.

365 That the GlucoseMaltosePeptoneCG was comparable to MaltosePeptoneCG and PeptoneCG  
366 was curious as it was expected to be similar to SabCG. It was noted that this would have been 8%  
367 sugars, double the standard 4% and hence possibly an effect of higher osmolarity, and/or catabolite  
368 repression.

369 MEA and maltose media without added glucose did have a detectable amount of glucose after  
370 autoclave sterilisation via test (Accu-Chek Mobile U1, Roche). Tests indicated 7.5 - 10.2 mM glucose  
371 in maltose-based media, and over 55-100 mM in MEA, and no detectable glucose in fresh maltose in  
372 cold RO water at approximately 100 mg/mL.

373 Hence there was a degree of hydrolysis of maltose into glucose likely during autoclave  
374 sterilisation at 121°C for 15 min, plus warm-up and cool-down time, and time at approx. 50-70°C  
375 during pouring. It was originally intended that the maltose solution be filter-sterilised and added to  
376 cooled liquid agar media, but this was not the case and instead this experiment was used mainly to  
377 demonstrate that when maltose is in a media, it does hydrolyse to glucose to a physiologically  
378 significant degree during normal autoclave sterilisation. The noted glucose concentration suggested  
379 approximately 1.8 g/L maltose had hydrolysed out of 40 g/L initial maltose, or 4.5%. It is also noted  
380 that normal human blood glucose concentration is approx. 5-10 mM. The presence of peptone was  
381 evidently the more critical factor for fungal growth, however.



## 382 Clarified V8® Original juice, tomato juice, celery juice agar 383 media supplements and heat-labile factor effects

384 There was no significant difference between media with or without various clarified vegetable  
385 juice extracts overlain over the top of SabCG media, and hence no significant heat labile factor nor  
386 missing vital vitamin or mineral or such supplied by these vegetables at least that enhances the  
387 detection of outdoor airborne fungi in mid-April (autumn), Melbourne, Australia (Figs 2 and 3). It  
388 was noted that uncooked tomato juice significantly changed odour when heated, going from a  
389 'grassy' fragrance to a 'tomato soup' odour, yet this had no discernible effect on numbers of CFU nor  
390 colony morphology, range of cultured organisms, etc.

391

392 **Fig 2. Media supplemented with raw or cooked vegetable juices.** SabCG (1 mL water control);  
393 TJr / TJc = 1 mL Tomato Juice, raw / cooked; V8r / V8c = 1 mL V8® Original juice, raw but supplied  
394 UHT pasteurised / cooked; CJr / CJc = 1 mL Celery Juice, raw / cooked. Each medium was tested in  
395 triplicate, and all were overlain over the top of pre-prepared SabCG media in Petri dishes.

396 **Fig 3. Images of results of raw and cooked vegetable juices.** Images of some of the resulting  
397 Petri dishes (Fig 2) after culture for illustrative purposes only. Noted typical variation in numbers  
398 and types of fungi between each plate.

399

400 Early development cycles using vegetable juices that had not been clarified at all were found to  
401 not be useful for two reasons: being impossible to filter sterilise; being difficult to see through the  
402 tomato-based media from underneath, making enumeration and identification of colonies difficult.  
403 It was also determined by Lugol's Iodine solution there was a significant amount of starch in  
404 unclarified juices that could presumably affect results by selectively advantaging organisms with  
405 amylase activity, further explored in other experiments presented below.

406 The method of adding 1 mL of clarified juices including V8® Original juice over the top of SabCG  
407 media was useful but not equivalent to the media known as 'V8 media,' being approximately 1/3  
408 strength and with glucose, peptone, chloramphenicol and gentamycin.

## 409 **V8c, DG18c and SabCG media**

410 The V8c and DG18c media (containing antibiotics chloramphenicol and gentamycin, GC) were  
411 compared with SabCG via standard collection of airborne particles by 400-hole Andersen sampler  
412 outdoors in a suburban location on a winter's afternoon with a light breeze (~2 kn). Six replicate plates  
413 were used per medium, and collected in 'collated' sequence, being SabCG, DG18c, V8c, then  
414 repeating in that sequence to better allow for random changes in wind speed, direction and hence  
415 likely changes in numbers and types of viable airborne fungi over the course of the experiment, being  
416 approximately 2 h (Figs 4 and 5).

417

418 **Fig 4. Graph of V8c, DG18c and SabCG media.** 150 L outdoor air was sampled via Andersen  
419 400-hole sampler onto six replicate plates of each of V8c, DG18c and SabCG agar media then  
420 incubated at 27°C for 3 days.

421 **Fig 5. Images of SabCG, DG18c and V8c media.** 150 L of outdoor air was sampled via Andersen  
422 400-hole sampler onto six replicate plates of each of V8c (A), DG18c (B) and SabCG (C) agar  
423 media and incubated at 27°C for 3 days; (D) V8c media stained with Lugol's Iodine, staining  
424 starch dark, seen from below the media (reverse side); (E) Detail of stained V8c media plate #1  
425 from the upper side. Zones of clearing of starch was noted around some but not all colonies,  
426 with larger colonies being more associated with definite zones of clearing, smaller colonies  
427 without. Some seemingly colony-less zones of clearing may have been artefacts of wispy, low-  
428 mass colonies being rendered essentially invisible when the Lugol's Iodine solution was added,  
429 causing structures to lay flat against the gel surface.

430

431 There was a significant difference between the three different media regarding the number of  
432 airborne CFU/m<sup>3</sup> detected (P-value < 0.0003) when incubated for 3 days at 27°C.

433 The mean for SabCG was significantly highest at 242 CFU/m<sup>3</sup>, while DG18c and V8c were 151  
434 and 73, respectively. Their corresponding SD were 69, 51 and 29, respectively, or 29%, 34% and 40%  
435 of their means, respectively. There was hence little overlap in their 68% confidence interval (i.e., +/- 1  
436 SD around the mean), being 173 – 312, 100 – 201 and 45 – 102, respectively, assuming a normal  
437 distribution. The Kurtosis and skew of results for SabCG were 1.77 and 1.43, respectively, and for  
438 DG18c they were -1.89 and 0.66, respectively, and for V8c they were -0.54 and -0.03, respectively, and  
439 hence generally normal or only mild skew for DG18c and V8c, but significant for SabCG results, while  
440 Kurtosis was acceptable for each medium [71].

441 Additionally, the V8c medium was notably difficult to see through, being red in colour and  
442 nearly opaque and hence difficult to quickly observe the reverse / underside of many colonies,  
443 normally very useful in identifying/differentiating *Cladosporium* spp., c.f., *Aspergillus*, *Penicillium* spp.

444 It was also noted that the V8c medium had faint zones of clearing around some colonies but not  
445 all, and nearly always the colonies with clearing were large compared with colonies without zones  
446 of clearing (Fig 5E). This clearing was found to be due to the localised lack of starch in the media, as  
447 determined by flooding the plates with Lugol's Iodine that stains starch dark, and hence likely due  
448 to digestion of the starch by some but not all organisms, and the organisms digesting starch growing  
449 more rapidly than those not doing so. The standard V8 agar medium formula does not include simple  
450 sugars such as glucose, nor peptone or similar alternative energy sources in any great abundance  
451 given V8® Original juice is stated as having 3.3 g/100 mL carbohydrates, of which 2.7 g/100 mL are  
452 sugars, 0.8 g/100 mL protein and 1.0 g/100 mL 'dietary fibre.'

453 The DG18c medium did cause the colonies that grew to grow at a somewhat similar rate, and  
454 hence the colonies were more consistent in size at three days, but were quite often under-developed

455 compared with SabCG, being without good maturation of spores, sporulating structures and typical  
456 colouration thus making identification more difficult / time-consuming.

457 It was also noted that the condensation from the DG18c was quite sticky, having significant  
458 amounts of glycerol presumably picked up while running over the gel that hence did not dry prior  
459 to, during or after sample collection. This caused one plate to become contaminated with a significant  
460 number of yeast colonies, causing it to be rejected from the data set. Typically, the condensate on the  
461 Petri dishes of other media without glycerol merely dry during the sampling of 150 L air, as also the  
462 media itself, typically visually apparent by the 400 dimples in the gel surface corresponding to the  
463 holes in the 400-hole Andersen sampler top-plate. The pattern of dimples is useful in determining  
464 that the bottom dish with media has not rotated during sampling due to vibrations from the air-pump  
465 as this affects the statistical calculations that are based on the assumption that a hole is either negative  
466 for growth (0 CFU), or has one or more viable CFU, and hence appears positive for growth despite  
467 possibly having multiple original viable CFU deposited on the gel surface.

468 It is unclear if the winter season may have caused a shift towards more high- $a_w$ -tolerant  
469 organisms, c.f., hot dry presumably lower  $a_w$  seasons, and hence higher apparent numbers in the high  
470  $a_w$  SabCG medium cf. the lower  $a_w$  DG18c. Melbourne, Australia tends to have fairly dry, mild  
471 winters.

472 The use of six replicate plates was found to be useful (c.f., three) given the noted significant  
473 variation presumably due to the combination of the inherent uncertainty in the 400-hole Andersen  
474 collection method, and the uncertain nature of wind currents and weather. Repeating the experiment  
475 in other seasons is being considered as also during/after various weather events and conditions.

## 476 **Media tests: MEA, PDA with/without antibiotics, and** 477 **mineral supplements MS1, MS2**

478 There was no great difference in numbers of outdoor airborne fungi collected early-September  
479 (early spring) in Melbourne, Australia, between various mineral supplements and other media such  
480 as PDA or MEA, compared with SabCG (Figs 6 and 7). The variation between media groups was  
481 generally less than the variation within each group, but having the CG antibiotics present facilitated  
482 enumeration and identification of organisms.

483 Chloramphenicol / Gentamycin (CG) was useful in reducing numbers of bacterial colonies to  
484 zero, increasing the confidence in the identification of yeast colonies that usually look similar (shiny,  
485 glabrous, usually small, round colonies; Fig 7). Also the fungal colonies were more regular in shape,  
486 tending to have a rounded circumference, cf. irregular colonies with 'holes' and scalloping from  
487 bacterial colonies growing where the fungal colony would otherwise be, and fungal colonies having  
488 more regular colours, appearance, sporulation/fruitlet bodies, etc., presumably due to not having to  
489 actively respond to competing bacteria nearby, or passively via the drain on available resources in  
490 the local media.

491

492 **Fig 6. Effect of antibiotics in various media vs bacteria powder challenge.** Mineral supplemented  
493 medias with CG antibiotics (MS1, MS2), other medias with antibiotics (SabCG+, MEACG+, PDACG+),  
494 and without antibiotics (MEA-, PDA-), seeded with airborne bacterial powder during sampling 150  
495 L outdoor air, then incubated at 27°C for 3 days.

496

497 **Fig 7. Visible effects of bacterial growth on fungi.** Images of Petri dishes (Fig 6) seeded with bacteria  
498 powder while drawing 150 L outdoor air: (A) at 24 hr, 27°C, MEA (left) shows many bacterial colonies  
499 in the pattern of the 400-hole top-plate, and MEACG (right) showing no colonies due to CG  
500 antibiotics. Fungal colonies are not typically visible until 48 hrs, and not typically enumerated nor

501 identified until 72 hr; (B) Example of MEA after 72 hr, 27°C, showing the small bacterial colonies in  
502 the 400-hole plate pattern. Fungal colonies were typically somewhat different to colonies on MEACG,  
503 having visibly different morphologies and colours, e.g., *Penicillium* spp. colonies were typically  
504 flatter, smaller, with scalloped edges and the spores were pale and at a delayed state of  
505 growth/development, while other fungi remained very sparse, spreading without apparently  
506 sporulating and hence making identification very difficult; (C) Example of results at 72 hr, 27°C, with  
507 MEA (top row) and MEACG (bottom row), with notably different colony colours and morphologies  
508 with/without CG antibiotics; (D) Example of typical colony morphologies on MEACG and other  
509 media with antibiotics such as SabCG, having better maturation, conidia development, colouration  
510 and overall more consistent colony shape thus aiding identification and enumeration.

511

512 Mineral supplements MS1 and MS2 caused the media to go cloudy, which was less than ideal  
513 for counting and identification purposes. This cloudiness occasionally lessened over time and/or  
514 occasionally when colonies grew nearby, forming halos of clear areas presumably due to changes in  
515 pH due to atmospheric CO<sub>2</sub> and/or biological processes and fermentation products also including  
516 CO<sub>2</sub>, and also likely ammonia, organic acids, etc.

## 517 **Various glucose concentrations of media vs airborne fungal** 518 **detection**

519 There is some small degree of difference in numbers of CFU (and their colony morphology)  
520 between SabCG media with different concentrations of glucose, with possibly a more ideal  
521 concentration being about 2% cf. the standard 4% (Figs 8 and 9). The effect is small, however, and  
522 would be unlikely to significantly influence counting or identification. There is little effect over the  
523 tested range from 1% to 8%, as predicted from the estimated  $a_w$ . There was some effect noted in the  
524 peptone-CG-only medium, but even then it seems the majority of airborne fungi able to grow at 27°C  
525 within 3 days are able to substantially grow and sporulate without a sugar source, using the peptone  
526 as an energy and nitrogen source to complete their life-cycle, at least when sampled in early-February  
527 (summer), Melbourne, Australia. Glucose seemed to generally be of benefit, but some experiments  
528 suggested a possible suppression of growth at high sugar concentrations, initially hypothesised to be  
529 a catabolite-repression and/or high osmolarity / low  $a_w$  effect.

530

531 **Fig 8. Various media glucose concentrations graph.** Graph of CFU/m<sup>3</sup> air (from 150 L air sampled)  
532 vs media with various glucose concentrations. SabCG stock is 4% glucose. The colonies on the  
533 Glucose-CG (no peptone, 4% glucose) medium were very under-developed and not strictly  
534 comparable with those on other media. Colonies on Peptone-CG were similar to those on SabCG 1%,  
535 2%, 4% and 8% glucose.

536

537 **Fig 9. Images results of various glucose concentrations.** Images of Petri dishes after culture as used  
538 in Fig 8: (A) Column at leftmost, Stock SabCG; second left, glucose-CG (colonies virtually invisible  
539 and very under-developed), third-left, peptone-CG, fourth-left / rightmost, SabCG 1% glucose; (B)  
540 Column at leftmost, SabCG 2% glucose, second-left, SabCG 4% glucose, third-left / rightmost, SabCG  
541 8% glucose.

## 542 **Flame sterilisation/sanitisation of 400-hole Andersen air** 543 **sampling top-plate**

544 Dousing the aluminium Andersen 400-hole air sampling top-plate with alcohol and flaming it  
545 did effectively sterilise or at least sanitise it of significant numbers of dry viable *Penicillium* spores  
546 placed there (Fig 10). This was not entirely expected because it was presumed the heat would be  
547 insufficient to raise the temperature of the metal above that required for significant killing for long  
548 enough to do so. It is known that aluminium has a high thermal conductivity and is often used in  
549 heat-sinks and cookware. It was also noted that some charred debris and possibly inorganic grit was  
550 often left behind, however, which seemed to accumulate in the quite narrow holes, reducing air flow  
551 and the number of 'open holes,' critical to the operation of the Andersen 400-hole sampler.

552

553 **Fig 10. Flame-sanitisation of Andersen 400-hole top-plate.** (A) Photograph of results of samples  
554 taken by swab from SKC BioStage 400-hole Andersen top-plate doped with an excess of viable dry  
555 *Penicillium chrysogenum* spores; (B) Sample after top-plate was liberally doused with common  
556 household methylated spirits but not ignited; (C) Sample after top-plate was doused with alcohol  
557 and then ignited then allowed to cool for 1 minute before sampling; (D) Thermographs of flaming  
558 SKC BioStage 400-hole Andersen top-plate: top-most image was at the time of ignition (maximum  
559 estimated temperature 101.9°C); image second from top was 13 s after ignition and continuing to  
560 burn; image third from top / at bottom as 35 s after ignition at approximate time when the flames had  
561 ceased. It was noted that the temperature of the aluminium top-plate was less than 42°C at this time  
562 and was only slightly warm to the touch when repeated on other occasions without added mould  
563 spores.



## 564 Discussion

565 The use of SabCG as commonly formulated and commercially available was found to be  
566 reasonably consistent and sensitive for the detection, enumeration and identification of airborne  
567 viable fungi including a variety of moulds and yeasts found outdoors, at least in suburban  
568 Melbourne, Australia. This was used as a baseline / proxy for the indoor environment, and in the  
569 context of a relatively inexpensive, reasonably rapid and difficult to mis-read test. The medium is  
570 non-toxic and simple, having an amino-acid/peptide source widely used in microbiology and a  
571 glucose/dextrose source, and supports the growth of a wide range of organisms found in outdoor air,  
572 which do not require growth factors or such from sources such as malt or vegetable juices, and is not  
573 selective for amylase- or maltase-positive organisms, and a wide range of  $a_w$  requirements, which is  
574 useful for its intended purpose in estimating how mouldy a house is, especially those that are damp.

575 The inclusion of anti-bacterial antibiotics chloramphenicol and gentamycin appears to improve  
576 fungal colony morphology, colouration and rate of development by suppressing bacterial growth  
577 and hence making enumeration and identification faster and easier even for more experienced staff,  
578 including avoiding having to prepare a separate slide for each colony for examination at sufficiently  
579 high power magnification to determine if it is a yeast or bacterium.

580 Detection and enumeration of early-coloniser fungi such as *Penicillium*, *Aspergillus*, *Alternaria*,  
581 *Ulocladium*, *Rhizopus*, *Mucor* and yeasts may be a useful proxy for the general degree of mouldiness  
582 of a house as indicator organisms, being always present in low numbers outdoors (thus a useful  
583 control for the sampling equipment, media and culture conditions), growing rapidly and easily, are  
584 relatively easily enumerated and identified, are present in significantly elevated numbers in water  
585 damaged buildings, and may indeed cause respiratory disease directly.

586 Further experiments are planned to better analyse statistical aspects of the original 400-hole air  
587 sampling method published by Andersen in 1958 [17], as well as more meaningful analyses of real-  
588 world houses with and without known mould/moisture issues, and eventually ideally finding any

589 hypothetical correlation between mould and reported symptoms by occupants. This has been  
590 especially difficult with the great variety of different media and methods used historically, coupled  
591 with a lack of clarity surrounding the different objectives and practical considerations of estimating  
592 the mouldiness of an inhabited building, compared with more well-known but significantly different  
593 concerns for testing foodstuffs, food-preparation surfaces, surgical and manufacturing clean-rooms,  
594 pathology samples including medical, veterinary, plants, etc.

595 The use of malt-extract-based and/or starch-bearing agar media, often used for the detection of  
596 plant pathogens and the contamination of plant-derived foodstuffs, is of questionable suitability for  
597 detecting organisms saprophytically degrading organic materials found in damp houses such as  
598 carpet, paper, cardboard, plasterboard, timbers, etc., or natural micro-environments such as leaf litter,  
599 fallen logs, grass, or animal materials such as hair, wool, fur, skin flakes, leather, dander, etc. This is  
600 possibly because such household dusts and materials are unlikely to have significant amounts of  
601 starch or maltose compared with foodstuffs and germinated and/or rotting grains.

602 Maltose does hydrolyse over time and temperature, reportedly approximately 5% or so at 120°C  
603 for 1 hour [72], and supported by the results indicating approx. 4.5% after an autoclave cycle of 1 L  
604 liquid media. Malt and hence malt-extract is highly variable, being a pivotal aspect of brewing beer  
605 and whisky (or whiskey) using different grains including barley, wheat, rye and germinating them  
606 under differing conditions to cause the starch to enzymatically break down into various sugars  
607 including maltose, and then may be roasted and even smoked to impart a variety of flavours before  
608 further processing and extraction typically including concentration by boiling and evaporation, all of  
609 which have different, variable and/or un-reported durations and conditions of heat treatment. This  
610 would likely lead to significant regional and batch-to-batch variation that is not well controlled or  
611 described and may or may not have a significant effect on sampling results when attempting to  
612 compare them between groups using different media suppliers, autoclave conditions or working in  
613 different countries and/or over time.

614 Logically and practically it ought to be better to increase consistency of results by reducing  
615 batch-to-batch variability by simplifying the media, using chemically-pure glucose (dextrose), and  
616 ideally a consistent protein/peptide/amino acid source such as Mycological Peptone™ (Oxoid) or  
617 similar, and using reliable stable antibiotics such as chloramphenicol and gentamycin, as per SabCG.

618 The notion that the high  $a_w$  of the SabCG media might suppress the apparent numbers of  
619 outdoor airborne fungi by preventing the growth of numerous xerophilic organisms present, or other  
620 possible causes is not supported by the data when the low  $a_w$  media, DG18 (with antibiotics) was  
621 compared with SabCG during winter in Melbourne, Australia.

622 Other workers had noted a reduction in the viability of some common fungal spores grown  
623 under low  $a_w$  then exposed to high  $a_w$  media, putatively due to an osmotic-shock effect causing the  
624 spores to swell and explode [39,42], thus hypothetically reducing the apparent numbers of airborne  
625 fungi recovered on high  $a_w$  media such as SabCG compared with low  $a_w$  media such as DG18. This  
626 is curious given that few common fungi are markedly inhibited by high  $a_w$  [73], and because the likely  
627 highest contributors to fungal growth are high  $a_w$  materials/environments, and high  $a_w$   
628 materials/environments are the notable problem in a damp house and/or WDB. This is presumably  
629 quite different to the problems of low  $a_w$  food spoilage by xerophilic/xerotolerant organisms. Of  
630 course, in assessing a building for mould in practice it is to best achieve a reasonable compromise  
631 between detecting the full range of viable organisms possibly present, or the subset of 'indicator  
632 organisms' virtually guaranteed to be present if the building is or has recently been damp and thus  
633 mould-affected, and to do so reasonably consistently, rapidly in culture and during enumeration /  
634 identification. SabCG appeared to achieve a reasonable balance of this under the experimental  
635 conditions and using outdoor airborne fungi as a proxy for the range of organisms found in houses  
636 generally or when damp/mouldy.

637 That the V8c agar medium (with antibiotics) significantly yielded the lowest numbers of outdoor  
638 airborne fungi when compared with SabCG and DG18c media in winter in Melbourne, Australia,  
639 was interesting but not unexpected given its general paucity of simple sugars and amino acids. That

640 the largest colonies found on the V8c agar medium were always associated with a zone of clearing of  
641 the starch granules under and around it was interesting, especially when very small colonies were  
642 generally not associated with a zone of clearing. This suggests that the large colonies are able to grow  
643 because they were digesting the starch and hence at a considerable advantage in the otherwise  
644 relatively energy-poor medium.

645 The V8c and the DG18c media were hence inferior to the SabCG media for the detection of  
646 outdoor airborne fungi, at least in winter in suburban Melbourne, Australia.

647 The generally-cited incubation conditions for DG18 (25°C, 5-7 days) presented some challenges  
648 given that this is often more than the time required for many common moulds to grow to maturity,  
649 sporulate and have progeny colonies of a size and state of maturity making them appear to be the  
650 originally collected generation, albeit usually smaller but tending to appear like other slower-  
651 growing organisms, thus adding a source of bias and confusion. Similarly, other especially sparsely-  
652 growing / wispy organisms tend to spread avidly and hence cover smaller colonies, obscuring them  
653 and making enumeration and identification difficult. The longer time also presents a problem when  
654 there is a potential health-risk at a likely mouldy house, office, etc., and time for results turnaround  
655 is important. Hence the use of 3 days incubation at 27°C as standard appeared to be a reasonable  
656 compromise, being warm enough to allow the reasonably rapid growth of many organisms, but not  
657 so warm as to inhibit temperature-sensitive organisms such as *Penicillium* and *Cladosporium* species  
658 commonly found in damp houses. Many environmental organisms including some strains of plant  
659 pathogens *Eutypa lata* and *Botryosphaeria* spp. do not have good hyphal growth in culture at  
660 temperatures much above 20-24°C depending on the climate they were isolated from [74], but are not  
661 the focus of studies of indoor air quality and the determination if a house is mouldy due to water  
662 ingress.

663 In testing various media, it was tempting to use more controlled conditions such as filtered air  
664 intentionally seeded with known species of moulds, but it was thought it would be a better test of the  
665 natural world to use the likely wider range of organisms found outdoors. Additionally, in testing

666 houses and other buildings for mould, the outdoor air is always tested and compared as a control  
667 given that non-mouldy / non-WDB typically have a similar number of airborne as outdoors, but  
668 significantly mouldy / WDB have more than outdoors, albeit typically of a narrow range of organisms  
669 that grow rapidly in damp conditions on building materials. Therefore, the more important concern  
670 is to reliably and rapidly detect the likely relative shift in the range of organisms differentially rather  
671 than exhaustively/absolutely.

672       When the results of the number of outdoor airborne viable fungal CFU/m<sup>3</sup> detected by culture  
673 on standard/stock SabCG medium were compared between each different season (excepting days of  
674 low air velocity or an unusually high outlier on 22 January 2020) it was found that the means of the  
675 results for spring (Fig 6, September 2019), summer (Fig 8, February 2020), autumn (Fig 2, April 2020)  
676 and winter (Fig 4, July 2020) were 282 (SD 22), 316 (SD 30), 289 (SD 19), and 242 (SD 69), respectively.  
677 Hence the mean of the means was 282 CFU/m<sup>3</sup> (SD 30). This is interesting to note as this approximate  
678 value is often seen in practice when sampling outdoor air as a control prior to entering a building  
679 under assessment for mould, excepting adverse or unusual weather events including rain, strong hot  
680 winds, or the air sampling unit being positioned too close to or downwind of a notably mouldy  
681 building or materials removed from one, or some types of trees and wetland areas via personal  
682 observation of many hundreds of sampling occasions over many years and locations.

683       While it is possible to flame-sterilise/sanitise the 400-hole Andersen impactor top-plate, it is of  
684 questionable advantage to do so while onsite, likely having several orders of magnitude less than 1%  
685 an effect on the results even if taken from a very mouldy location to a sterile one, especially compared  
686 with the typical natural sampling uncertainty. Flaming onsite carries some practical considerations  
687 such as transporting and carrying flammable liquids, and setting fire to it between uses, frequently  
688 while wearing flammable gloves and/or disposable polyethylene overalls (e.g., Tyvek™), carrying  
689 flammable plastic bags, and often in environments with large amounts of sawdust, cardboard  
690 particles, construction materials and waste, plastic sheets used for containment cells during  
691 remediation works, paints and thinners, and sometimes quite strong air currents either outdoors, or

692 from outdoors in damaged buildings, or from blowers, air-movers, fans, air-filtering units, heaters,  
693 air-conditioning units, dehumidifiers, etc., within buildings often without functional smoke alarms,  
694 fire-fighting equipment and functional fire suppression sprinkler systems, proper fire escapes, or  
695 often floors, stairs and power.

696 Previous experience found that collection efficiency was impaired when the top-plate was wiped  
697 with cleaning solutions that left any residue such as benzalkonium chloride and detergents, and  
698 hence the regular use of hot RO water and an ultrasonic bath was implemented to clean the holes,  
699 keeping them open and keeping air flow consistent between uses. It was also found that the number  
700 of CFU detected by the 400-hole sampler was not significantly affected by having been used  
701 previously in a very mouldy location, such as sampling a 'clean' location immediately after a location  
702 with high numbers of viable airborne moulds via personal observation of many such sampling  
703 occasions. This was not surprising given that the holes are 0.25 mm diameter, and approximately 1.5  
704 mm deep. And thus all 400 holes together have a collective void-volume of less than 30  $\mu\text{L}$ . Hence,  
705 for there to be a reasonable chance of increasing a subsequent air sampling run by one single CFU  
706 there would have to be one CFU within the 30  $\mu\text{L}$  of void-volume from the previous air sampling  
707 run, which would therefore be 1 CFU/30  $\mu\text{L}$  which is  $30 \times 10^{-3} \text{ L}$ , and hence  $3.3 \times 10^7 \text{ CFU/m}^3$ , which  
708 is very far beyond the typical 282 CFU/m<sup>3</sup> (343 – 222 at +/- 2SD, hence the 96% confidence interval  
709 based on the mean SD) found outdoors normally and even far beyond the lower limit of the highest  
710 risk category commonly cited, 5,000 CFU/m<sup>3</sup> by many orders of magnitude. It was therefore  
711 concluded the net effect of sampling even the likely highest possible degree of viable airborne fungal  
712 contamination without cleaning the 400-hole top-plate would be significantly less than 1% and hence  
713 negligible especially considering the noted greater variation in results from samples taken in the same  
714 location using the same media, etc., presumably due to the random nature of airborne mould particles  
715 and sampling in general. Prudence and habit, however, meant that the 400-hole top-plate was wiped  
716 top and bottom with a commercially available single-use disposable lens cleaning wipe that comes  
717 pre-soaked with isopropanol to remove dusts rather than sterilise or sanitise the top-plate. This is

718 reflected in sampling protocols for various airborne microorganisms including fungi and bacteria via  
719 the same Andersen sampling apparatus, using isopropanol merely to clean the sampling plate  
720 without setting fire to it [75], and ideally the pump unit, hands/gloves and other test equipment  
721 potentially exposed to mould, other fungi and organisms in a notably mouldy, dirty or dusty  
722 building.

## 723 **Funding**

724 This research received no external funding.

## 725 **Acknowledgments**

726 Many thanks are given to all the staff at the Media Preparation Unit, The Peter Doherty Institute for Infection  
727 and Immunity, The University of Melbourne, Parkville/Melbourne, Victoria, Australia, with particular  
728 acknowledgements (in no particular order) to Elena Paraskeva, Kim Lai Bell, Claire Fraser and Elizabeth  
729 Trajcevska, with humble apologies to anyone I have missed.

## 730 **Conflicts of Interest**

731 The author declares no conflict of interest.

## 732 **References**

- 733 1. Hesselstine CW, Shotwell O. New methods for rapid detection of aflatoxin. *Pure Appl*  
734 *Chem.* 1973;35: 259–266. doi:10.1351/pac197335030259
- 735 2. Committee on Environmental Health. Spectrum of Noninfectious Health Effects From  
736 Molds. *PEDIATRICS.* 2006;118: 2582–2586. doi:10.1542/peds.2006-2828
- 737 3. Kazemian N, Pakpour S, Milani AS, Klironomos J. Environmental factors influencing  
738 fungal growth on gypsum boards and their structural biodeterioration: A university  
739 campus case study. *PLOS ONE.* 2019;14: e0220556.  
740 doi:10.1371/journal.pone.0220556
- 741 4. Wirth F, Goldani LZ. Epidemiology of *Rhodotorula*: An Emerging Pathogen.  
742 *Interdiscip Perspect Infect Dis.* 2012;2012. doi:10.1155/2012/465717
- 743 5. Stetzenbach L, Amman H, Johanning E, King G, Shaughnessy RJ. Microorganisms,  
744 Mold and Indoor Air Quality. American Society for Microbiology ASM; 2004.  
745 Available: [www.asm.org/ccLibraryFiles/FILENAME/000000001277/laq.pdf](http://www.asm.org/ccLibraryFiles/FILENAME/000000001277/laq.pdf)
- 746 6. IICRC. ANSI/IICRC Standard and Reference Guide for Professional Mold  
747 Remediation s520. Institution of Inspection, Cleaning and Restoration Certification;  
748 2015.
- 749 7. Heselstine E, Rosen J, editors. WHO guidelines for indoor air quality: dampness and  
750 mould. WHO, Denmark; 2009. Available:  
751 [http://www.euro.who.int/en/publications/abstracts/who-guidelines-for-indoor-air-](http://www.euro.who.int/en/publications/abstracts/who-guidelines-for-indoor-air-quality-dampness-and-mould)  
752 [quality-dampness-and-mould](http://www.euro.who.int/en/publications/abstracts/who-guidelines-for-indoor-air-quality-dampness-and-mould)
- 753 8. Environmental Health Division. Recommended Best Practices for Mold Remediation  
754 in Minnesota Schools. Minnesota Department of Health MDH; 2014.
- 755 9. Guidelines on Assessment and Remediation of Fungi in Indoor Environments. New  
756 York City Department of Health and Mental Hygiene; 2008.
- 757 10. PromptCare. The Problems with Fogging and Use of Biocides for Mold Removal. 2014.  
758 Available: [https://www.urfresh.com/wp-content/uploads/2014/01/Problems-with-](https://www.urfresh.com/wp-content/uploads/2014/01/Problems-with-Fogging2.pdf)  
759 [Fogging2.pdf](https://www.urfresh.com/wp-content/uploads/2014/01/Problems-with-Fogging2.pdf)
- 760 11. Neumeister-Kemp H, Kemp P. Australian Mould Guideline AMG. 2nd ed. 2010.
- 761 12. Assessment, Cleaning, and Restoration of HVAC Systems ACR 2004. National Air  
762 Duct Cleaners Association NADCA; 2006.



- 763 13. Kleinheinz GT, Langolf BM, Englebert E. Characterization of airborne fungal levels  
764 after mold remediation. *Microbiol Res.* 2006;161: 367–76.  
765 doi:10.1016/j.micres.2006.01.002
- 766 14. Jones CL. Mould in building disputes. *J Bacteriol Mycol Open Access.* 2018;6.  
767 doi:10.15406/jbmoa.2018.06.00216
- 768 15. House of Representatives Standing Committee on Health, Aged Care and Sport. Report  
769 on the Inquiry into Biotoxin-related Illnesses in Australia. PARLIAMENT OF THE  
770 COMMONWEALTH OF AUSTRALIA; 2018.
- 771 16. US EPA I. Mold remediation schools and commercial buildings EPA 402-K-01-001.  
772 2008. Available: <https://www.epa.gov/mold>
- 773 17. Andersen AA. New sampler for the collection, sizing and enumeration of viable  
774 airborne particles. *J Bacteriol.* 1958;76: 471–484. doi:10.1128/JB.76.5.471-484.1958
- 775 18. Bruch MK, Smith FW. Improved method for pouring Rodac plates. *Appl Microbiol.*  
776 1968;16: 1427–1428. Available:  
777 <https://www.ncbi.nlm.nih.gov/pmc/articles/PMC547672/>
- 778 19. Mann EE, Manna D, Mettetal MR, May RM, Dannemiller EM, Chung KK, et al.  
779 Surface micropattern limits bacterial contamination. *Antimicrob Resist Infect Control.*  
780 2014;3: 28. doi:10.1186/2047-2994-3-28
- 781 20. Pinto F, Hiom S, Girdlestone S, Maillard J-Y. Evaluation of the effectiveness of  
782 commercially available contact plates for monitoring microbial environments. *Lett*  
783 *Appl Microbiol.* 2009;48: 379–382. doi:10.1111/j.1472-765X.2008.02534.x
- 784 21. Hayleeyesus SF, Manaye AM. Microbiological Quality of Indoor Air in University  
785 Libraries. *Asian Pac J Trop Biomed.* 2014;4: S312–S317.  
786 doi:10.12980/APJTB.4.2014C807
- 787 22. Fekadu S, Getachewu B. Microbiological Assessment of Indoor Air of Teaching  
788 Hospital Wards: A case of Jimma University Specialized Hospital. *Ethiop J Health Sci.*  
789 2015;25: 117–122. doi:10.4314/ejhs.v25i2.3
- 790 23. Hayleeyesus SF, Ejeso A, Derseh FA. Quantitative assessment of bio-aerosols  
791 contamination in indoor air of University dormitory rooms. *Int J Health Sci.* 2015;9:  
792 249–256. Available: <https://www.ncbi.nlm.nih.gov/pmc/articles/PMC4633188/>
- 793 24. Borrego S, Lavin P, Perdomo I, Gómez de Saravia S, Guiamet P. Determination of  
794 Indoor Air Quality in Archives and Biodeterioration of the Documentary Heritage.  
795 *ISRN Microbiol.* 2012; 680598. doi:10.5402/2012/680598
- 796 25. Najotra DK, Malhotra AS, Slathia P, Raina S, Dhar A. Microbiological Surveillance of  
797 Operation Theatres: Five Year Retrospective Analysis from a Tertiary Care Hospital in

- 798 North India. *Int J Appl Basic Med Res.* 2017;7: 165–168.  
799 doi:10.4103/ijabmr.IJABMR\_281\_16
- 800 26. Shama G, Malik DJ. The uses and abuses of rapid bioluminescence-based ATP assays.  
801 *Int J Hyg Environ Health.* 2013;216: 115–125. doi:10.1016/j.ijheh.2012.03.009
- 802 27. Bakke M, Suzuki S, Kirihara E, Mikami S. Evaluation of the total adenylate (ATP +  
803 ADP + AMP) test for cleaning verification in healthcare settings. *J Prev Med Hyg.*  
804 2019;60: E140–E146. doi:10.15167/2421-4248/jpmh2019.60.2.1122
- 805 28. Met One Instruments Inc. 804 Particle Counter Final Data Sheet. Met One Instruments  
806 Inc.; 2012. Available: [www.metone.com](http://www.metone.com)
- 807 29. Met One Instruments Inc. 831 Aerosol Mass Monitor Datasheet. Met One Instruments  
808 Inc.; 2012. Available: [www.metone.com](http://www.metone.com)
- 809 30. Hargreaves M, Parappukkaran S, Morawska L, Hitchins J, He C, Gilbert D. A pilot  
810 investigation into associations between indoor airborne fungal and non-biological  
811 particle concentrations in residential houses in Brisbane, Australia. *Sci Total Environ.*  
812 2003;312: 89–101. doi:10.1016/S0048-9697(03)00169-4
- 813 31. ISO. 14644-1:2015 Cleanrooms and associated controlled environments — Part 1:  
814 Classification of air cleanliness by particle concentration. 2015. Available:  
815 [http://www.iso.org/cms/render/live/en/sites/isoorg/contents/data/standard/05/33/53394](http://www.iso.org/cms/render/live/en/sites/isoorg/contents/data/standard/05/33/53394.html)  
816 .html
- 817 32. Baudisch C, Assadian O, Kramer A. Concentration of the genera *Aspergillus*, *Eurotium*  
818 and *Penicillium* in 63- $\mu$ m house dust fraction as a method to predict hidden moisture  
819 damage in homes. *BMC Public Health.* 2009;9: 247–255. doi:10.1186/1471-2458-9-  
820 247
- 821 33. Scott JA. Studies on indoor fungi. PhD, University of Toronto, Canada. 2001.  
822 Available:  
823 [https://www.researchgate.net/publication/228855755\\_Studies\\_on\\_indoor\\_fungi](https://www.researchgate.net/publication/228855755_Studies_on_indoor_fungi)
- 824 34. Hocking AD, Pitt JI. Dichloran-glycerol medium for enumeration of xerophilic fungi  
825 from low-moisture foods. *Appl Environ Microbiol.* 1980;39: 488–492.  
826 doi:10.1128/AEM.39.3.488-492.1980
- 827 35. Jansen MLA, Daran-Lapujade P, de Winde JH, Piper MDW, Pronk JT. Prolonged  
828 Maltose-Limited Cultivation of *Saccharomyces cerevisiae* Selects for Cells with  
829 Improved Maltose Affinity and Hypersensitivity. *Appl Environ Microbiol.* 2004;70:  
830 1956–1963. doi:10.1128/AEM.70.4.1956-1963.2004

- 831 36. Aktas YD, Ioannou I, Altamirano H, Reeslev M, D'Ayala D, May N, et al. Surface and  
832 passive/active air mould sampling: A testing exercise in a North London housing estate.  
833 *Sci Total Environ.* 2018;643: 1631–1643. doi:10.1016/j.scitotenv.2018.06.311
- 834 37. Nagano Y, Millar BC, Goldsmith CE, Walker JM, Elborn JS, Rendall J, et al.  
835 Development of selective media for the isolation of yeasts and filamentous fungi from  
836 the sputum of adult patients with cystic fibrosis (CF). *J Cyst Fibros.* 2008;7: 566–572.  
837 doi:10.1016/j.jcf.2008.06.007
- 838 38. Himedia Labs. Dichloran Rose Bengal Chloramphenicol Agar (DRBC Agar) M1881  
839 Himedia Technical Data Sheet. 2020. Available:  
840 <http://himedialabs.com/TD/M1881.pdf>
- 841 39. Deak T, Chen J, Golden DA, Tapia MS, Tornai-Lehoczki J, Viljoen BC, et al.  
842 Comparison of dichloran 18% glycerol (DG18) agar with general purpose mycological  
843 media for enumerating food spoilage yeasts. *Int J Food Microbiol.* 2001;67: 49–53.  
844 doi:10.1016/S0168-1605(01)00449-4
- 845 40. Sigma-Aldrich. Dichloran 45435 MSDS 23/10/2019 CAS 99-30-9. [cited 19 Jan 2020].  
846 Available: <https://www.sigmaaldrich.com/catalog/product/sial/45435>
- 847 41. Nieguitsila A, Arné P, Durand B, Deville M, Benoît-Valièrgue H, Chermette R, et al.  
848 Relative efficiencies of two air sampling methods and three culture conditions for the  
849 assessment of airborne culturable fungi in a poultry farmhouse in France. *Environ Res.*  
850 111: 248–253. Available:  
851 [https://www.academia.edu/25522507/Relative\\_efficiencies\\_of\\_two\\_air\\_sampling\\_met  
852 hods\\_and\\_three\\_culture\\_conditions\\_for\\_the\\_assessment\\_of\\_airborne\\_culturable\\_fung  
853 i\\_in\\_a\\_poultry\\_farmhouse\\_in\\_France](https://www.academia.edu/25522507/Relative_efficiencies_of_two_air_sampling_methods_and_three_culture_conditions_for_the_assessment_of_airborne_culturable_fungi_in_a_poultry_farmhouse_in_France)
- 854 42. Segers FJJ, van Laarhoven KA, Huinink HP, Adan OCG, Wösten HAB, Dijksterhuis J.  
855 The Indoor Fungus *Cladosporium halotolerans* Survives Humidity Dynamics Markedly  
856 Better than *Aspergillus niger* and *Penicillium rubens* despite Less Growth at Lowered  
857 Steady-State Water Activity. *Appl Environ Microbiol.* 2016;82: 5089–5098.  
858 doi:10.1128/AEM.00510-16
- 859 43. Schultz C. Water activity as related to microorganisms in the manufacturing  
860 environment. *Gen Intern Med Clin Innov.* 2016;1. doi:10.15761/GIMCI.1000133
- 861 44. Biango-Daniels MN, Hodge KT. Sea salts as a potential source of food spoilage fungi.  
862 *Food Microbiol.* 2018;69: 89–95. doi:10.1016/j.fm.2017.07.020
- 863 45. Chew GL, Rogers C, Burge HA, Muilenberg ML, Gold DR. Dustborne and airborne  
864 fungal propagules represent a different spectrum of fungi with differing relations to  
865 home characteristics. *Allergy.* 2003;58: 13–20. doi:10.1034/j.1398-9995.2003.00013.x

- 866 46. Verhoeff AP, van Wijnen JH, Brunekreef B, Fischer P, van Reenen-Hoekstra ES,  
867 Samson RA. Presence of viable mould propagules in indoor air in relation to house  
868 damp and outdoor air. *Allergy*. 1992;47: 83–91. doi:10.1111/j.1398-  
869 9995.1992.tb05093.x
- 870 47. Lee YC, Park CK, Kim MS, Kim JH. In vitro study for staining and toxicity of rose  
871 bengal on cultured bovine corneal endothelial cells. *Cornea*. 1996;15: 376–385.  
872 doi:10.1097/00003226-199607000-00008
- 873 48. Broadwater D, Bates M, Jayaram M, Young M, He J, Raithel AL, et al. Modulating  
874 cellular cytotoxicity and phototoxicity of fluorescent organic salts through counterion  
875 pairing. *Sci Rep*. 2019;9: 15288. doi:10.1038/s41598-019-51593-z
- 876 49. Sylvain IA, Adams RI, Taylor JW. A different suite: The assemblage of distinct fungal  
877 communities in water-damaged units of a poorly-maintained public housing building.  
878 *PLoS ONE*. 2019;14. doi:10.1371/journal.pone.0213355
- 879 50. Andersen B, Frisvad JC, Søndergaard I, Rasmussen IS, Larsen LS. Associations  
880 between Fungal Species and Water-Damaged Building Materials  $\nabla$ . *Appl Environ*  
881 *Microbiol*. 2011;77: 4180–4188. doi:10.1128/AEM.02513-10
- 882 51. Aryal S. Potato Dextrose Agar (PDA)- Principle, Uses, Procedure & Characteristics. In:  
883 *Microbiology Info.com* [Internet]. 15 Aug 2019 [cited 19 Jan 2020]. Available:  
884 [https://microbiologyinfo.com/potato-dextrose-agar-pda-principle-uses-composition-](https://microbiologyinfo.com/potato-dextrose-agar-pda-principle-uses-composition-procedure-and-colony-characteristics/)  
885 [procedure-and-colony-characteristics/](https://microbiologyinfo.com/potato-dextrose-agar-pda-principle-uses-composition-procedure-and-colony-characteristics/)
- 886 52. Czapek-Dox Agar. [cited 19 Jan 2020]. Available:  
887 [https://catalog.hardydiagnostics.com/cp\\_prod/Content/hugo/Czapek-DoxAgar.html](https://catalog.hardydiagnostics.com/cp_prod/Content/hugo/Czapek-DoxAgar.html)
- 888 53. Hendricks CW, Doyle JD, Hugley B. A new solid medium for enumerating cellulose-  
889 utilizing bacteria in soil. *Appl Environ Microbiol*. 1995;61: 2016–2019.  
890 doi:10.1128/AEM.61.5.2016-2019.1995
- 891 54. Uppala SS, Zhou X-G, Liu B, Wu M. Plant-Based Culture Media for Improved Growth  
892 and Sporulation of *Cercospora janseana*. *Plant Dis*. 2019;103: 504–508.  
893 doi:10.1094/PDIS-05-18-0814-RE
- 894 55. Wei C-I, Swartz DD, Cornell JA. Effects of Culture Media, Exposure Time and  
895 Temperature on Near-Ultraviolet-Induced Sporulation of *Alternaria alternata*. *J Food*  
896 *Prot*. 1985;48: 316–319. doi:10.4315/0362-028X-48.4.316
- 897 56. Chang P-K, Hua S-ST. Molasses supplementation promotes conidiation but suppresses  
898 aflatoxin production by small sclerotial *Aspergillus flavus*. *Lett Appl Microbiol*.  
899 2007;44: 131–137. doi:10.1111/j.1472-765X.2006.02056.x

- 900 57. Verhoeff AP, van Wijnen JH, Boleij JS, Brunekreef B, van Reenen-Hoekstra ES,  
901 Samson RA. Enumeration and identification of airborne viable mould propagules in  
902 houses. A field comparison of selected techniques. *Allergy*. 1990;45: 275–284.  
903 doi:10.1111/j.1398-9995.1990.tb00496.x
- 904 58. Lobanovska M, Pilla G. Penicillin's Discovery and Antibiotic Resistance: Lessons for  
905 the Future? *Yale J Biol Med*. 2017;90: 135–145. Available:  
906 <https://www.ncbi.nlm.nih.gov/pmc/articles/PMC5369031/>
- 907 59. Chain E, Florey HW, Gardner AD, Heatley NG, Jennings MA, Orr-Ewing J, et al.  
908 PENICILLIN AS A CHEMOTHERAPEUTIC AGENT. *The Lancet*. 1940;236: 226–  
909 228. doi:10.5555/uri:pii:S0140673601087281
- 910 60. Ehrlich J, Bartz QR, Smith RM, Joslyn DA, Burkholder PR. Chloromycetin, a New  
911 Antibiotic From a Soil Actinomycete. *Science*. 1947;106: 417–417.  
912 doi:10.1126/science.106.2757.417
- 913 61. Heatley NG, Florey HW. An Antibiotic from *Bacterium coli*. *Br J Exp Pathol*. 1946;27:  
914 378–390. Available: <https://www.ncbi.nlm.nih.gov/pmc/articles/PMC2065827/>
- 915 62. Leyva Salas M, Mounier J, Valence F, Coton M, Thierry A, Coton E. Antifungal  
916 Microbial Agents for Food Biopreservation—A Review. *Microorganisms*. 2017;5: 37.  
917 doi:10.3390/microorganisms5030037
- 918 63. Zangl I, Pap I-J, Aspöck C, Schüller C. The role of *Lactobacillus* species in the control  
919 of *Candida* via biotrophic interactions. *Microb Cell*. 2019;7: 1–14.  
920 doi:10.15698/mic2020.01.702
- 921 64. Li J, Yang Q, Zhao L, Zhang S, Wang Y, Zhao X. Purification and characterization of  
922 a novel antifungal protein from *Bacillus subtilis* strain B29. *J Zhejiang Univ Sci B*.  
923 2009;10: 264–272. doi:10.1631/jzus.B0820341
- 924 65. Wu S, Liu G, Zhou S, Sha Z, Sun C. Characterization of Antifungal Lipopeptide  
925 Biosurfactants Produced by Marine Bacterium *Bacillus* sp. CS30. *Mar Drugs*. 2019;17:  
926 199. doi:10.3390/md17040199
- 927 66. Hungin APS, Mulligan C, Pot B, Whorwell P, Agréus L, Fracasso P, et al. Systematic  
928 review: probiotics in the management of lower gastrointestinal symptoms in clinical  
929 practice – an evidence-based international guide. *Aliment Pharmacol Ther*. 2013;38:  
930 864–886. doi:10.1111/apt.12460
- 931 67. Evans S, Martiny JBH, Allison SD. Effects of dispersal and selection on stochastic  
932 assembly in microbial communities. *ISME J*. 2017;11: 176–185.  
933 doi:10.1038/ismej.2016.96

- 934 68. Rieux A, Soubeyrand S, Bonnot F, Klein EK, Ngando JE, Mehl A, et al. Long-Distance  
935 Wind-Dispersal of Spores in a Fungal Plant Pathogen: Estimation of Anisotropic  
936 Dispersal Kernels from an Extensive Field Experiment. *PLoS ONE*. 2014;9.  
937 doi:10.1371/journal.pone.0103225
- 938 69. Lo VC, Ren Q, Pham CLL, Morris VK, Kwan AH, Sunde M. Fungal Hydrophobin  
939 Proteins Produce Self-Assembling Protein Films with Diverse Structure and Chemical  
940 Stability. *Nanomaterials*. 2014;4: 827–843. doi:10.3390/nano4030827
- 941 70. Macindoe I, Kwan AH, Ren Q, Morris VK, Yang W, Mackay JP, et al. Self-assembly  
942 of functional, amphipathic amyloid monolayers by the fungal hydrophobin EAS. *Proc  
943 Natl Acad Sci U S A*. 2012;109: E804–E811. doi:10.1073/pnas.1114052109
- 944 71. George D, Mallery P. *SPSS for Windows step by step: a simple guide and reference  
945 17.0 update*. Boston: Allyn & Bacon; 2010.
- 946 72. Woo KS, Kim HY, Hwang IG, Lee SH, Jeong HS. Characteristics of the Thermal  
947 Degradation of Glucose and Maltose Solutions. *Prev Nutr Food Sci*. 2015;20: 102–109.  
948 doi:10.3746/pnf.2015.20.2.102
- 949 73. Richard-Molard D, Lesage L, Cahagnier B. Effect of Water Activity on Mold Growth  
950 and Mycotoxin Production. In: Simatos D, Multon JL, editors. *Properties of Water in  
951 Foods: in Relation to Quality and Stability*. Dordrecht: Springer Netherlands; 1985. pp.  
952 273–292. doi:10.1007/978-94-009-5103-7\_17
- 953 74. Úrbez-Torres JR, Bruez E, Hurtado J, Gubler WD. Effect of Temperature on Conidial  
954 Germination of *Botryosphaeriaceae* Species Infecting Grapevines. *Plant Dis*. 2010;94:  
955 1476–1484. doi:10.1094/PDIS-06-10-0423
- 956 75. Lonon MK. *Bioaerosol Sampling (Indoor Air) Culturable organisms: bacteria, fungi,  
957 thermophilic actinomycetes Method 0800, Issue 1*. 1998.
- 958 76. ASTM D22 Committee. *Test Method for Categorization and Quantification of Airborne  
959 Fungal Structures in an Inertial Impaction Sample by Optical Microscopy*. West  
960 Conshohocken, PA, 2020, USA: ASTM International; 2020. doi:10.1520/D7391-20

961

## 962 **Supporting Information**

963 **S1 Tables of raw data.** These tables include CFU/plate counted, calculated CFU/m<sup>3</sup> air via Andersen,  
964 1958 with a 1.25x adjustment to the raw CFU/plate given polymer Petri dishes were used, and general  
965 categories of genera as adapted from ASTM D7391-20 section 12.3.2 [76], pertaining to Figs 1-9.

- 966 **S2 Tables, data analysis and graphs.** A MS-Excel notebook of several spreadsheets pertaining to Figs
- 967 1-9, including ANOVA analysis, means, standard deviations, and charts/graphs.

# Maltose media, effect on airborne fungal CFU (+/- 1 SD)

bioRxiv preprint doi: <https://doi.org/10.1101/2020.08.27.269704>; this version posted August 27, 2020. The copyright holder for this preprint (which was not certified by peer review) is the author/funder, who has granted bioRxiv a license to display the preprint in perpetuity. It is made available under aCC-BY 4.0 International license.

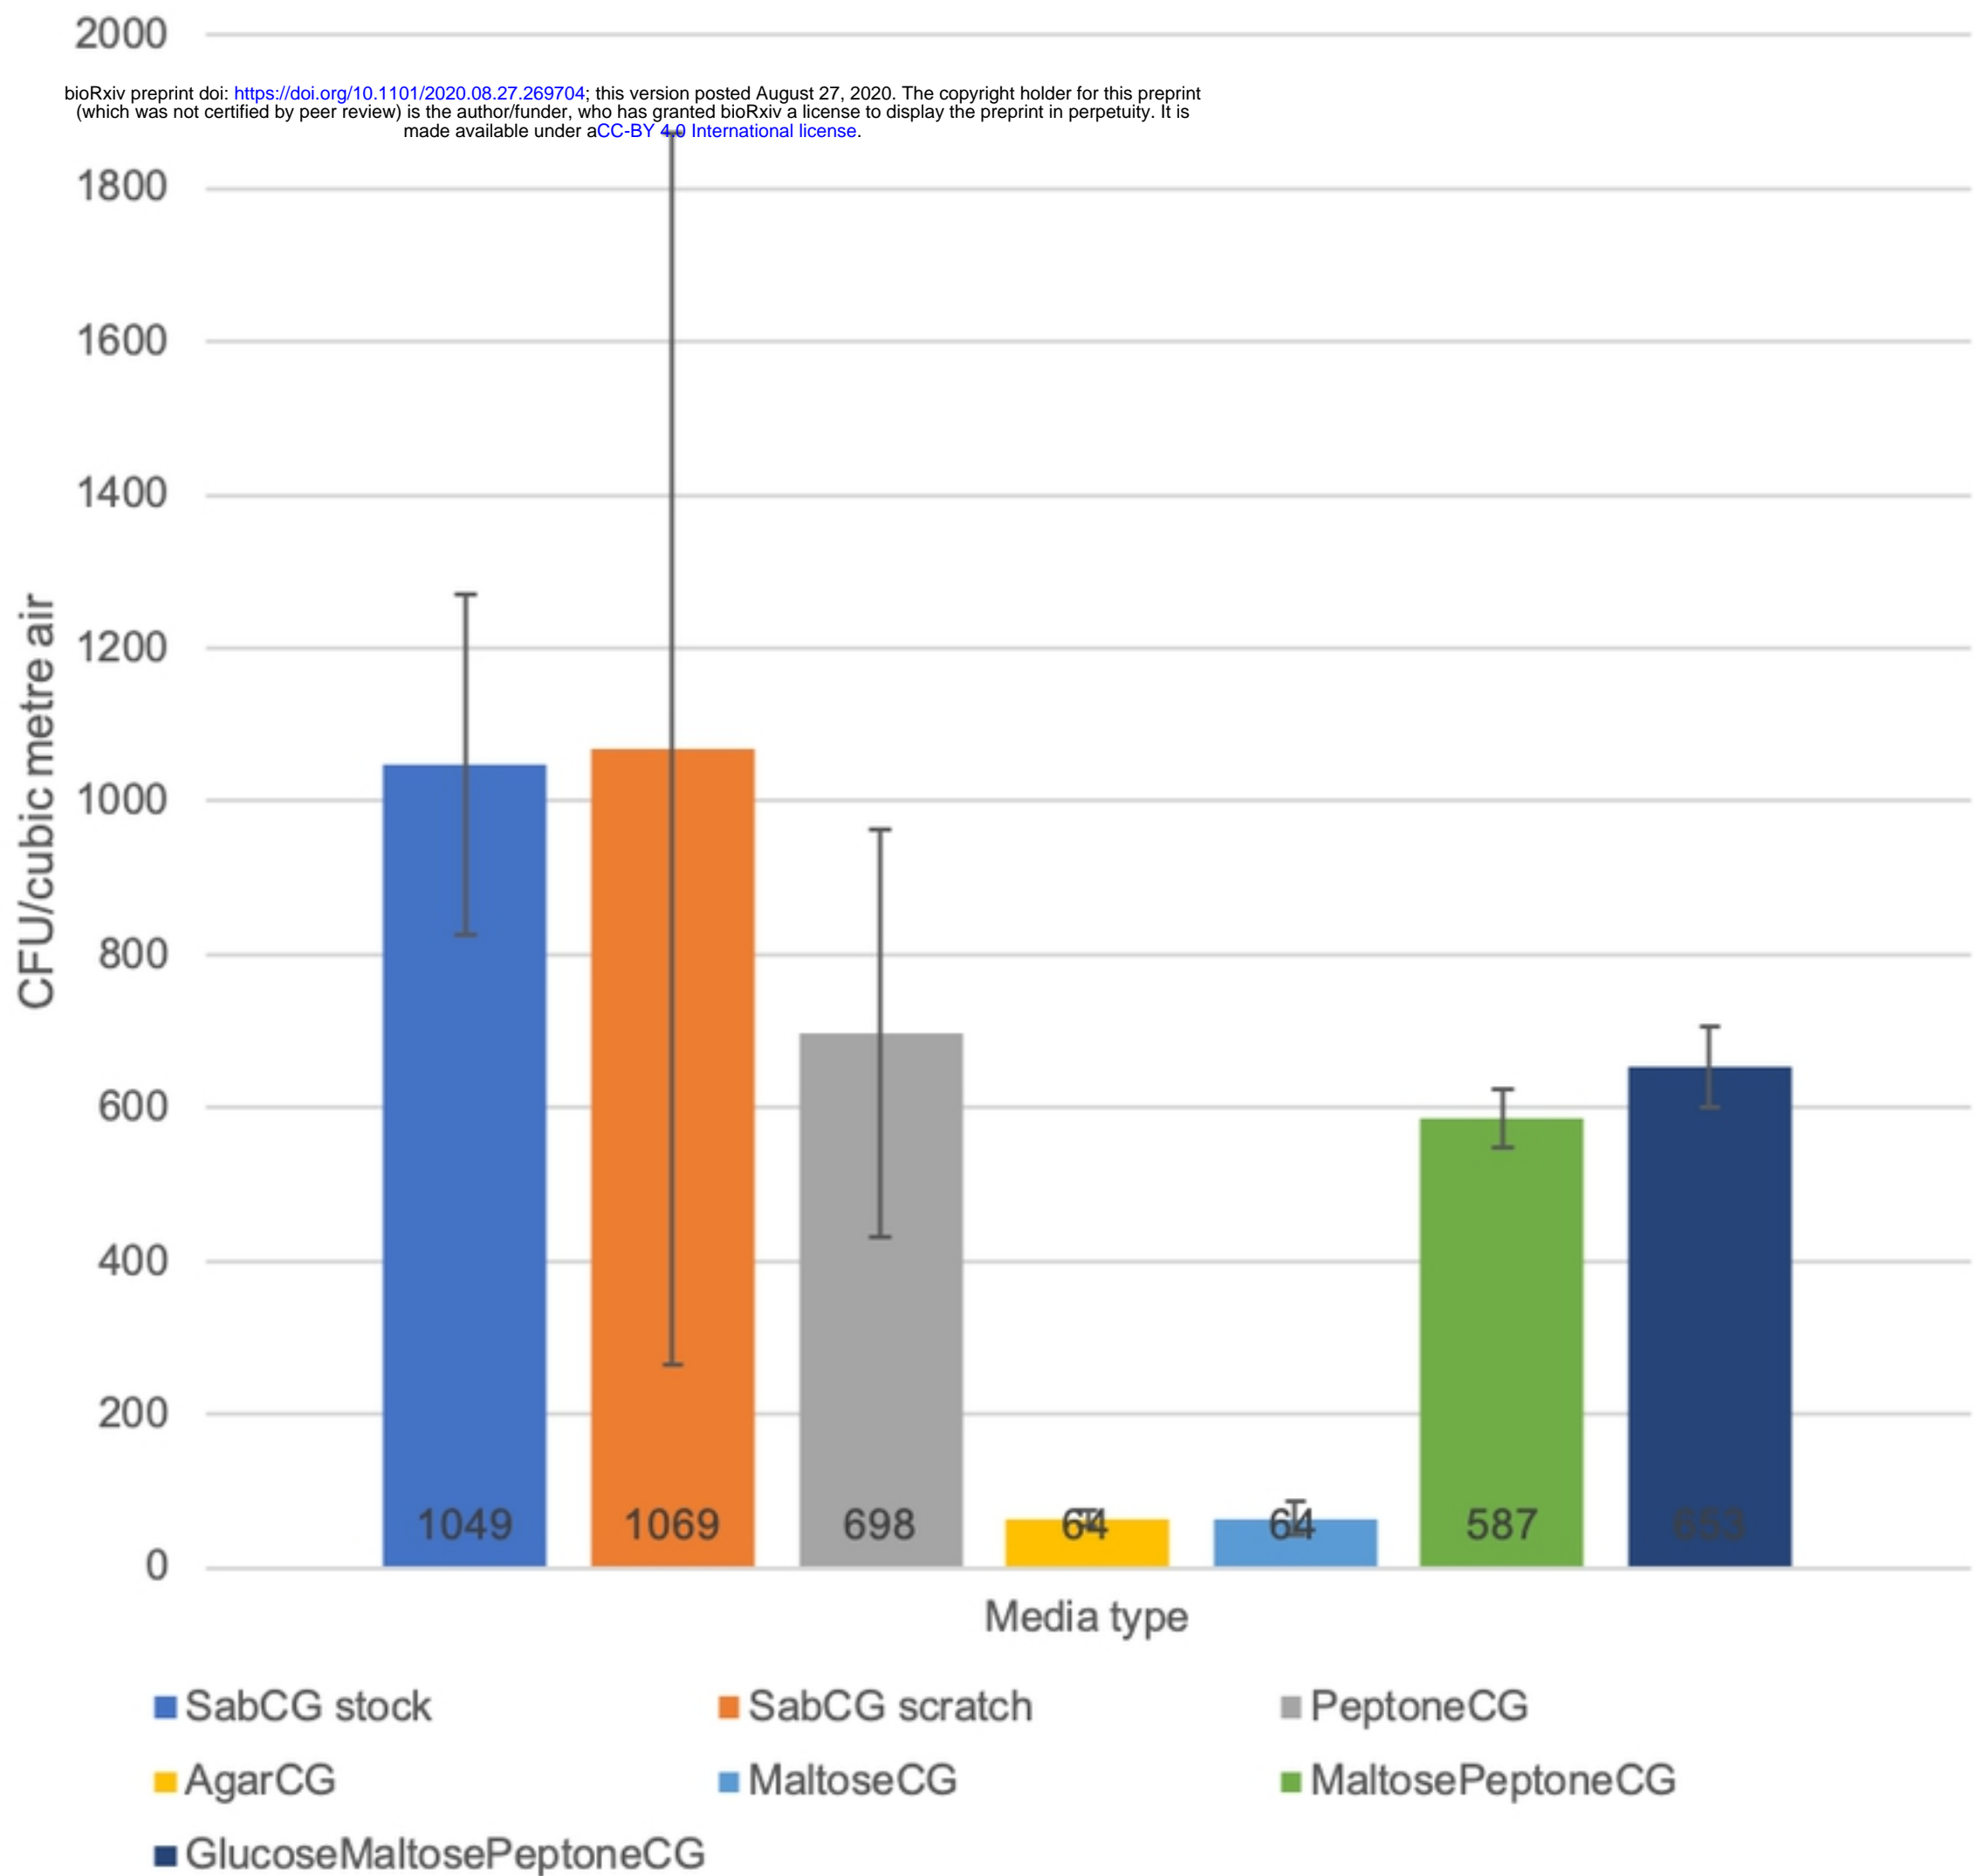

Figure 1



# Tomato, V8 and celery juice media, effect on airborne fungal mean CFU (+/- 1 SD)

bioRxiv preprint doi: <https://doi.org/10.1101/2020.08.27.269704>; this version posted August 27, 2020. The copyright holder for this preprint (which was not certified by peer review) is the author/funder, who has granted bioRxiv a license to display the preprint in perpetuity. It is made available under aCC-BY 4.0 International license.

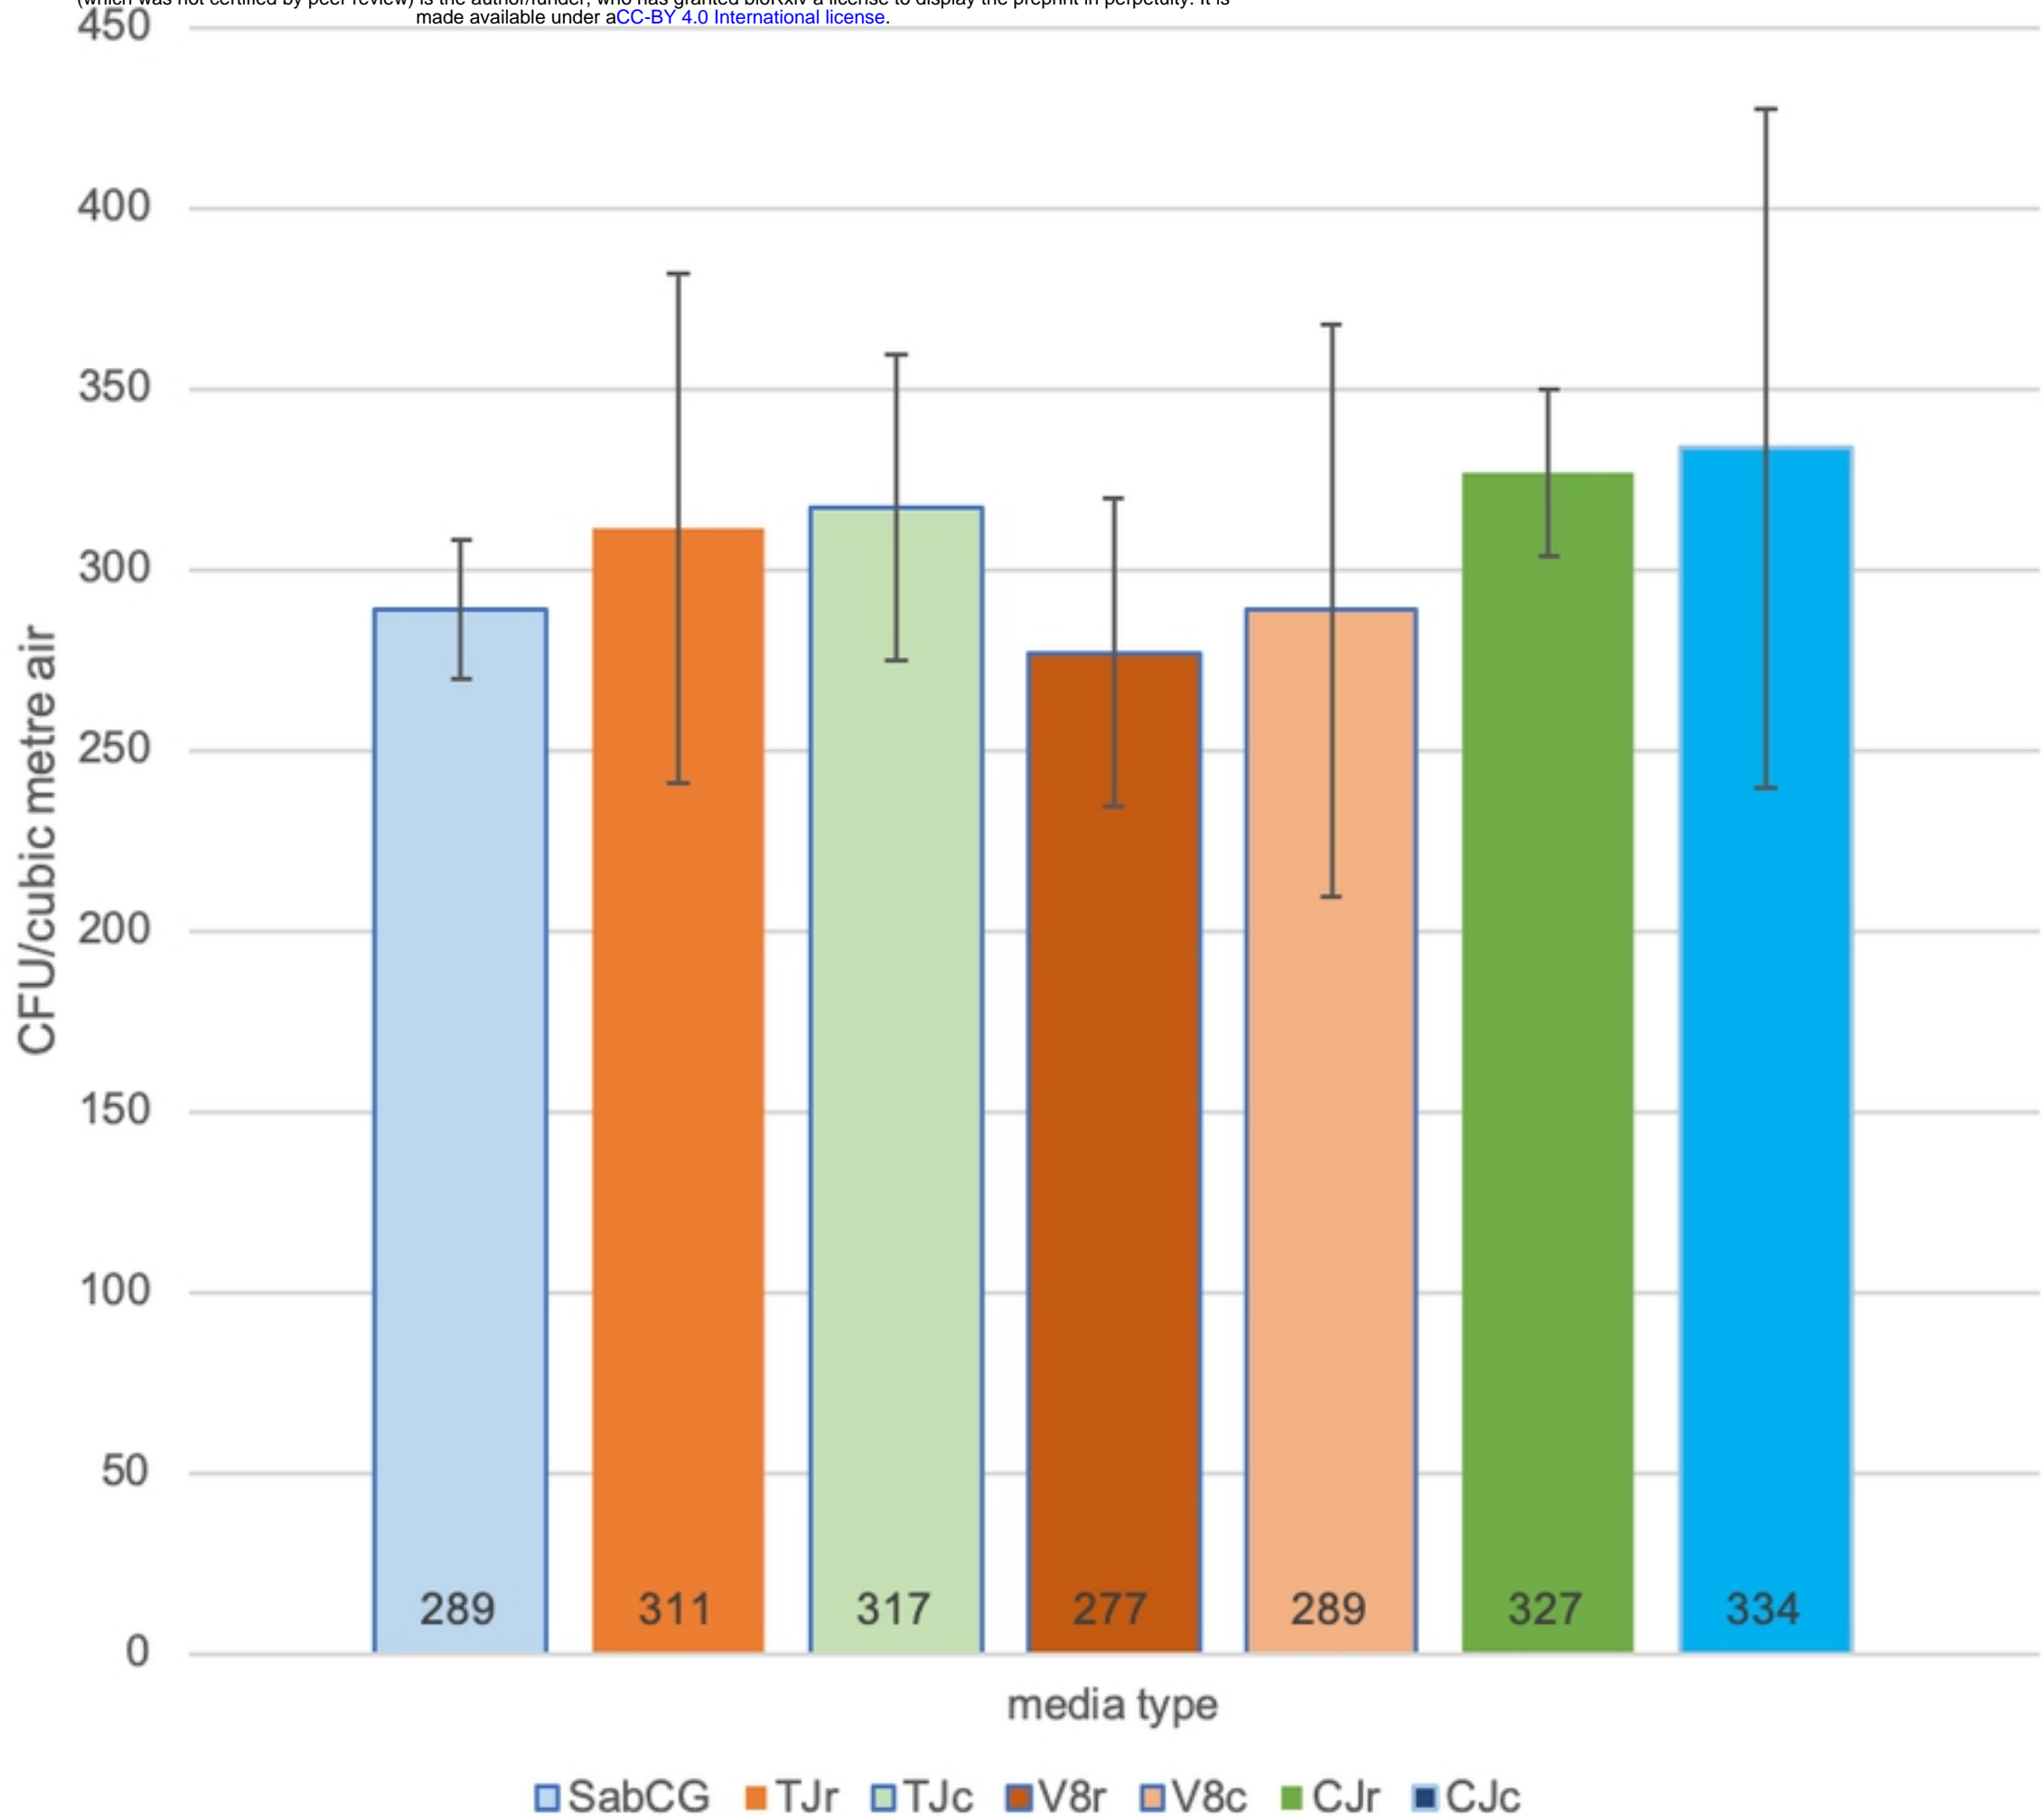

Figure 2

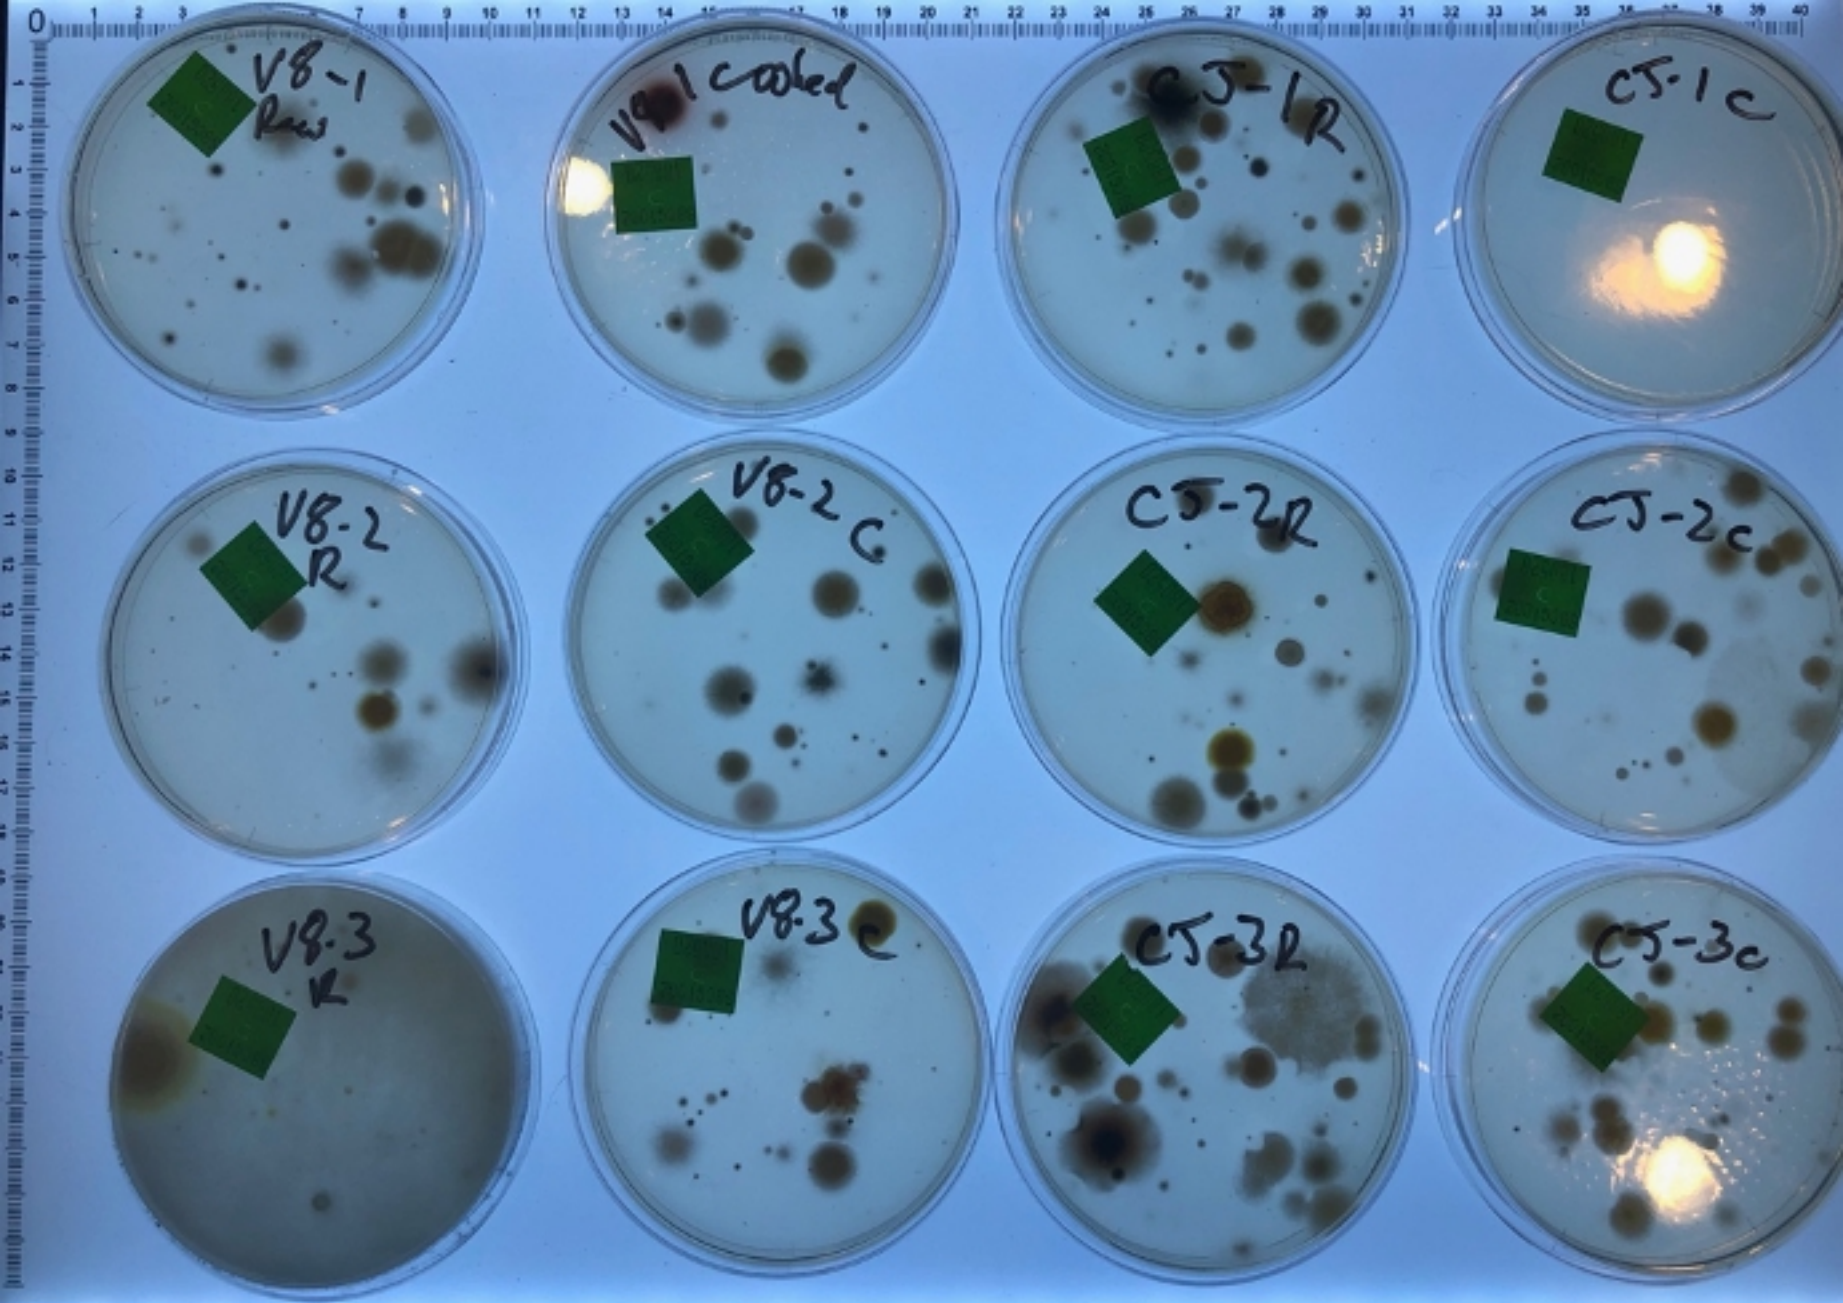

Figure 3

### Airborne fungal CFU ( $\pm 1$ SD)

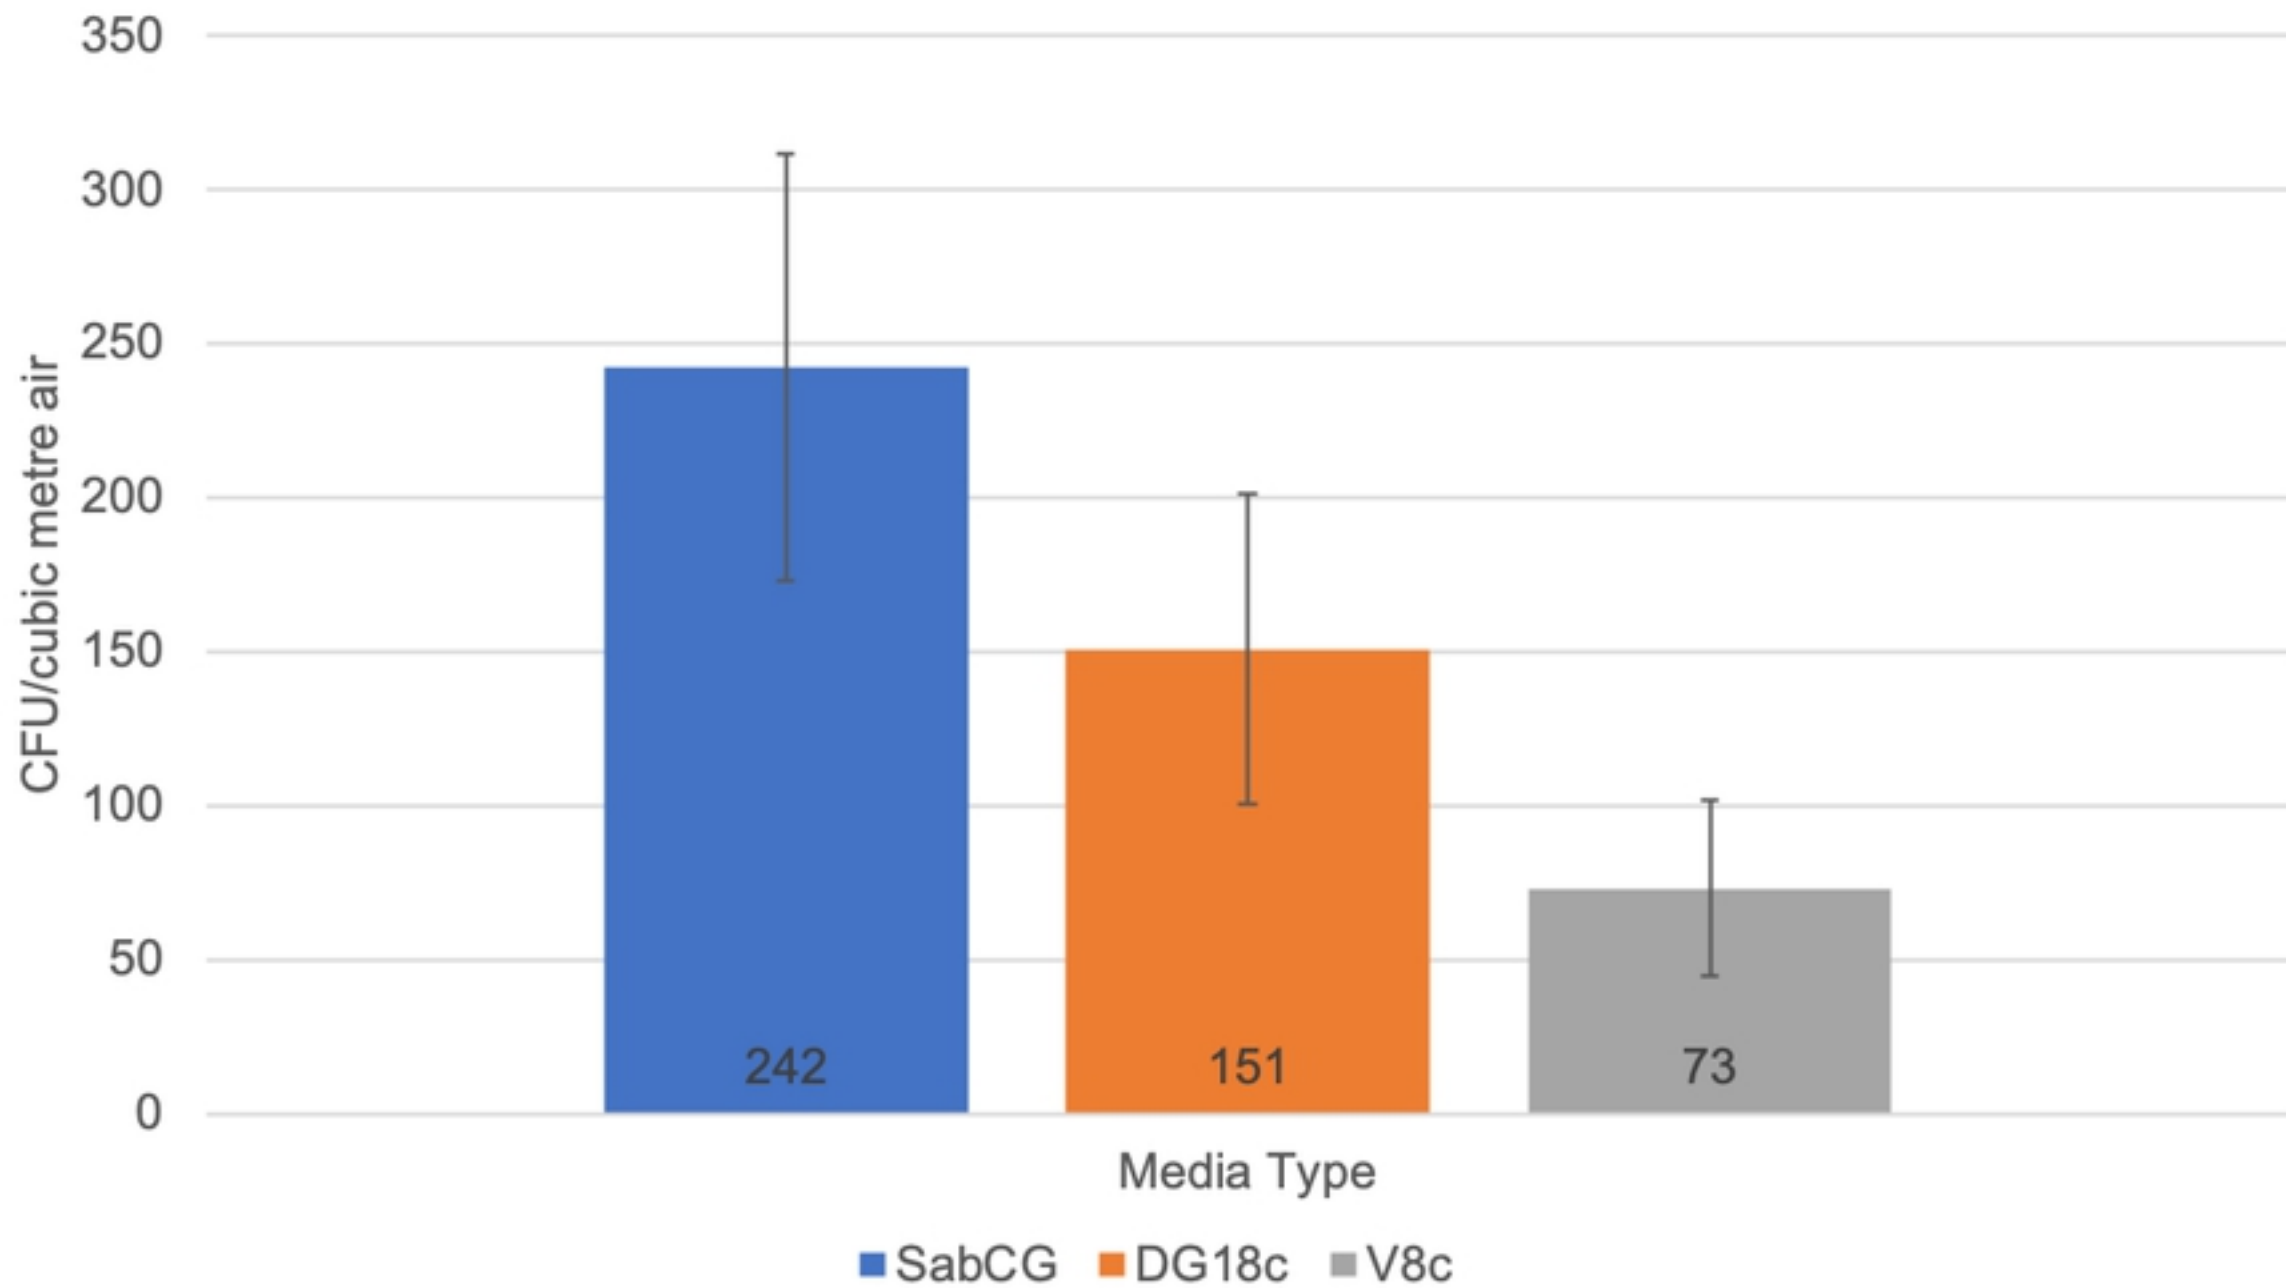

Figure 4

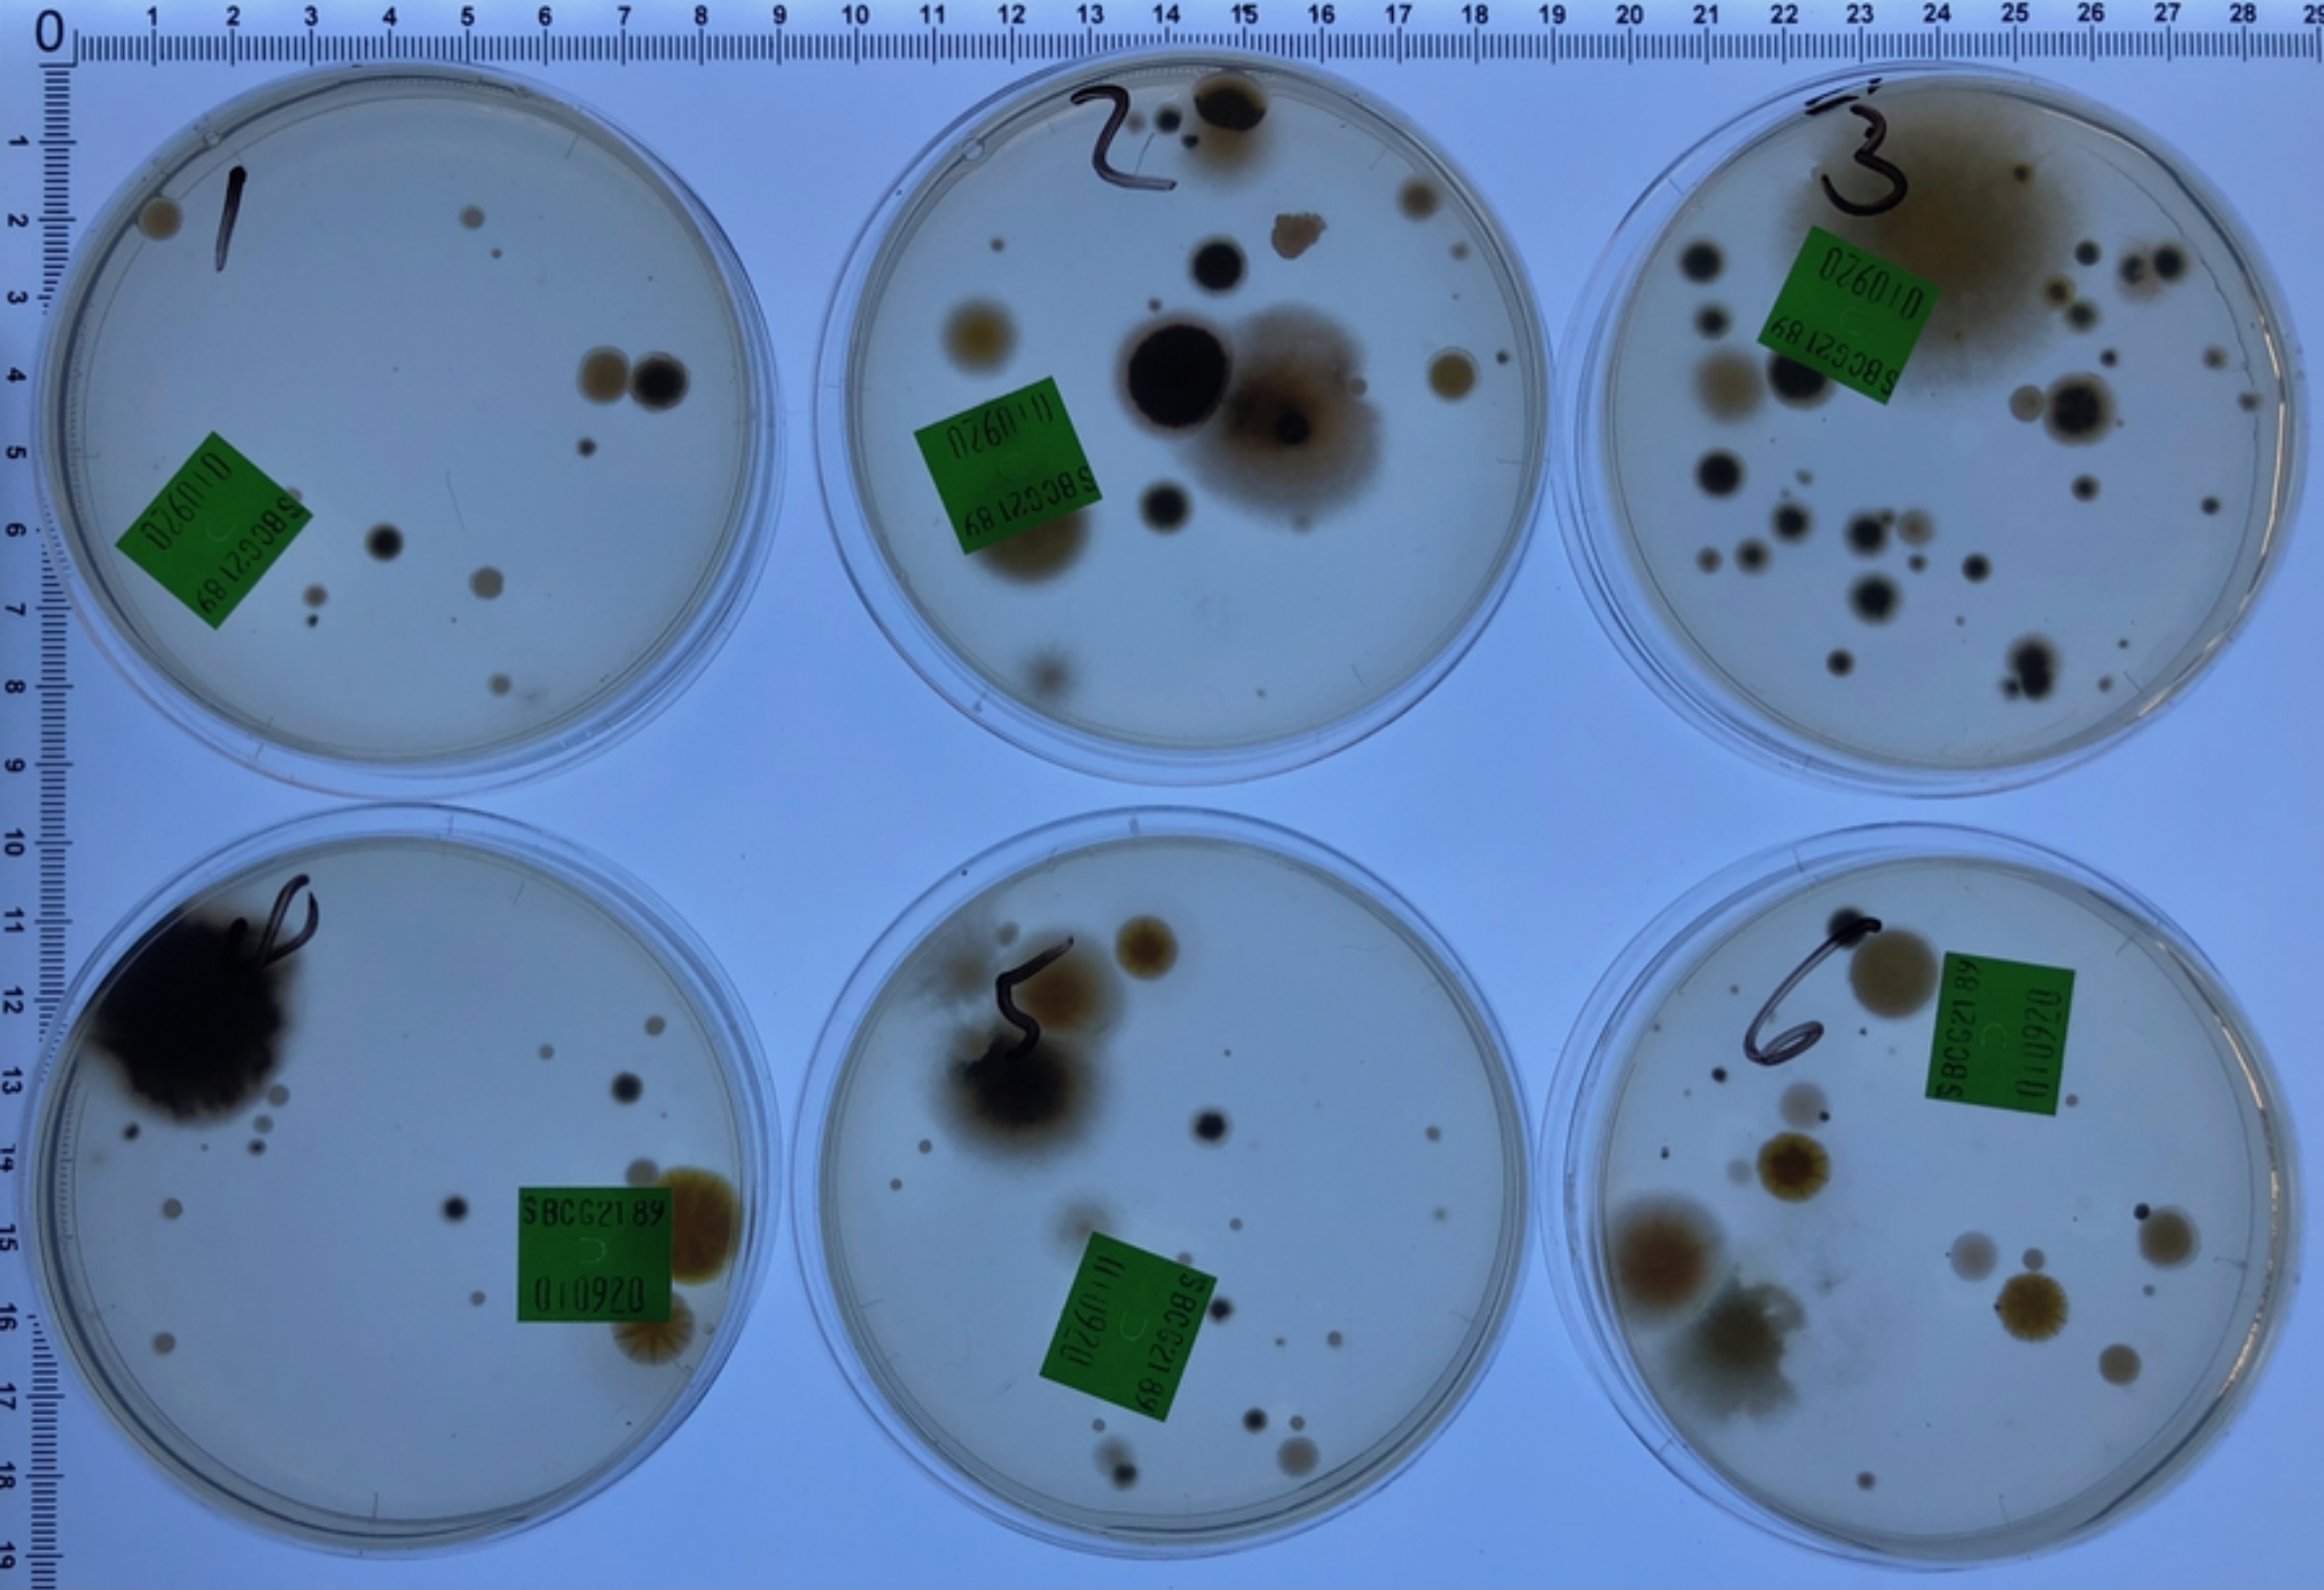

Figure 5a

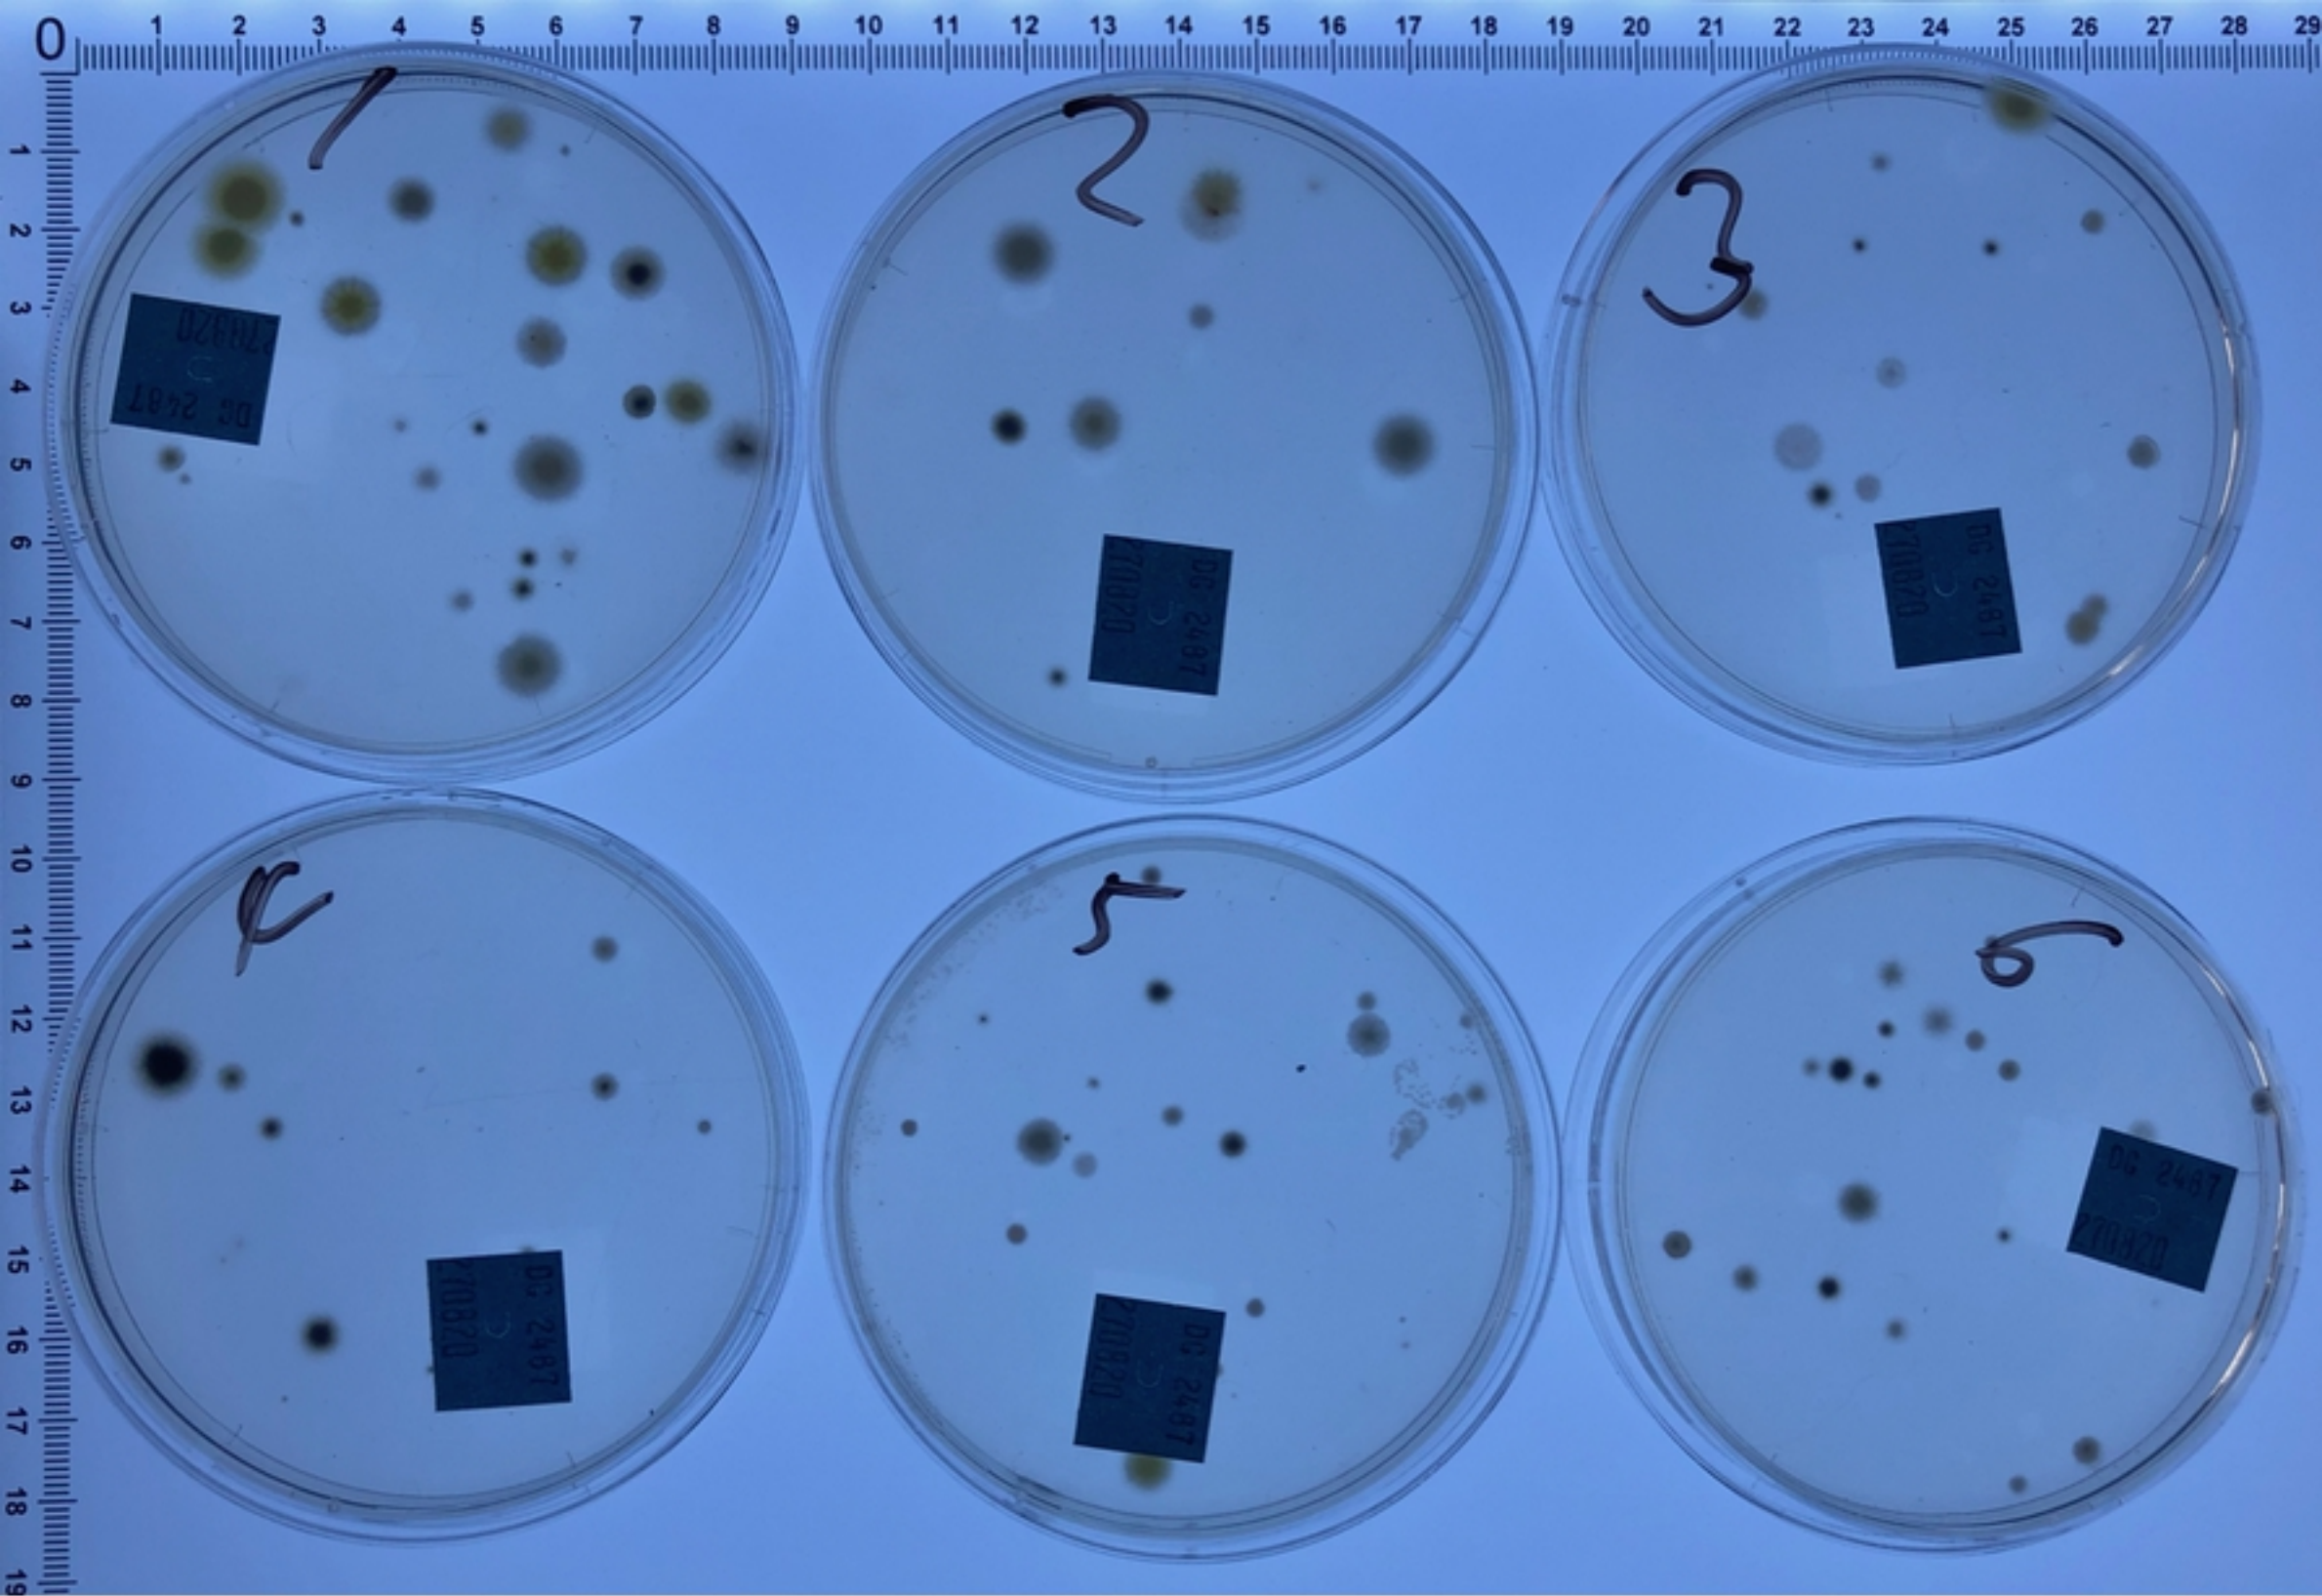

Figure 5b

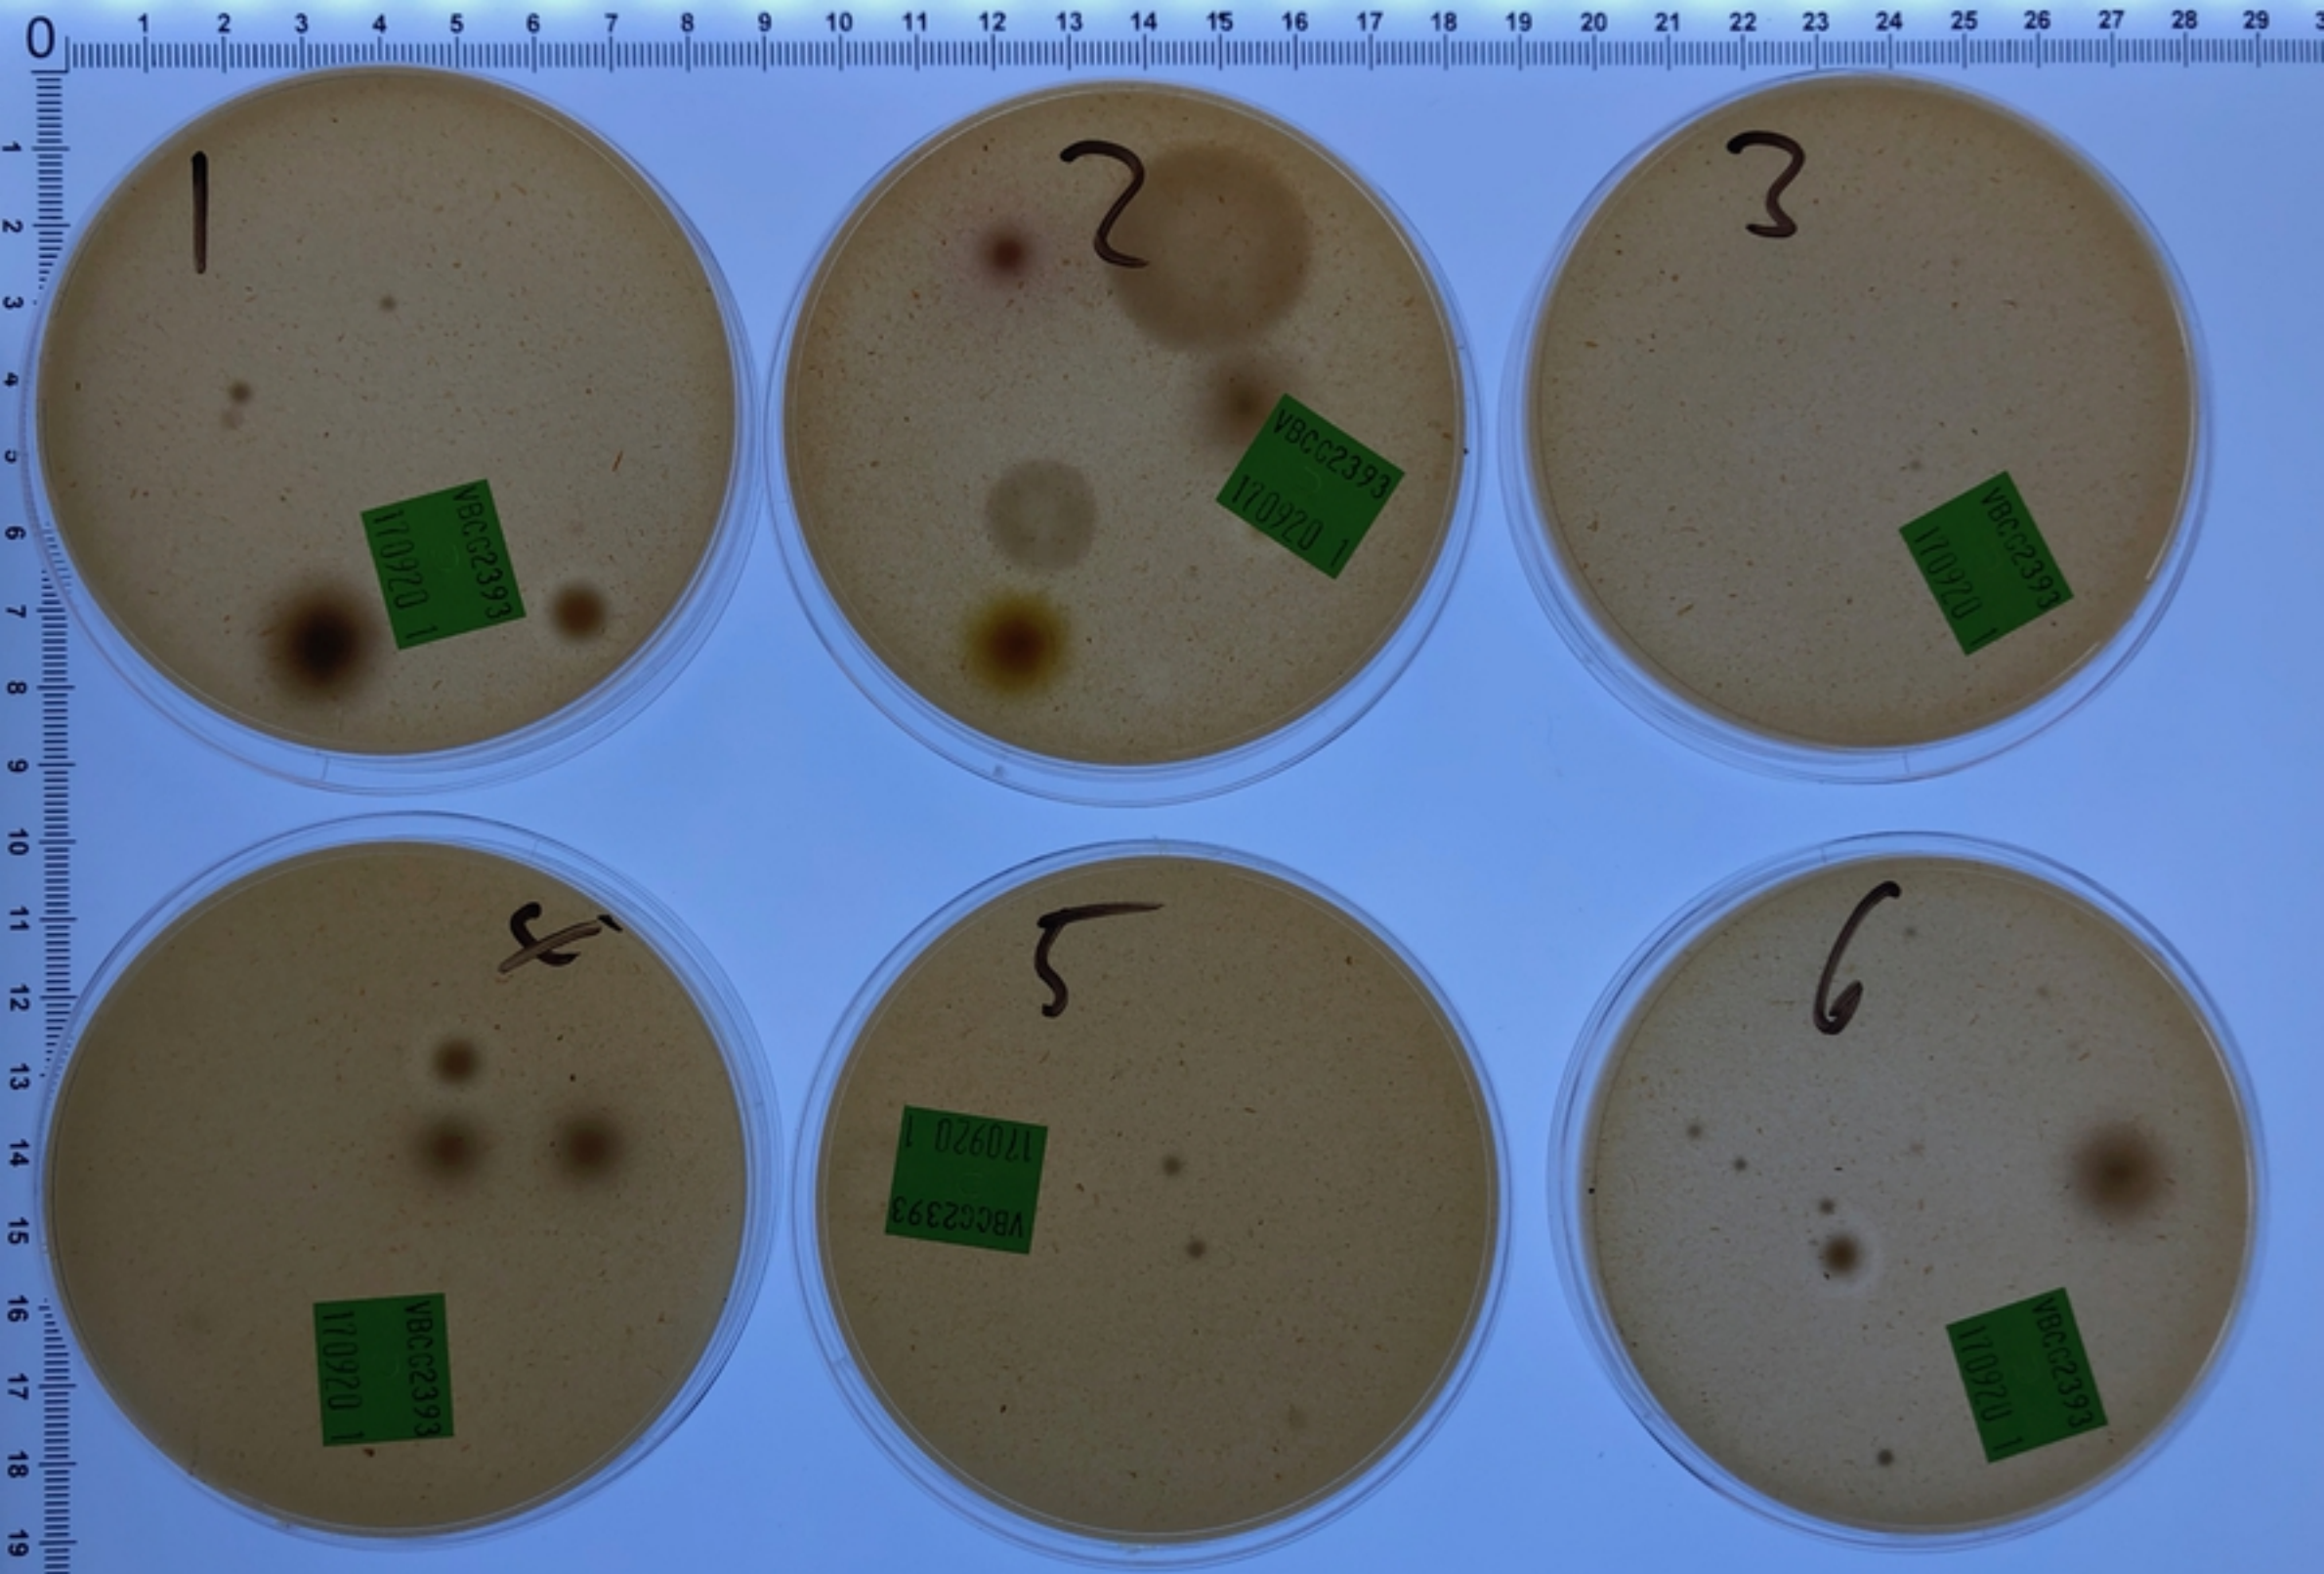

Figure 5c

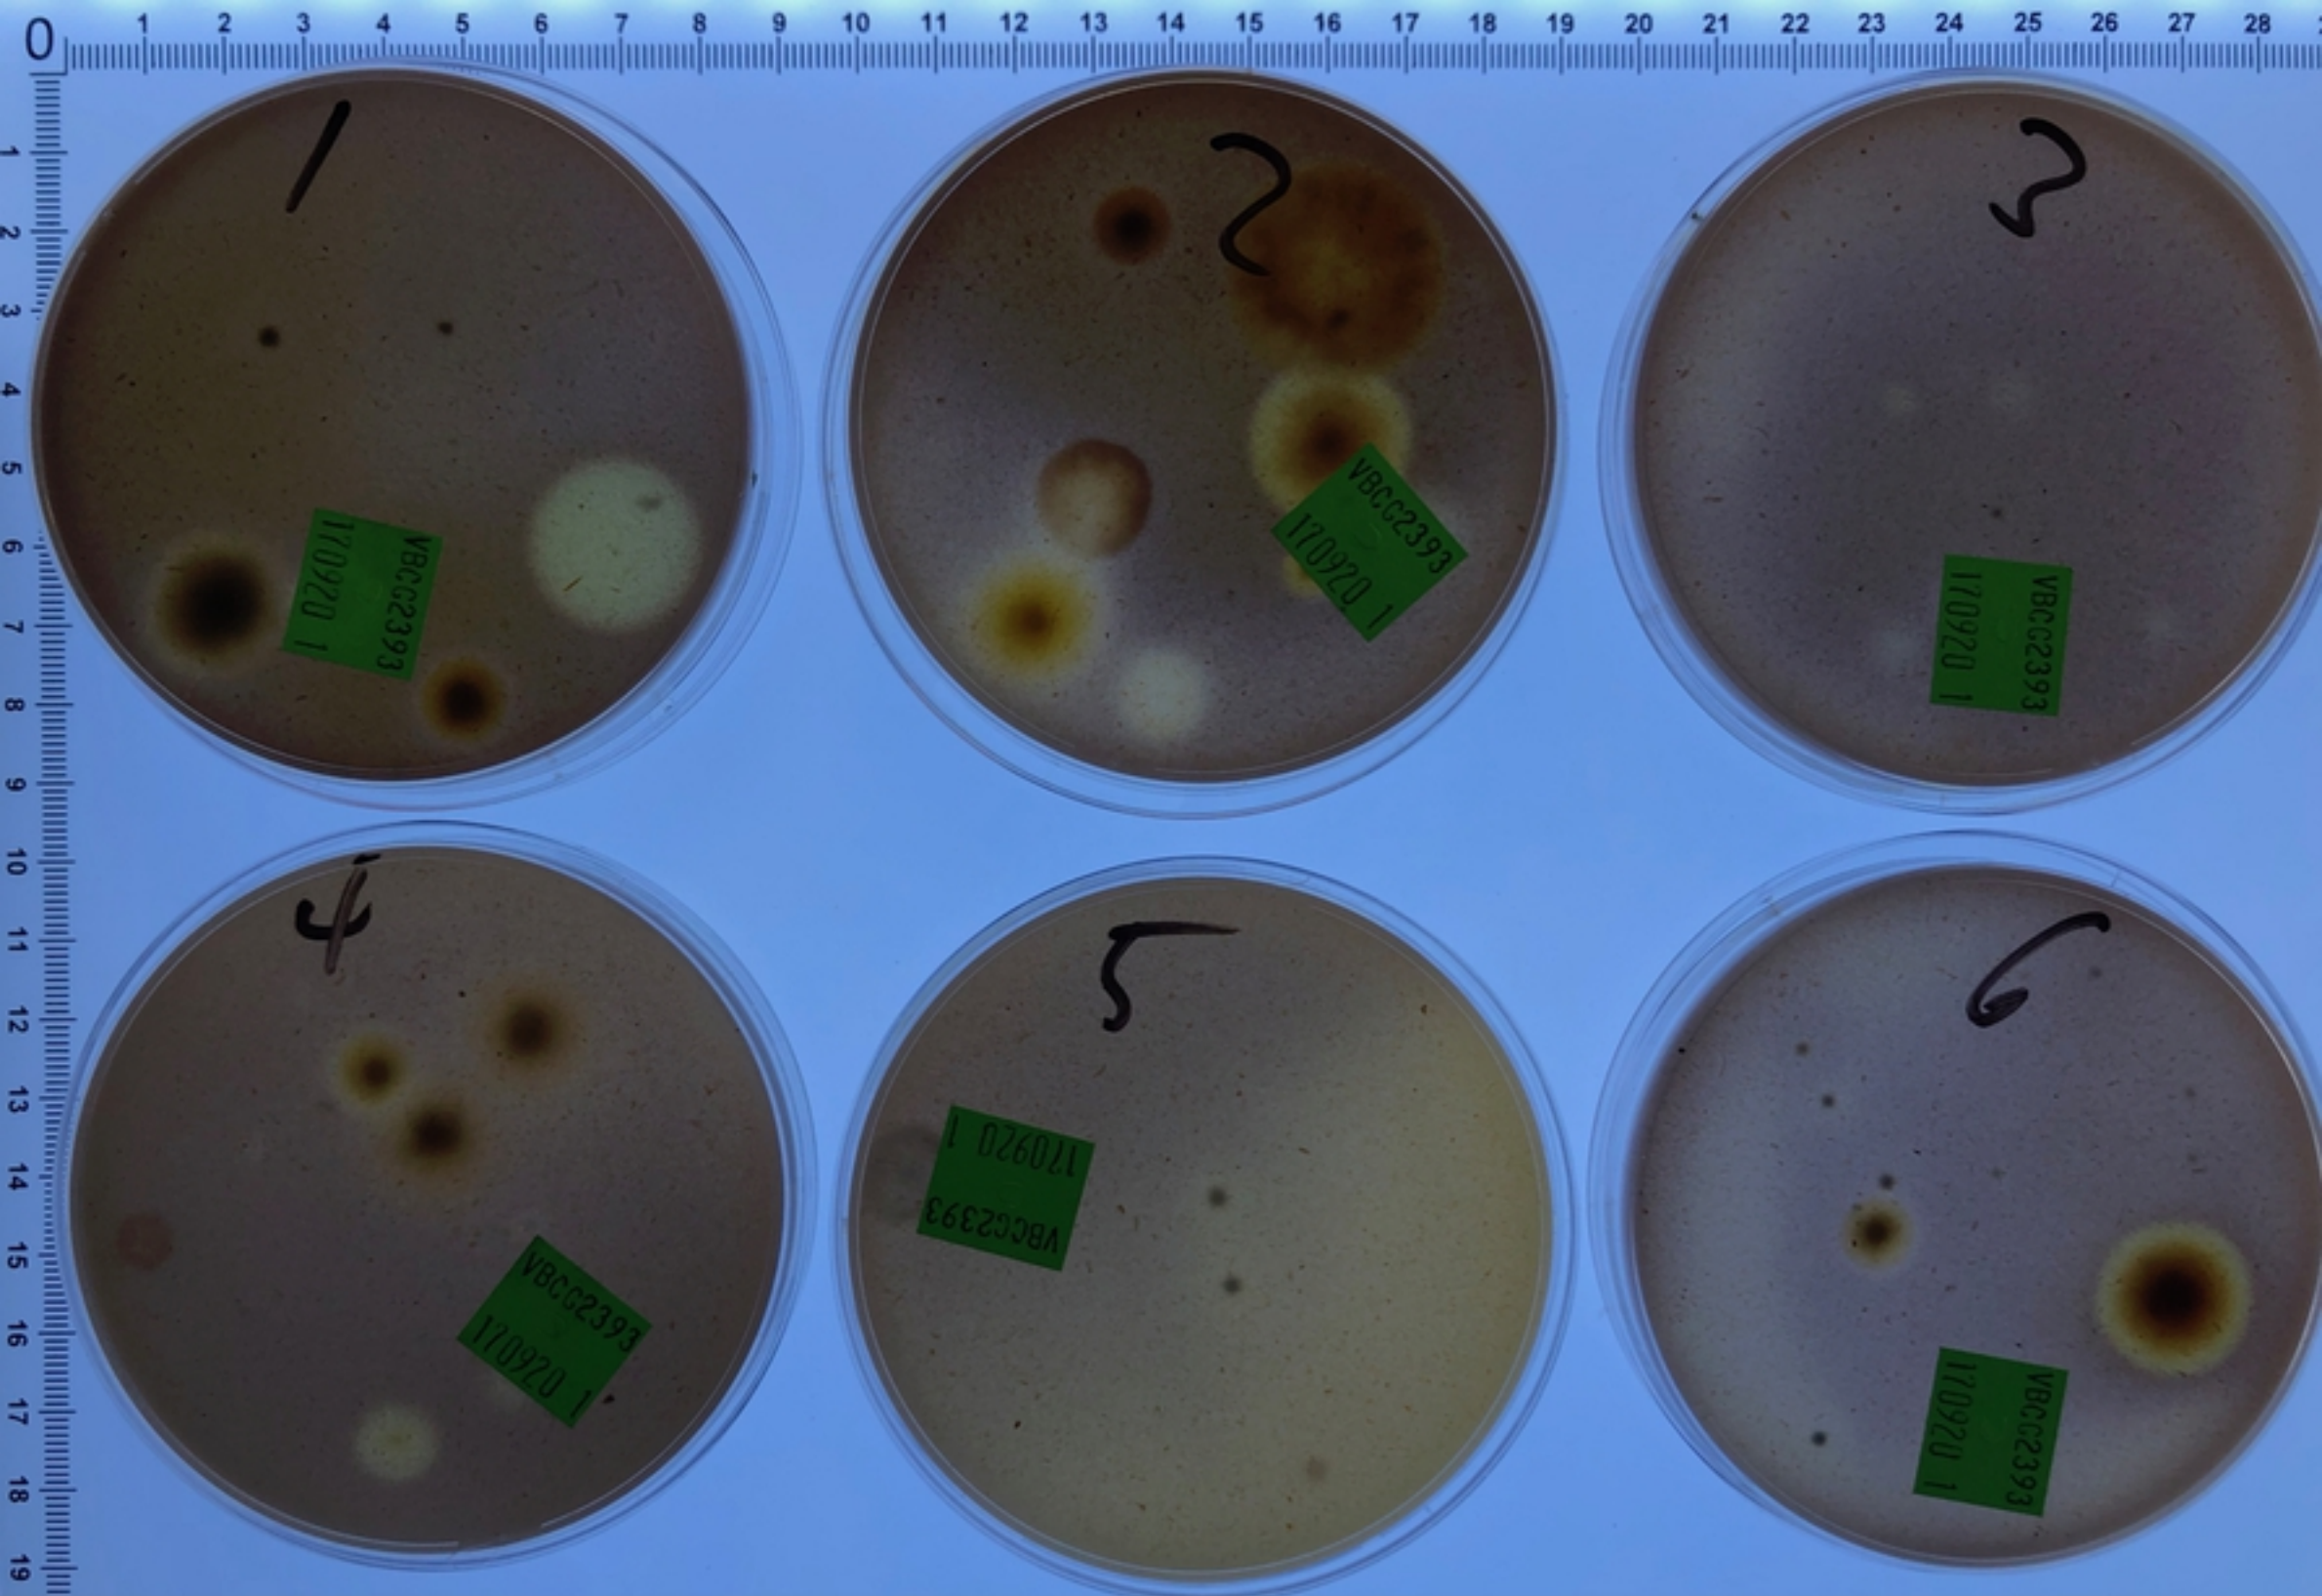

Figure 5d

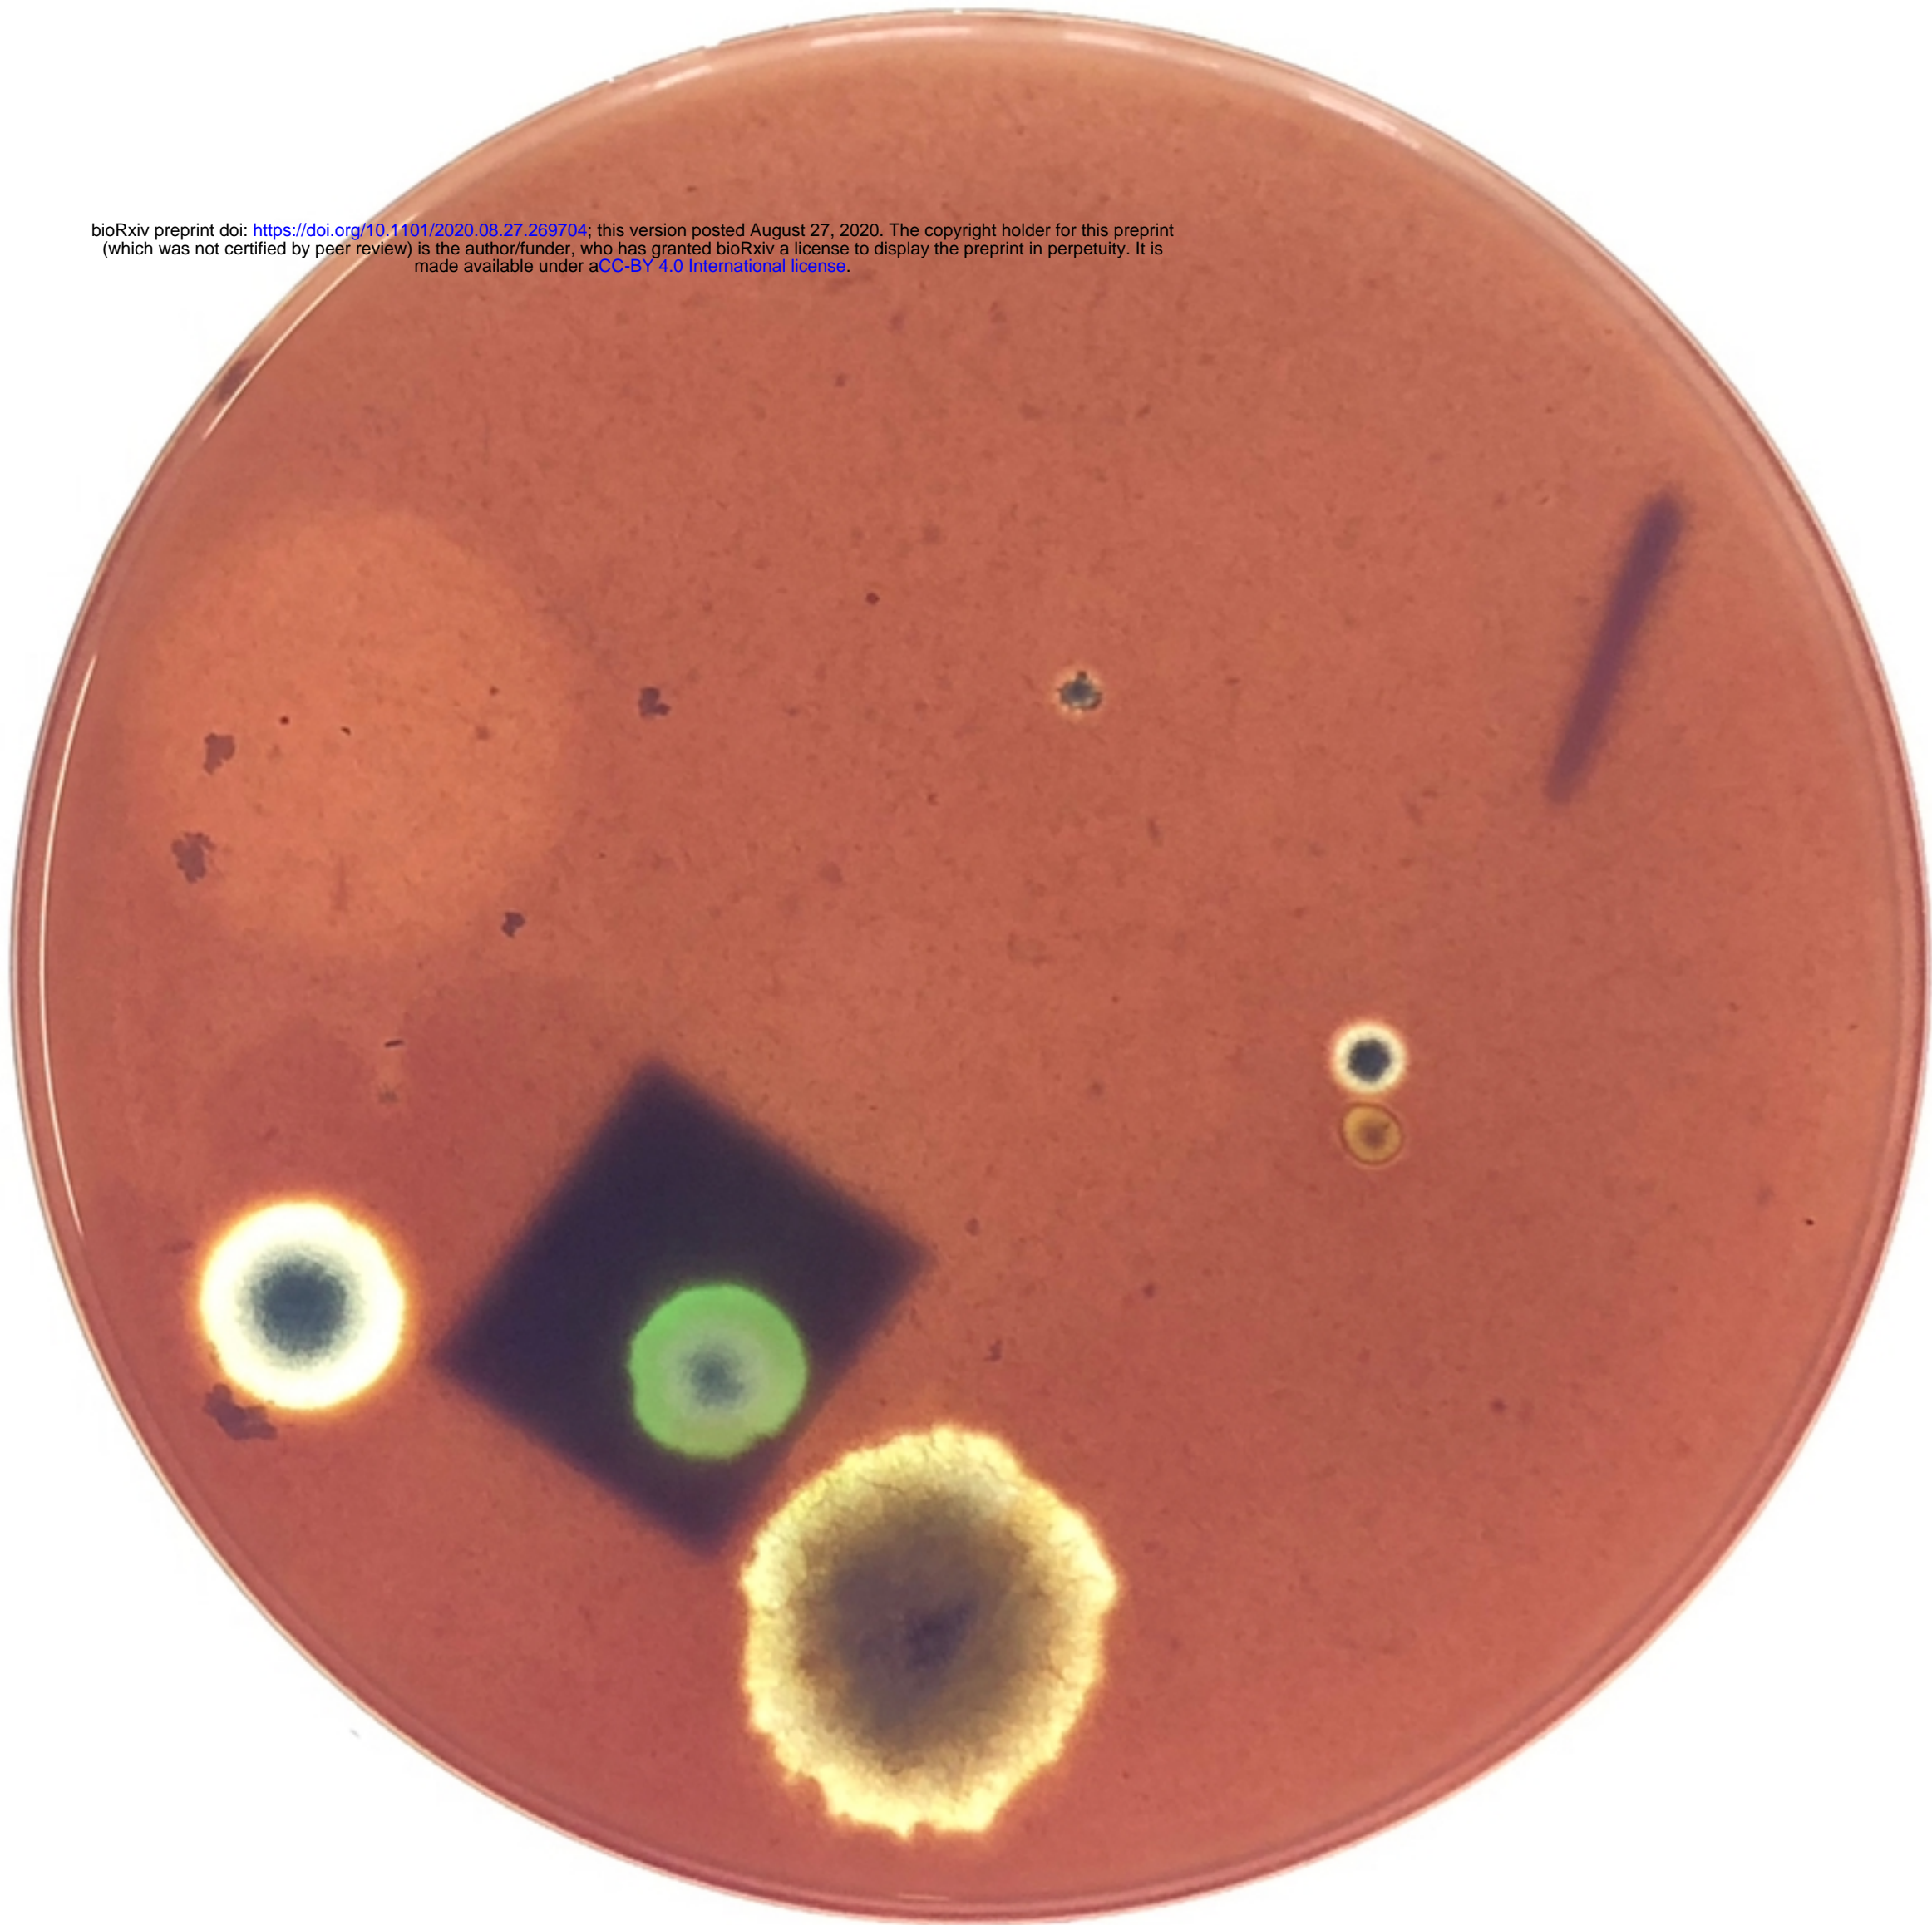

Figure 5e



# Airborne fungal CFU with/without antibiotics, seeded with bacterial powder (+/- 1 SD)

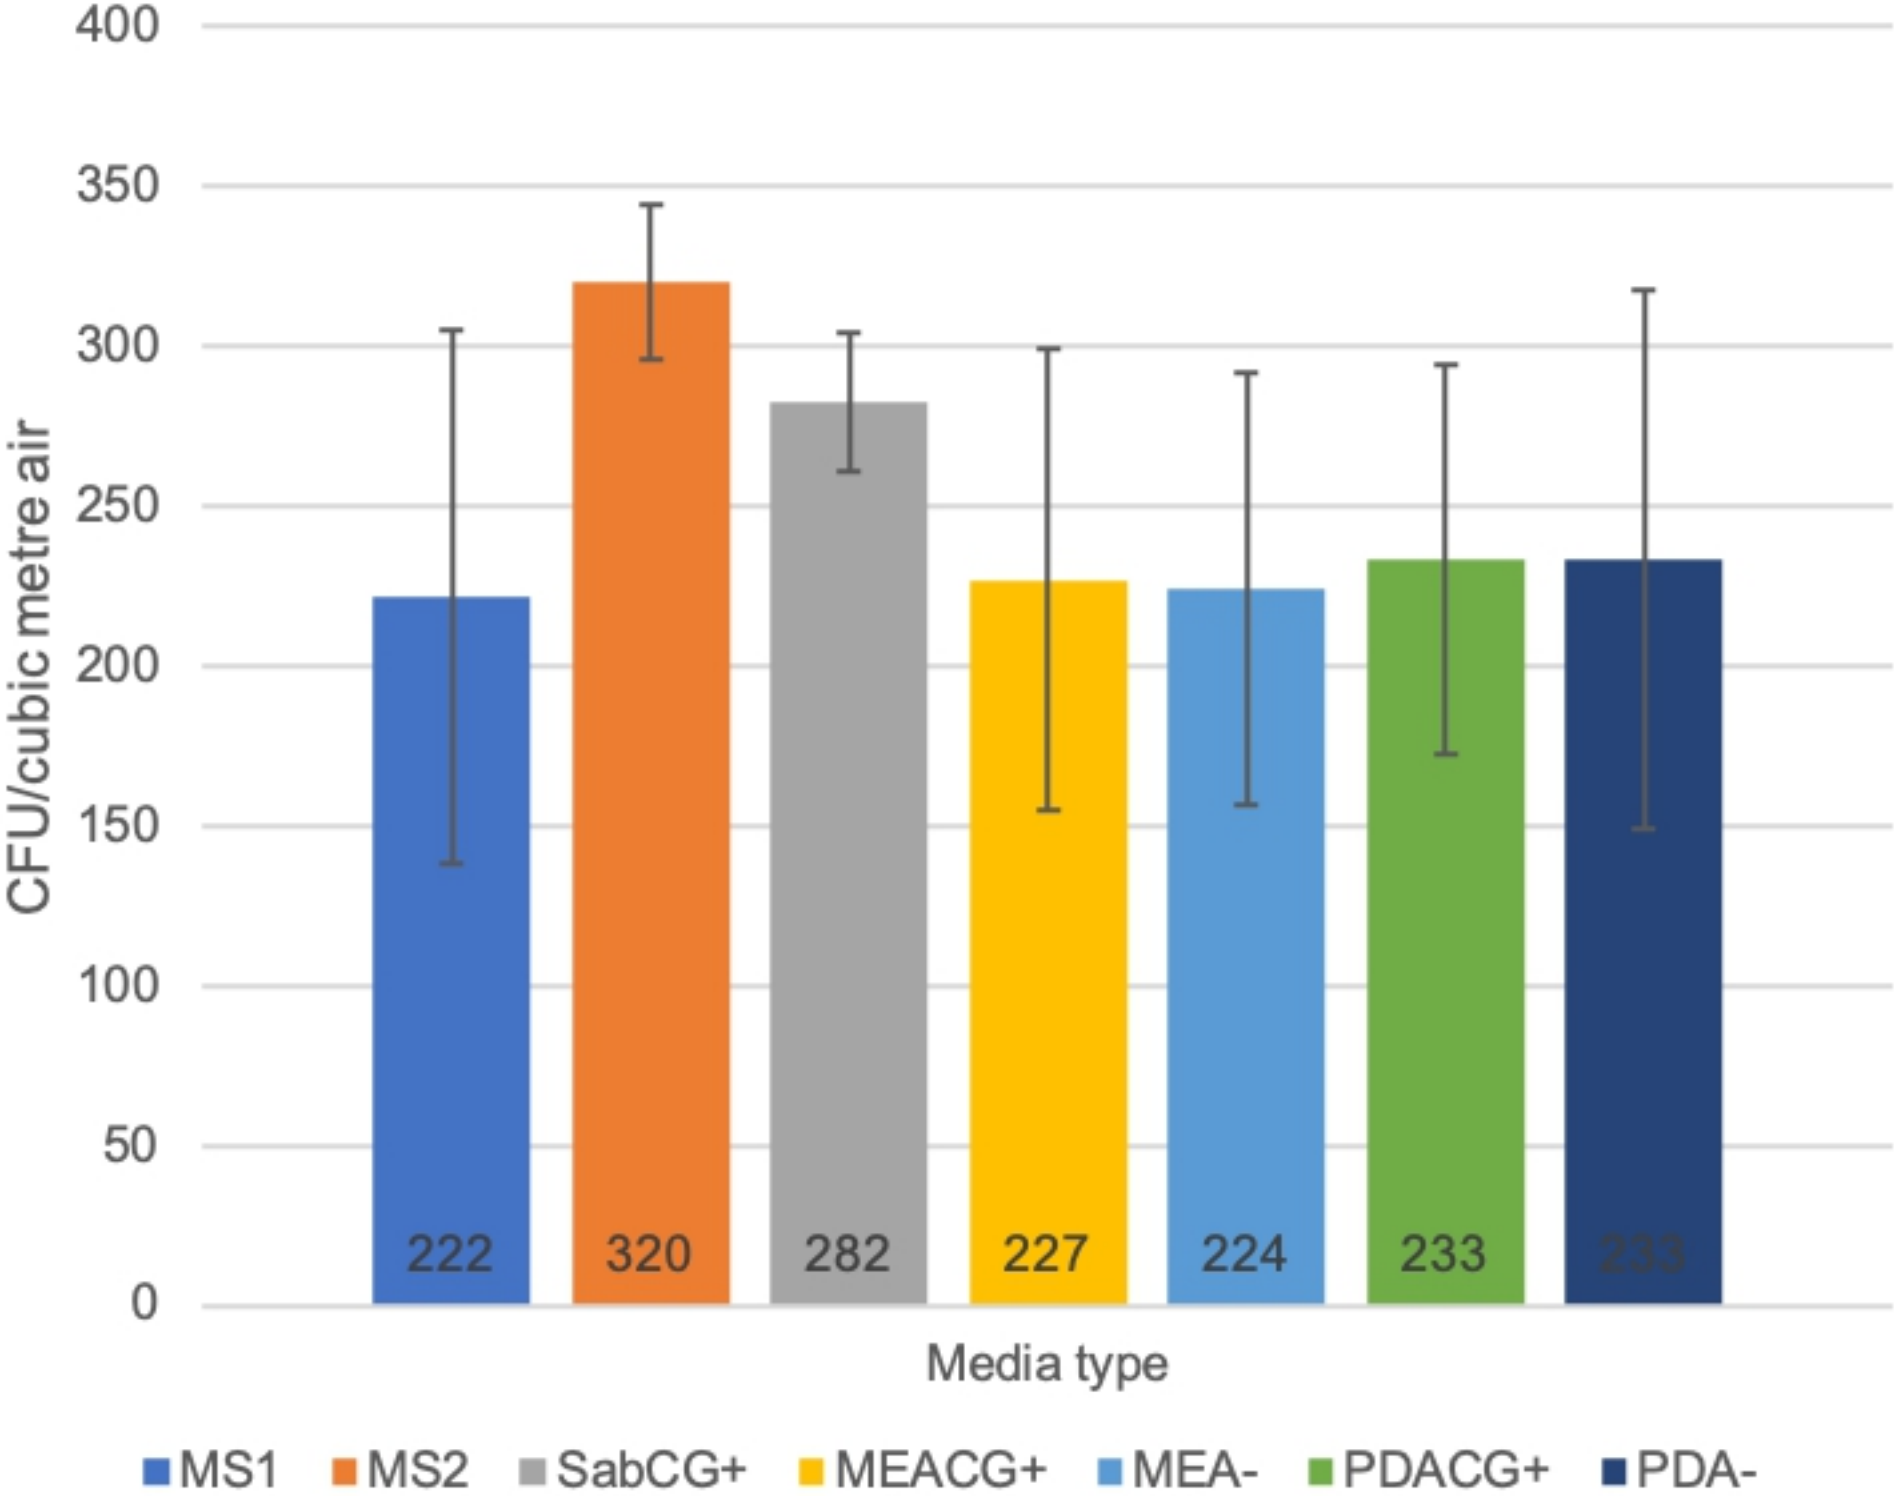

Figure 6

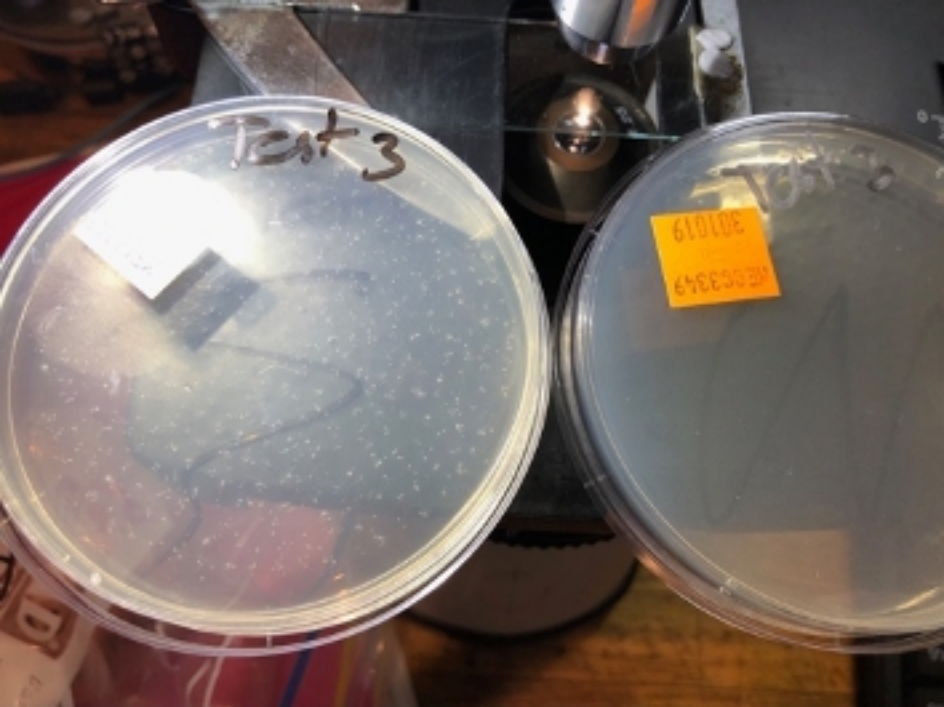

Figure 7a

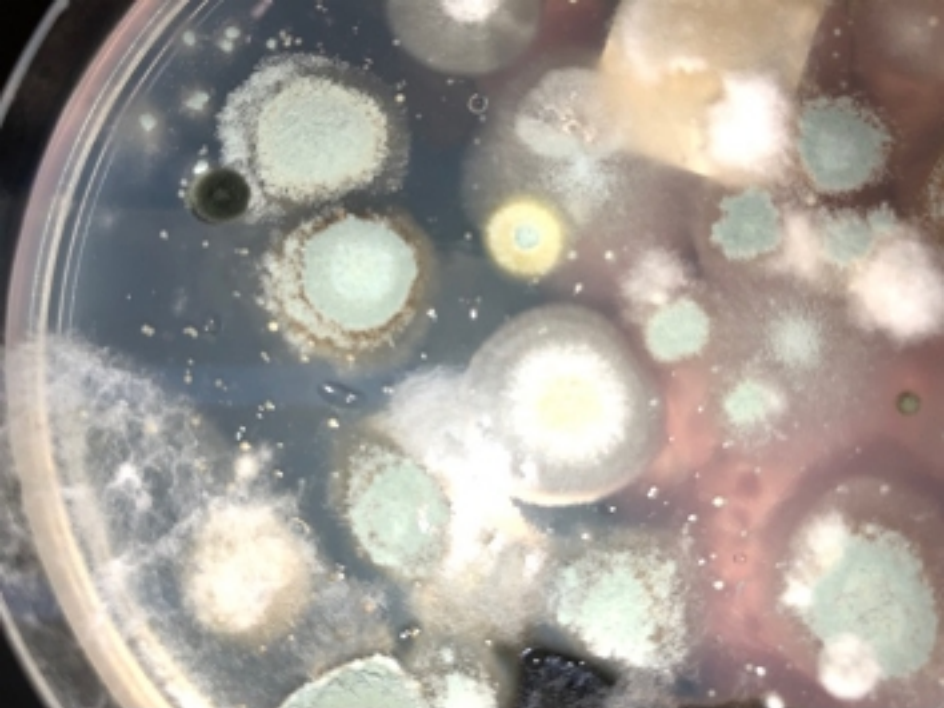

Figure 7b

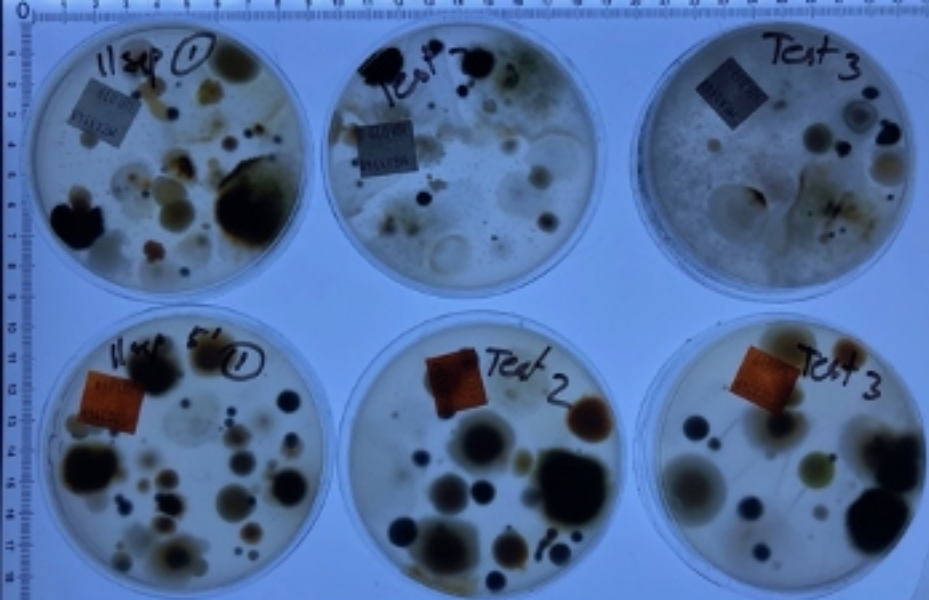

Figure 7c

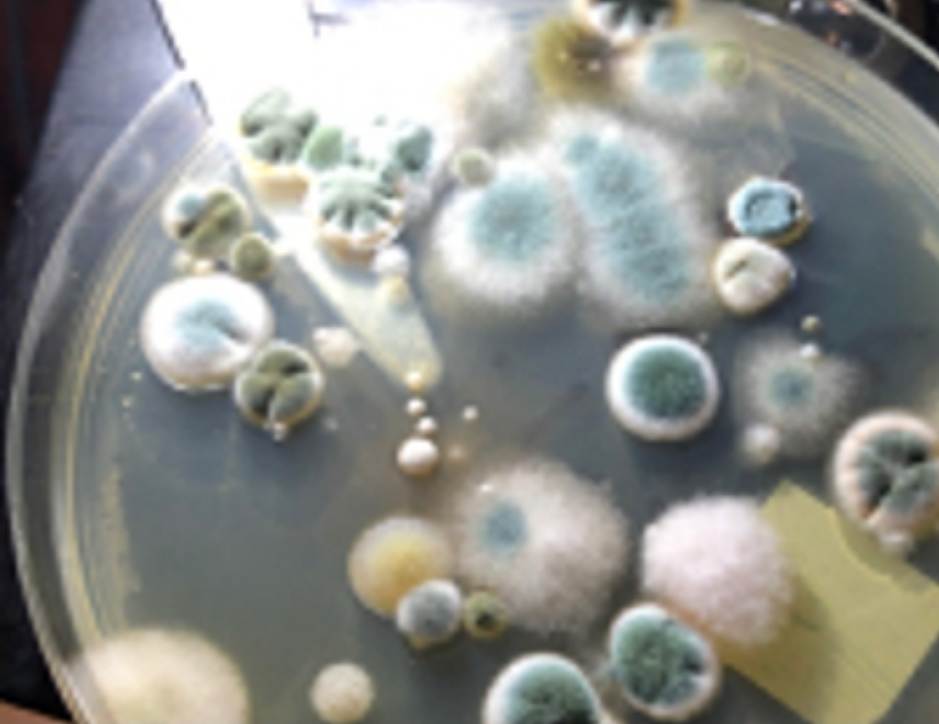

Figure 7d

0% - 8% glucose Sabouraud media, effect on airborne fungal mean  
CFU (+/- 1 SD)

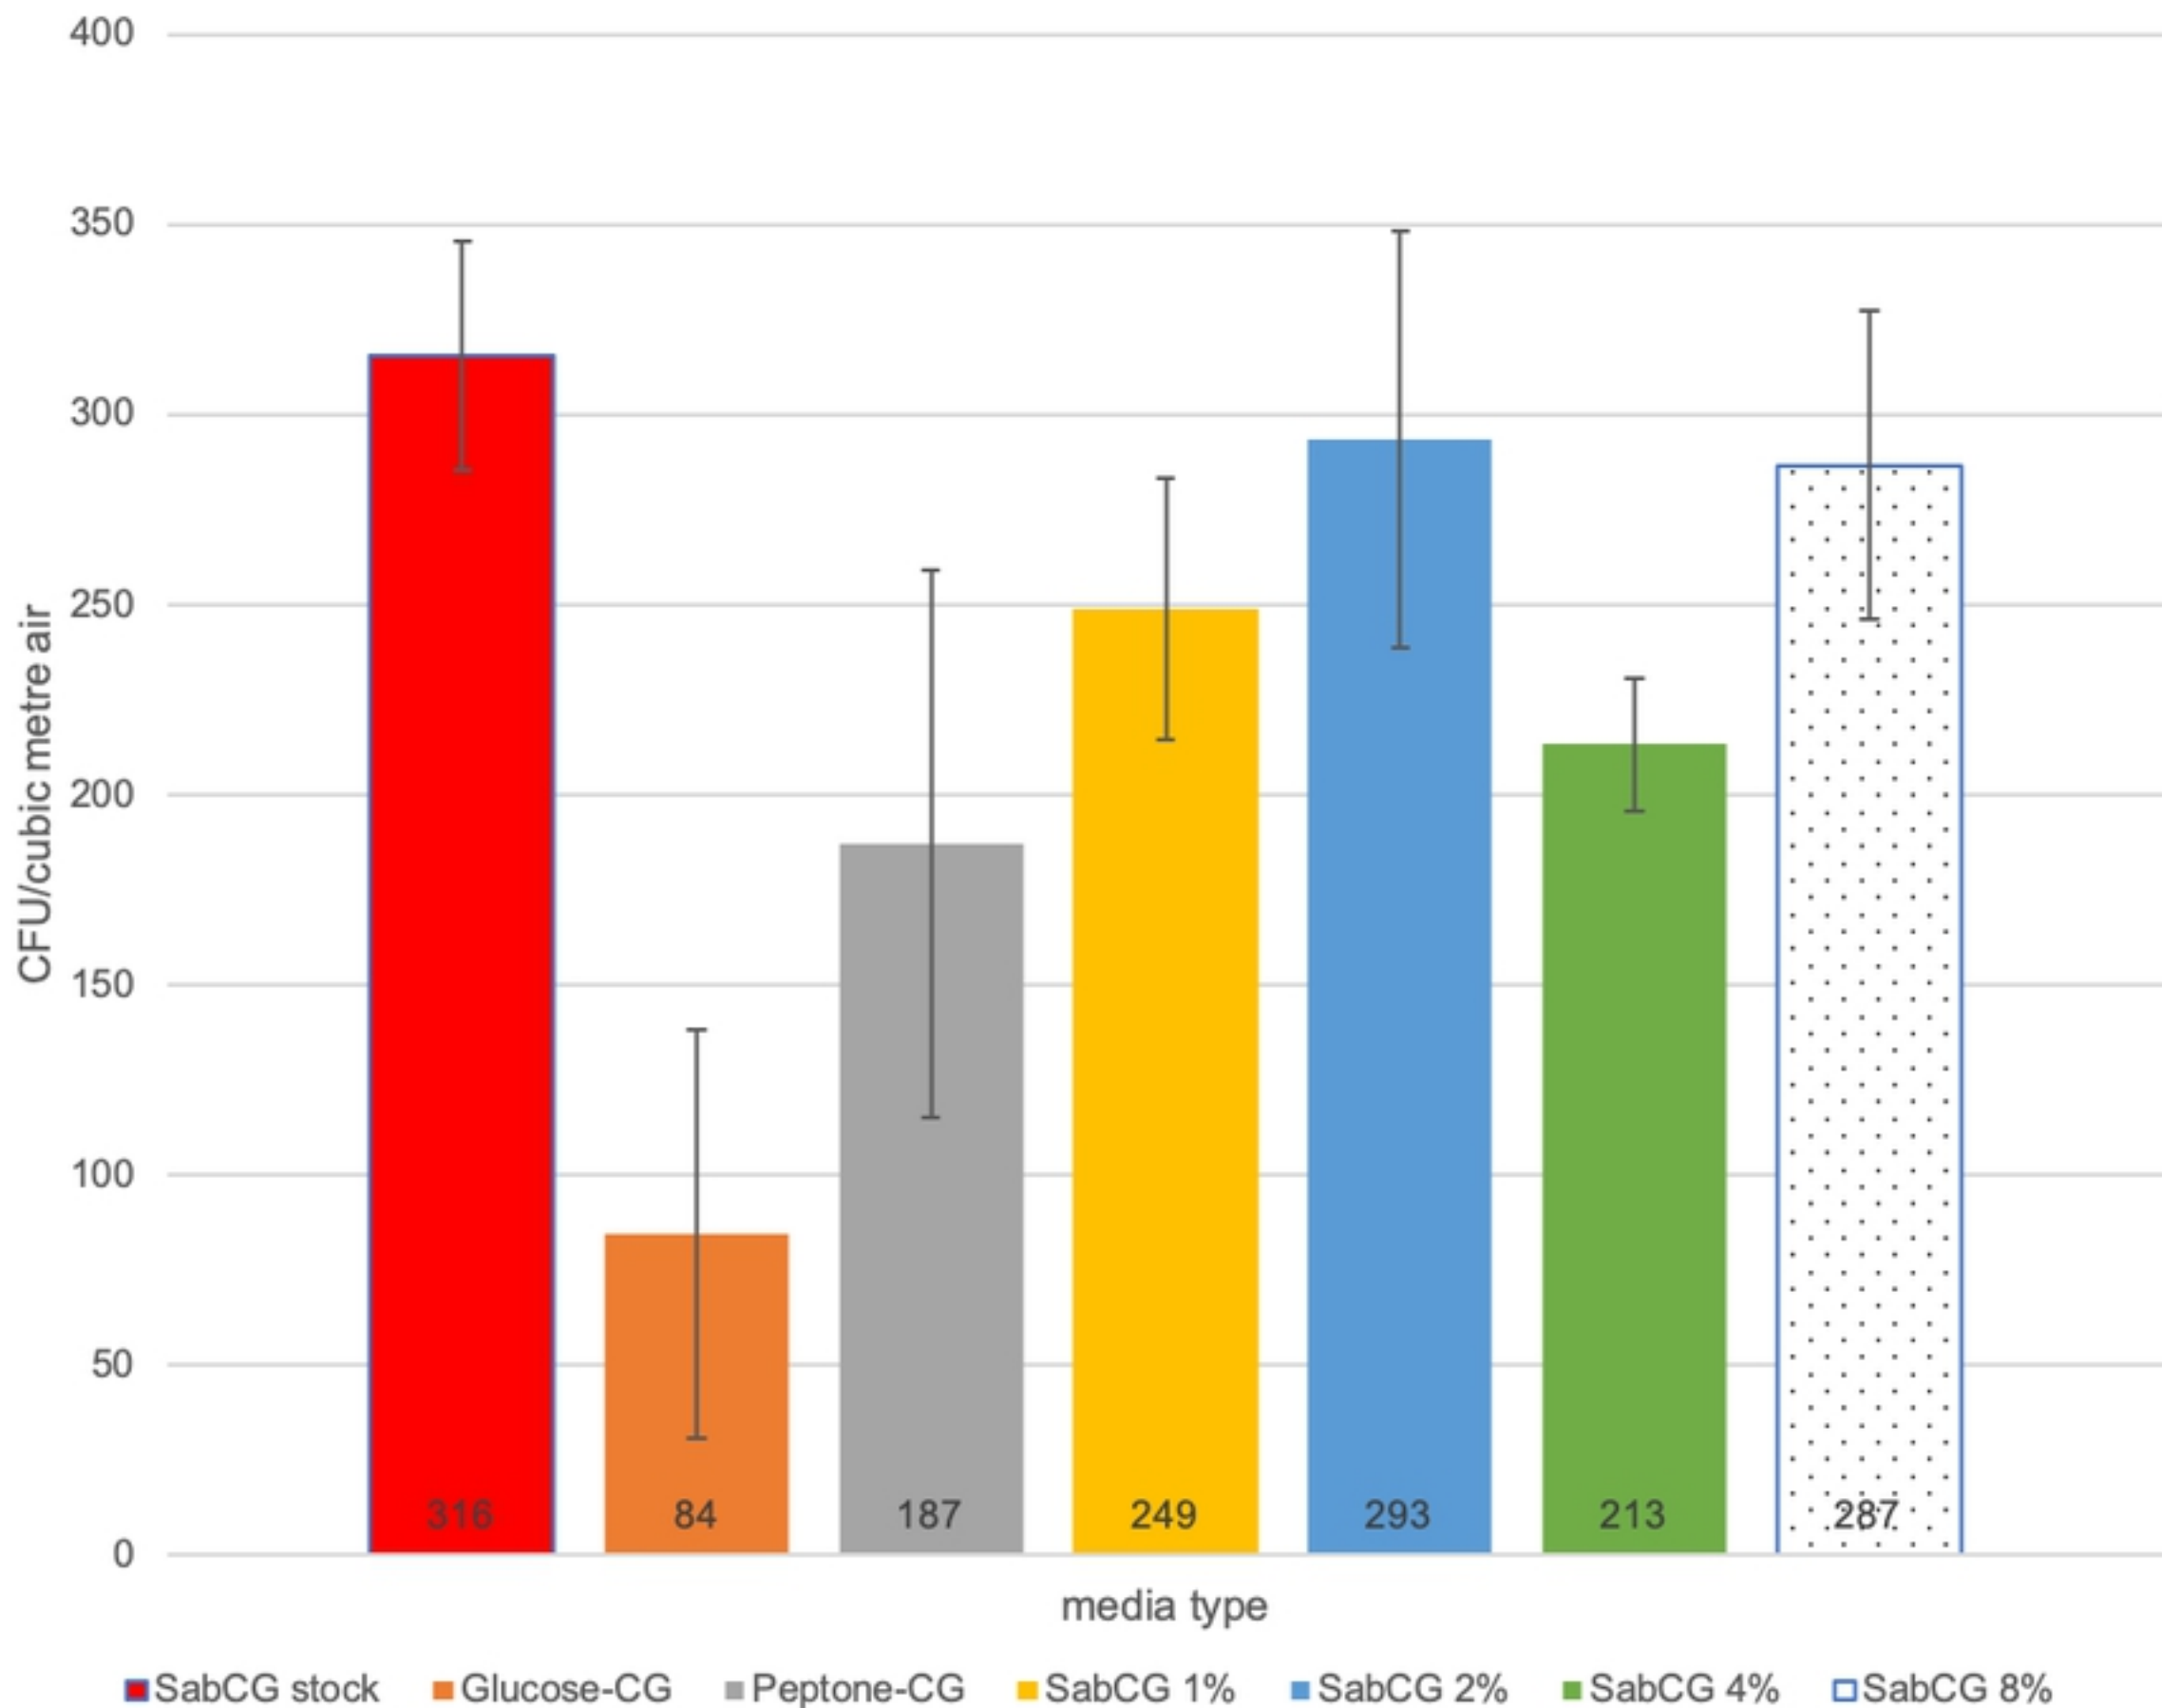

Figure 8

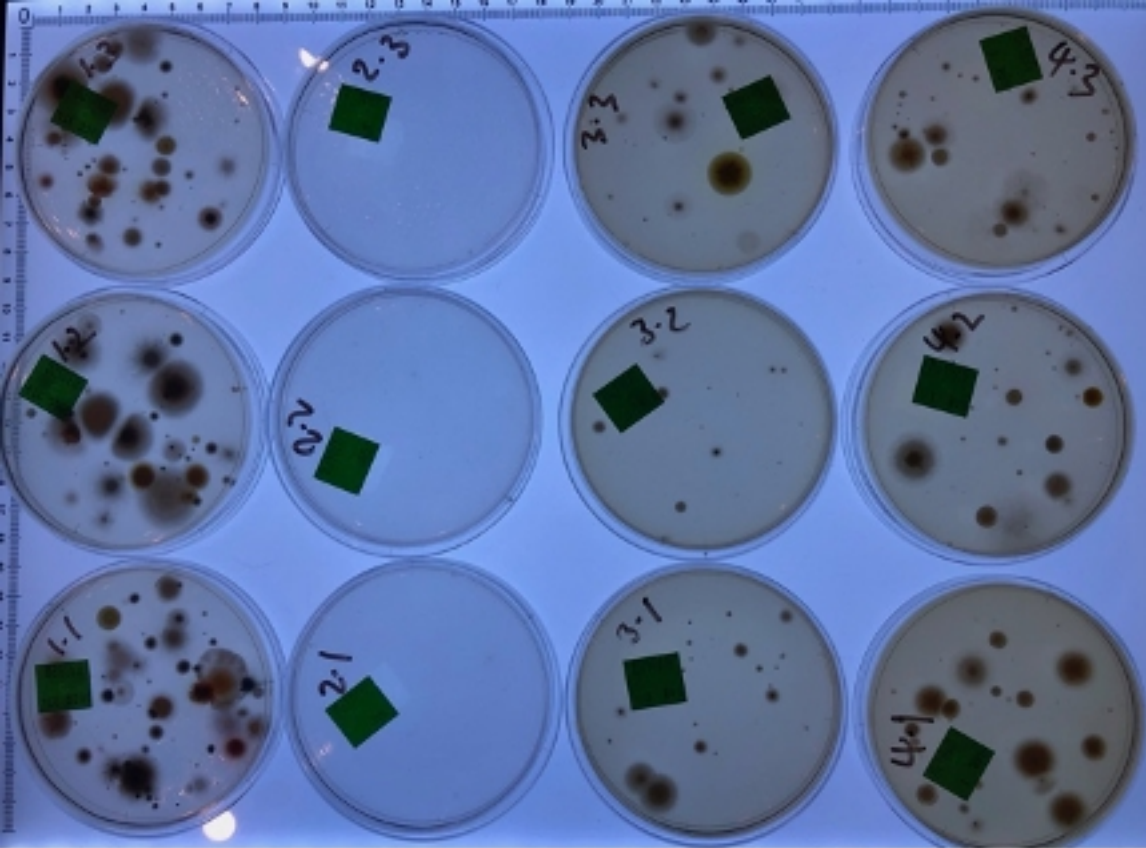

Figure 9a

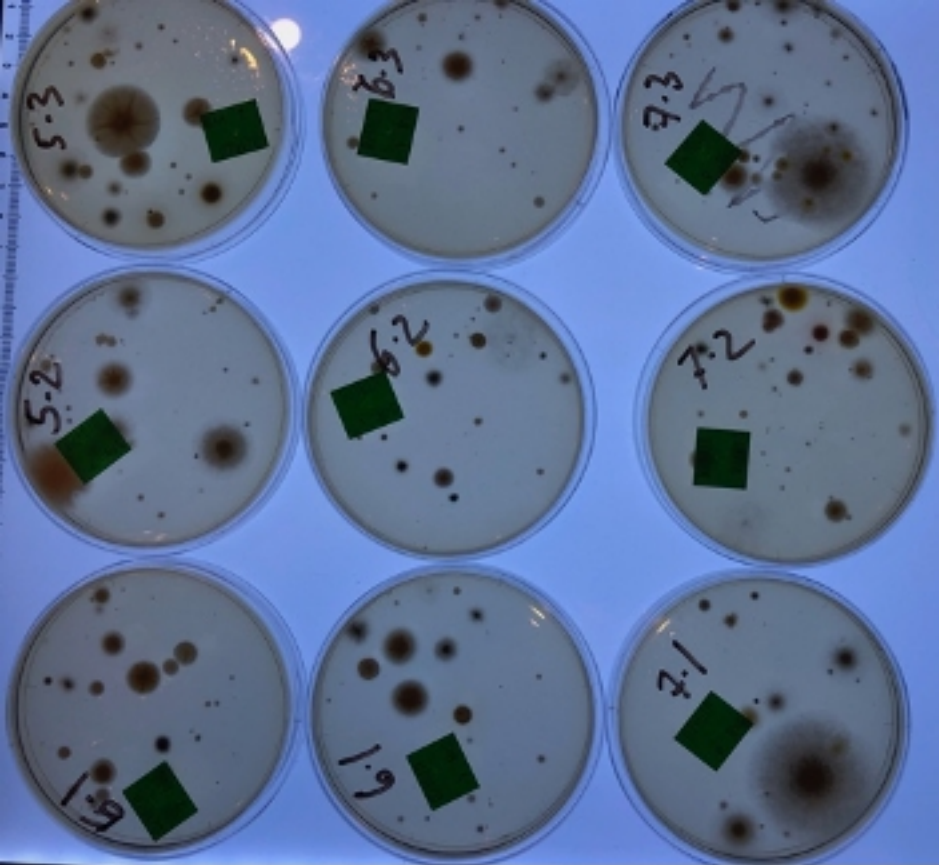

Figure 9b



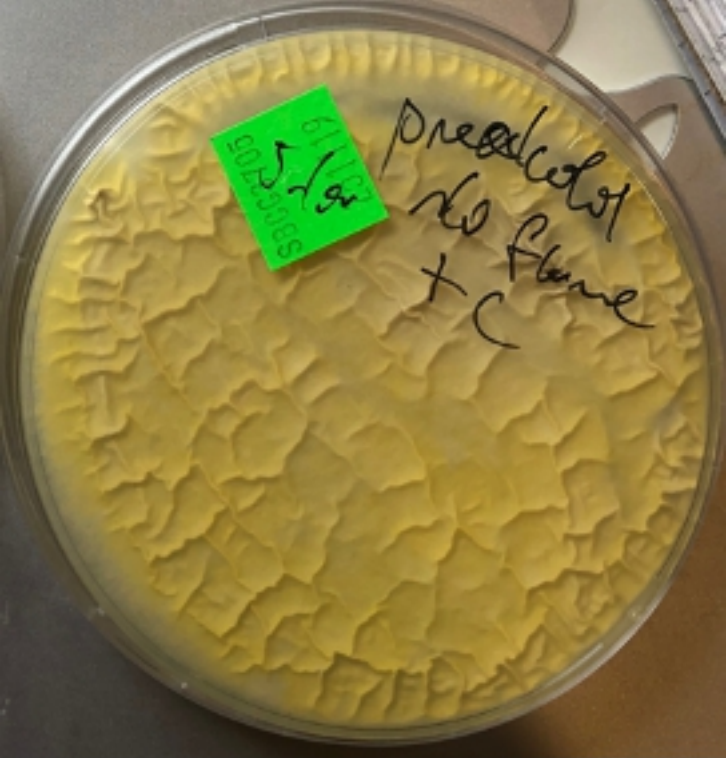

Figure 10a

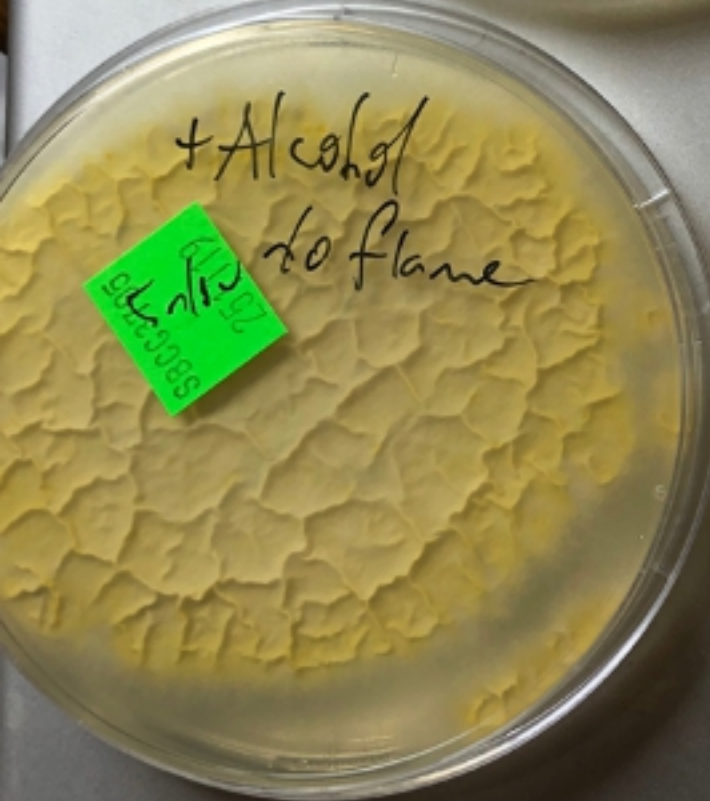

Figure 10b

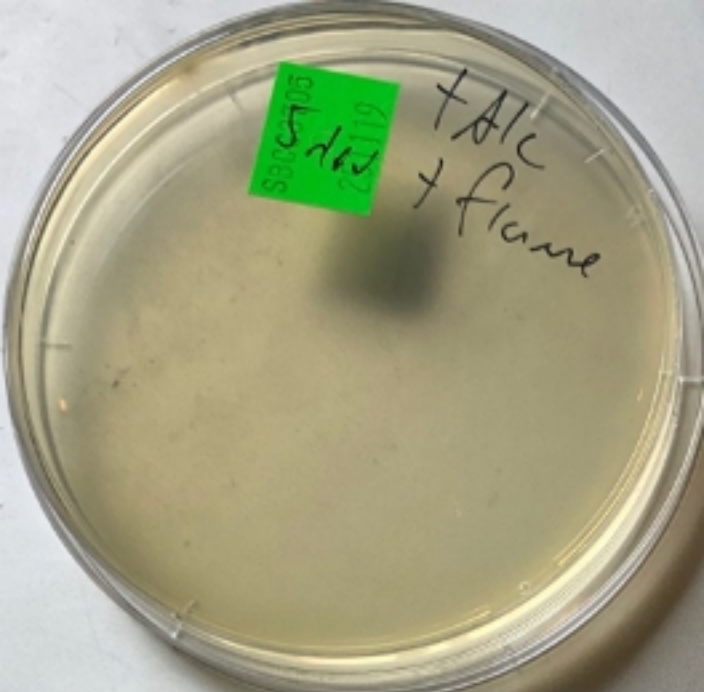

Figure 10c

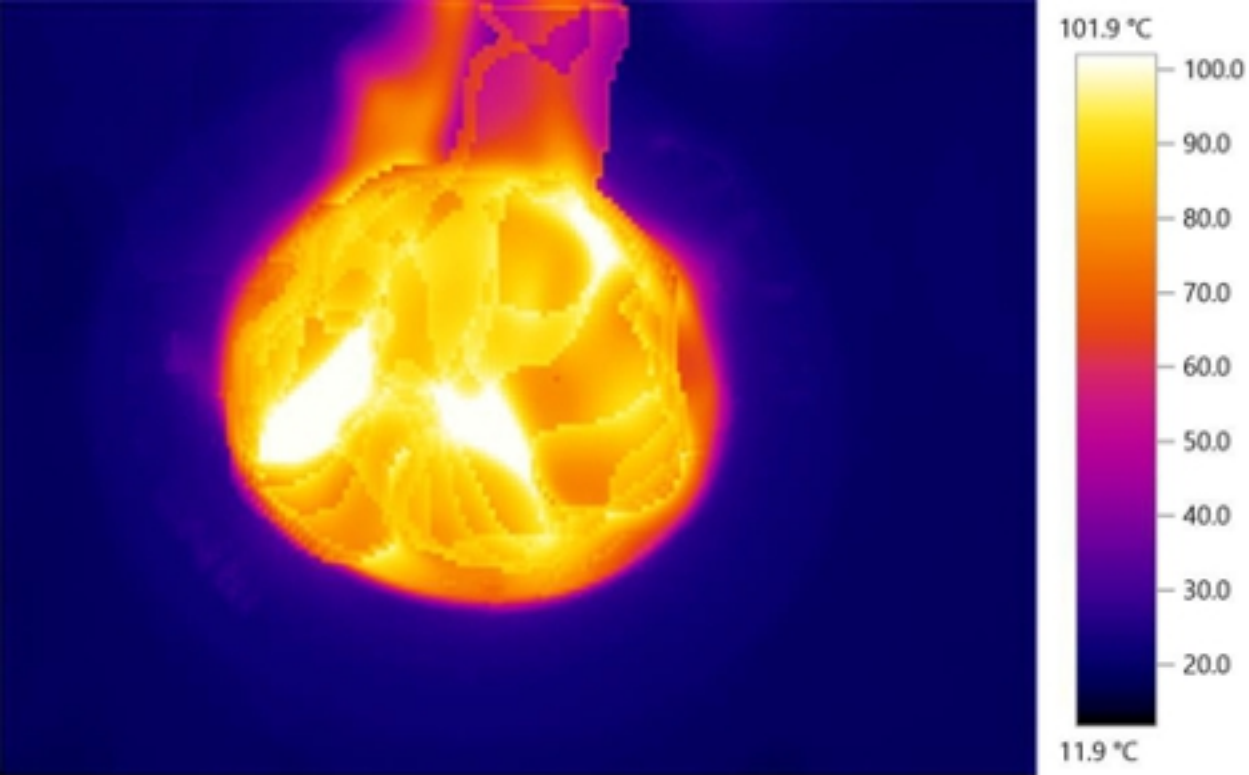

Figure 10d1

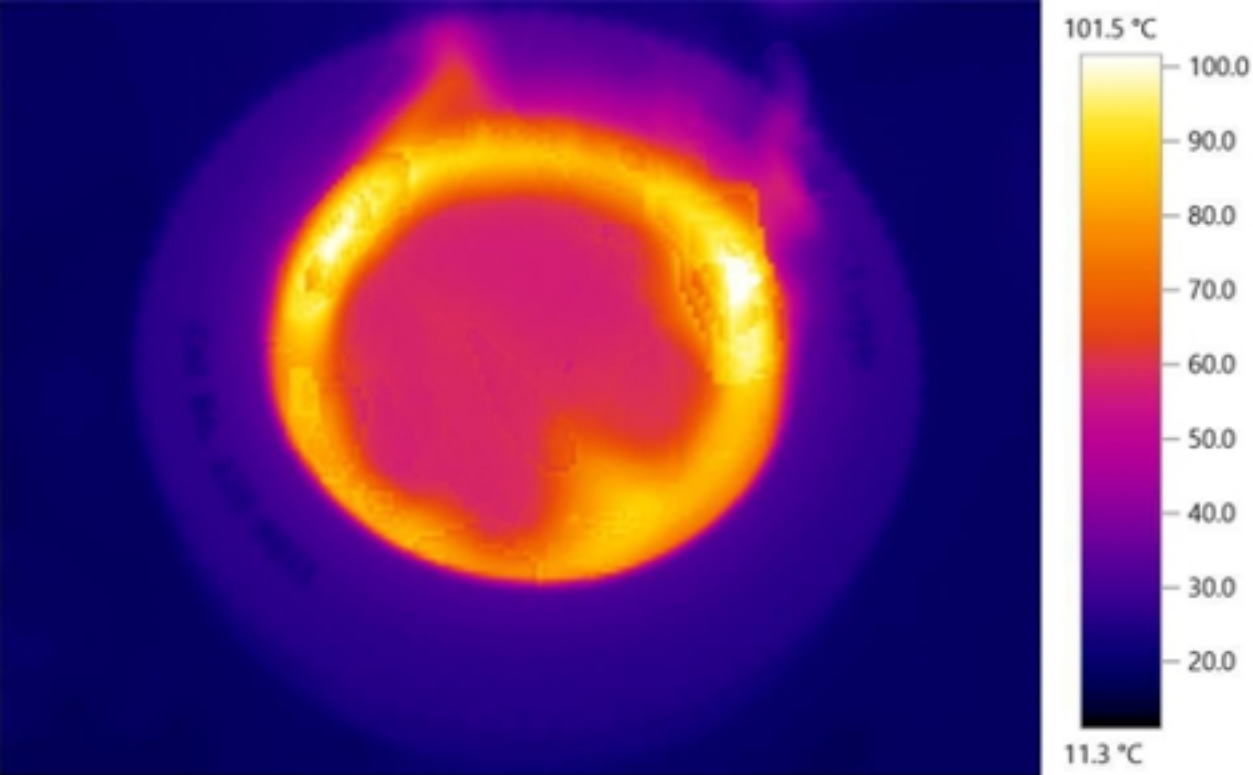

Figure 10d2

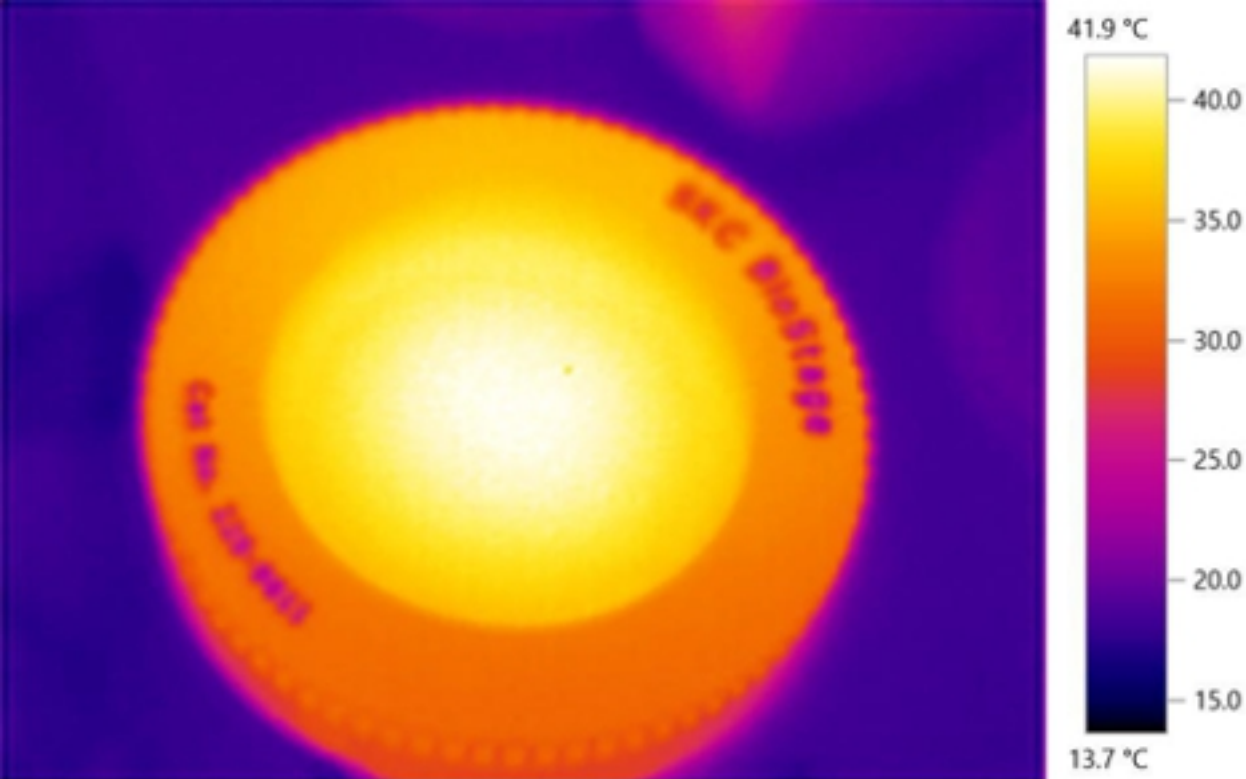

Figure 10d3
